# Supplementary material for: Relationship between gut microbiota and rheumatoid arthritis: A bibliometric analysis
Source: Front Immunol. 2023 Mar 1;14:1131933. doi: 10.3389/fimmu.2023.1131933 (PMC10015446; doi:10.3389/fimmu.2023.1131933)
Supplement: Supplementary file 1 [file DataSheet_1.xlsx]

## Sheet: Collected documents list
NO.	Authors	Article Title	Source Title	Document Type	Affiliations	Publication Year	DOI	Abstract
1	Porzio, S; Bossu, P; Ruggiero, P; Boraschi, D; Tagliabue, A	Mucosal delivery of anti-inflammatory IL-1Ra by sporulating recombinant bacteria	BMC BIOTECHNOLOGY	Article	Consiglio Nazionale delle Ricerche (CNR); Istituto di Tecnologie Biomediche (ITB-CNR); Zambon; IRCCS Santa Lucia; Novartis	2004	10.1186/1472-6750-4-27	Background: Mucosal delivery of therapeutic protein drugs or vaccines is actively investigated, in order to improve bioavailability and avoid side effects associated with systemic administration. Orally administered bacteria, engineered to produce anti-inflammatory cytokines (IL-10, IL-1Ra), have shown localised ameliorating effects in inflammatory gastro-intestinal conditions. However, the possi…
2	Fortun, PJ; Hawkey, CJ	Nonsteroidal antiinflammatory drugs and the small intestine	CURRENT OPINION IN GASTROENTEROLOGY	Article	University of Nottingham	2005	10.1097/01.mog.0000153314.51198.58	Purpose of review The small intestine is a more common site for nonsteroidal antiinflammatory drug (NSAID) toxicity than the well-recognized effects on the stomach and duodenum. Although NSAID strictures and perforation are rare, two thirds of regular-NSAID users may be prone to small bowel enteropathy. This review highlights this emerging issue in patients requiring aniinflammatory drugs. Recent…
3	Weisbart, RH; Min, Y; Wong, AL; Kang, J; Kwunyeun, S; Lin, A; Kim, J; Chan, G; Wakelin, R; Sohn, W; Chang, SS; Nishimura, RN	Selective IgA immune unresponsiveness to Proteus mirabilis fumarate reductase A-chain in rheumatoid arthritis	JOURNAL OF RHEUMATOLOGY	Article	University of California System; University of California Los Angeles; University of California Los Angeles Medical Center; University of California System; University of California Los Angeles; US Department of Veterans Affairs; Veterans Health Administration (VHA); VA Greater Los Angeles Healthcare System	2005		Objective. To determine if selective immune unresponsiveness to microbial antigens is associated with predisposition to rheumatoid arthritis (RA). Methods. Proteins from Proteus mirabilis lysate were isolated by SDS-PAGE and examined by Western blotting for antibody responses in sera from patients with RA compared to healthy subjects and patients with psoriatic arthritis (PsA). Results. Although …
4	Yoshino, S; Yamaki, K; Taneda, S; Yanagisawa, R; Takano, H	Reactivation of antigen-induced arthritis in mice by oral administration of lipopolysaccharide	SCANDINAVIAN JOURNAL OF IMMUNOLOGY	Article	Kobe Pharmaceutical University; Saga University; National Institute for Environmental Studies - Japan; National Institute for Environmental Studies - Japan	2005	10.1111/j.1365-3083.2005.01647.x	We examined whether oral administration of lipopolysaccharide (LPS) from Escherichia coli reactivated antigen-induced arthritis (AIA) in mice that is one of models of human rheumatoid arthritis. To induce AIA, mice were immunized by subcutaneous injection of ovalbumin (OVA) emulsified with complete Freund's adjuvant into the base of the tail (day 0) followed by intraarticular injection of OVA on …
5	Chiavaroli, C; Moore, A	An hypothesis to link the opposing immunological effects induced by the bacterial lysate OM-89 in urinary tract infection and rheumatoid arthritis	BIODRUGS	Article	Vifor Pharma; Celltech Group Ltd	2006	10.2165/00063030-200620030-00001	Extracts of lysed pathogenic bacteria were developed approximately 4 decades ago as oral vaccines in order to stimulate efficient specific immune and proinflammatory responses in patients experiencing recurrent infections, the ultimate aim being to rid the patient of the pathogen responsible for the infections. OM-89, a lysate of Escherichia coli, is clinically effective in patients who experienc…
6	Fortun, PJ; Hawkey, CJ	Nonsteroidal antiinflammatory drugs and the small intestine	CURRENT OPINION IN GASTROENTEROLOGY	Article	University of Nottingham	2007		Purpose of review The small intestine may be a more common site for nonsteroidal antiinflammatory drug toxicity than the gastroduodenal mucosa. Two-thirds of regular nonsteroidal antiinflammatory drug users develop subclinical small bowel enteropathy. This review highlights this emerging issue in patients requiring antiinflammatory drugs. Recent findings Nonsteroidal antiinflammatory drug enterop…
7	Thompson-Chagoyan, OC; Maldonado, J; Gil, A	Colonization and impact of disease and other factors on intestinal microbiota	DIGESTIVE DISEASES AND SCIENCES	Article	University of Granada; University of Granada; Instituto Mexicano del Seguro Social	2007	10.1007/s10620-006-9285-z	The aim of this study was to review the process of microbial colonization and the environmental and host factors that influence colonization and microbial succession. The impact of some diseases on intestinal microbiota composition is also described. Microbial colonization of the gut by maternal vaginal and fecal bacteria begins during and after birth. During the first 2 years of life, specific m…
8	Siala, M; Jaulhac, B; Gdoura, R; Sibilia, J; Fourati, H; Younes, M; Baklouti, S; Bargaoui, N; Sellami, S; Znazen, A; Barthel, C; Collin, E; Hammami, A; Sghir, A	Analysis of bacterial DNA in synovial tissue of Tunisian patients with reactive and undifferentiated arthritis by broad-range PCR, cloning and sequencing	ARTHRITIS RESEARCH & THERAPY	Article	Universite de Sfax; Hopital Habib Bourguiba; UDICE-French Research Universities; Universites de Strasbourg Etablissements Associes; Universite de Strasbourg; Universite de Sfax; Hopital Hedi Chaker; Universite de Monastir; Hopital Fattouma Bourguiba; Universite de Tunis-El-Manar; Hopital La Rabta; Centre National de la Recherche Scientifique (CNRS); CNRS - National Institute for Biology (INSB); U…	2008	10.1186/ar2398	Introduction Bacteria and/or their antigens have been implicated in the pathogenesis of reactive arthritis (ReA). Several studies have reported the presence of bacterial antigens and nucleic acids of bacteria other than those specified by diagnostic criteria for ReA in joint specimens from patients with ReA and various arthritides. The present study was conducted to detect any bacterial DNA and i…
9	Abdollahi-Roodsaz, S; Joosten, LAB; Koenders, MI; Devesa, I; Roelofs, MF; Radstake, TRDJ; Heuvelmans-Jacobs, M; Akira, S; Nicklin, MJH; Ribeiro-Dias, F; Van den Berg, WB	Stimulation of TLR2 and TLR4 differentially skews the balance of T cells in a mouse model of arthritis	JOURNAL OF CLINICAL INVESTIGATION	Article	Radboud University Nijmegen; Osaka University; Universidade Federal de Goias	2008	10.1172/JCI32639	TLRs may contribute to the progression of rheumatoid arthritis through recognition of microbial or host-derived ligands found in arthritic joints. Here, we show that TLR2 and TLR4, but not TLR9, are involved in the pathogenesis of autoimmune arthritis and play distinct roles in the regulation of T cells and cytokines. We investigated the involvement of TLR2, TLR4, and TLR9 in the progression of a…
10	Muller, A; Lamprecht, P	Interleukin-17 in chronic inflammatory and autoimmune diseases. Rheumatoid arthritis, Crohn's disease and Wegener's granulomatosis	ZEITSCHRIFT FUR RHEUMATOLOGIE	Article	University of Kiel; Schleswig Holstein University Hospital; University of Lubeck; University of Lubeck	2008	10.1007/s00393-007-0236-7	Data from recent animal experiments and clinical studies show that interleukin-17 (IL-17A, B, C, D, E, and F) plays an important role as proinflammatory cytokine in the host response to extracellular bacteria and in chronic inflammatory and autoimmune diseases. These findings have led to a revision of the well-known T(H)1/T(H)2 hypothesis. In rheumatoid arthritis elevated IL-17 serum levels, Th-1…
11	Vaahtovuo, J; Munukka, E; Korkeamaki, M; Luukkainen, R; Toivanen, P	Fecal microbiota in early rheumatoid arthritis	JOURNAL OF RHEUMATOLOGY	Article	Satakunta Central Hospital; University of Turku	2008		Objective. To compare the composition of intestinal microbiota of patients with early rheumatoid arthritis (RA) or fibromyalgia (FM), fecal samples were collected from 51 patients with RA and 50 with FM. Methods. RA patients fulfilled the RA criteria of the American College of Rheumatology, and duration of their disease was <= 6 months. Only nonhospitalized patients from outpatient care were incl…
12	Vesna, KJ; Katarina, M; Stanislava, S; Tatjana, M; Vesna, V; Mirjana, D	PRODUCTION OF H2O2 AND NO BY RAT PERITONEAL MACROPHAGES IN RESPONSE TO GUT COMMENSAL BACTERIA	ACTA VETERINARIA-BEOGRAD	Article	University of Belgrade	2009	10.2298/AVB0903111K	The importance of commensal bacteria in the immune system development and its involvement in the etiopatogenetic mechanisms of complex multifactorial and multigenic diseases is well documented. The aim of the present study was to compare the levels of hydrogen peroxide (H2O2) and nitric oxide (NO) produced by resident peritoneal macrophages from the autoimmune disease susceptible Dark Agouti (DA)…
13	Rovensky, J; Stancikova, M; Svik, K; Uteseny, J; Bauerova, K; Jurcovicova, J	Treatment of adjuvant-induced arthritis with the combination of methotrexate and probiotic bacteria Escherichia coli O83 (ColinfantA (R))	FOLIA MICROBIOLOGICA	Article	University Hospital Brno; Slovak Academy of Sciences; Slovak Academy of Sciences	2009	10.1007/s12223-009-0045-2	A certain relationship was observed between the gastrointestinal system, arthritis and immune system. Patients with rheumatoid arthritis have an altered microflora composition and disturbed intestinal defensive barrier. Effect of probiotic bacteria (ColinfantA (R); COL) with known favorable effect on intestinal microflora was determined on the methotrexate (MTX) treatment of adjuvant arthritis. R…
14	Abendroth, A; Michalsen, A; Ludtke, R; Ruffer, A; Musial, F; Dobos, GJ; Langhorst, J	Changes of Intestinal Microflora in Patients with Rheumatoid Arthritis during Fasting or a Mediterranean Diet	FORSCHENDE KOMPLEMENTARMEDIZIN	Article	Kliniken Essen-Mitte; University of Duisburg Essen	2010	10.1159/000322313	Background: Therapeutic dietary interventions are effective treatments for rheumatoid arthritis (RA). The mechanisms to affect inflammation and clinical outcome in rheumatoid arthritis are only partly understood. Alterations in intestinal microflora are believed to be associated with disease activity in RA. Aim: To evaluate changes in short-chain fatty acid (SCFA) profiles and clinical outcome in…
15	Lee, HJ; Waller, RD; Stebbings, S; Highton, J; Orlovich, DA; Schmierer, D; Fawcett, JP	The effects of an orally administered probiotic on sulfasalazine metabolism in individuals with rheumatoid arthritis: a preliminary study	INTERNATIONAL JOURNAL OF RHEUMATIC DISEASES	Article	University of Otago; University of Otago; University of Otago	2010	10.1111/j.1756-185X.2009.01449.x	Aim: To carry out a pilot study to investigate the effect of short-term oral probiotic administration on the metabolism of sulfasalazine (SSZ) in patients with rheumatoid arthritis (RA) stabilized on SSZ. Methods: Twelve subjects with RA taking stable doses of SSZ for a minimum of 3 months prior to the study, received a probiotic preparation contained three strains of bacteria (1.8 x 10(9) CFU/da…
16	Newkirk, MM; Zbar, A; Baron, M; Manges, AR	Distinct bacterial colonization patterns of Escherichia coli subtypes associate with rheumatoid factor status in early inflammatory arthritis	RHEUMATOLOGY	Article	McGill University; McGill University; McGill University; McGill University	2010	10.1093/rheumatology/keq088	Objectives. The aetiology of RA is unknown; however, bacterial exposure, particularly to Escherichia coli, Proteus mirabilis and Klebsiella pneumoniae, has been linked to disease pathogenesis. The strongest association was observed for RF(+) RA. We compare colonization patterns of these bacteria, and the anti-bacterial antibody levels in early onset RF(+) and RF(-) inflammatory arthritis. Methods…
17	Katayama, K; Matsuno, T; Waritani, T; Terato, K; Shionoya, H	Supplemental treatment of rheumatoid arthritis with natural milk antibodies against enteromicrobes and their toxins: results of an open-labelled pilot study	NUTRITION JOURNAL	Article	Asahikawa Medical College	2011	10.1186/1475-2891-10-2	Background: Environmental factors, particularly commensal bacteria in the gastrointestinal tract, may be involved in the pathogenesis of rheumatoid arthritis (RA). The aim of this study was to evaluate whether natural milk antibodies against a wide spectrum of pathogenic enteromicobes and their toxins modify the disease activity in RA. Methods: Twenty patients with RA, whose disease activity was …
18	Sonoyama, K; Miki, A; Sugita, R; Goto, H; Nakata, M; Yamaguchi, N	Gut colonization by Candida albicans aggravates inflammation in the gut and extra-gut tissues in mice	MEDICAL MYCOLOGY	Article	Hokkaido University; Hokkaido University	2011	10.3109/13693786.2010.511284	We examined whether Candida albicans gut colonization aggravates immune diseases in mice. Chronic and latent C. albicans gut colonization was established by the intragastric inoculation of C. albicans in mice fed as part of a purified diet. Allergic diarrhea was induced by repetitive intragastric administration of ovalbumin in sensitized BALB/c mice. Contact hypersensitivity was evaluated by meas…
19	Wenink, MH; Santegoets, KCM; Butcher, J; van Bon, L; Lamers-Karnebeek, FGM; van den Berg, WB; van Riel, PLCM; McInnes, IB; Radstake, TRDJ	Impaired Dendritic Cell Proinflammatory Cytokine Production in Psoriatic Arthritis	ARTHRITIS AND RHEUMATISM	Article	Radboud University Nijmegen; University of Glasgow	2011	10.1002/art.30577	Objective. The pathogenesis of psoriatic arthritis (PsA) remains poorly understood. The underlying chronic inflammatory immune response is thought to be triggered by unknown environmental factors potentially arising from a defective immune function. We undertook this study to determine whether an impaired acute inflammatory response by dendritic cells (DCs) might compromise the clearance of bacte…
20	Gomez, A; Luckey, D; Yeoman, CJ; Marietta, EV; Miller, MEB; Murray, JA; White, BA; Taneja, V	Loss of Sex and Age Driven Differences in the Gut Microbiome Characterize Arthritis-Susceptible*0401 Mice but Not Arthritis-Resistant*0402 Mice	PLOS ONE	Article	University of Illinois System; University of Illinois Urbana-Champaign; Mayo Clinic; Mayo Clinic; Mayo Clinic; University of Illinois System; University of Illinois Urbana-Champaign	2012	10.1371/journal.pone.0036095	Background: HLA-DRB1* 0401 is associated with susceptibility, while HLA-DRB1* 0402 is associated with resistance to developing rheumatoid arthritis (RA) and collagen-induced arthritis in humans and transgenic mice respectively. The influence of gut-joint axis has been suggested in RA, though not yet proven. Methodology/Principal Findings: We have used HLA transgenic mice carrying arthritis suscep…
21	Lee, HJ; Zhang, H; Orlovich, DA; Fawcett, JP	The influence of probiotic treatment on sulfasalazine metabolism in rat	XENOBIOTICA	Article	University of Otago; University of Otago	2012	10.3109/00498254.2012.660508	1. Probiotics are live microorganisms claimed to exert beneficial effects on the host. This study investigated their effect on the metabolism and pharmacokinetics of sulfasalazine (SSZ), a drug whose efficacy depends on metabolism by azoreductase (AR) in the gut microbiota to sulfapyridine (SP) and 5-acetylsalicylic acid (5-ASA). 2. The probiotic strains Lactobacillus acidophilus L10, Bifidobacte…
22	Syrbe, U; Scheer, R; Wu, PH; Sieper, J	Differential synovial Th1 cell reactivity towards Escherichia coli antigens in patients with ankylosing spondylitis and rheumatoid arthritis	ANNALS OF THE RHEUMATIC DISEASES	Article	Deutsches Rheuma-Forschungszentrum (DRFZ); Free University of Berlin; Humboldt University of Berlin; Charite Universitatsmedizin Berlin	2012	10.1136/annrheumdis-2012-201404	Objective Ankylosing spondylitis (AS) is associated with clinical and subclinical mucosal inflammation, suggesting that commensal bacteria contribute to the pathogenesis of the disease. Methods The frequency of Th1 cells reacting towards conserved Escherichia coli (E coli) proteins and pathogenicity factors in peripheral blood mononuclear cells (PBMNC) and synovial fluid mononuclear cells (SFMNC)…
23	Blander, JM; Torchinsky, MB; Campisi, L	Revisiting the old link between infection and autoimmune disease with commensals and T helper 17 cells	IMMUNOLOGIC RESEARCH	Article	Icahn School of Medicine at Mount Sinai	2012	10.1007/s12026-012-8311-9	Genetic composition and major histocompatibility complex polymorphisms unequivocally predispose to autoimmune disease, but environmental factors also play a critical role in precipitating disease in susceptible individuals. Notorious among these has been microbial infection. Older studies describing associations between microbial infection and autoimmune disease are now followed by new studies de…
24	Yeoh, N; Burton, JP; Suppiah, P; Reid, G; Stebbings, S	The Role of the Microbiome in Rheumatic Diseases	CURRENT RHEUMATOLOGY REPORTS	Article	University of Otago; Western University (University of Western Ontario); University of Otago; Western University (University of Western Ontario); Western University (University of Western Ontario)	2013	10.1007/s11926-012-0314-y	There is a growing understanding of the mechanisms by which the influence of the microbiota projects beyond sites of primary mucosal occupation to other human body systems. Bacteria present in the intestinal tract exert a profound effect on the host immune system, both locally and at distant sites. The oral cavity has its own characteristic microbiota, which concentrates in periodontal tissues an…
25	Liu, XF; Zou, QH; Zeng, BH; Fang, YF; Wei, H	Analysis of Fecal Lactobacillus Community Structure in Patients with Early Rheumatoid Arthritis	CURRENT MICROBIOLOGY	Article	Army Medical University; Army Medical University	2013	10.1007/s00284-013-0338-1	The objective of this study was to analyze human fecal Lactobacillus community and its relationship with rheumatoid arthritis. Samples taken from rheumatoid arthritis (RA) patients and healthy individuals were analyzed by quantitative real-time PCR. Bacterial DNA was extracted from feces, and amplicons of the Lactobacillus-specific regions of 16S rRNA were analyzed by denaturing gradient gel elec…
26	Scher, JU; Sczesnak, A; Longman, RS; Segata, N; Ubeda, C; Bielski, C; Rostron, T; Cerundolo, V; Pamer, EG; Abramson, SB; Huttenhower, C; Littman, DR	Expansion of intestinal Prevotella copri correlates with enhanced susceptibility to arthritis	ELIFE	Article	New York University; NYU Langone Medical Center; Hospital for Joint Disease NYULMC; New York University; University of California System; University of California San Francisco; Cornell University; University of Trento; Harvard University; Harvard T.H. Chan School of Public Health; Memorial Sloan Kettering Cancer Center; University of Valencia; University of Oxford; Howard Hughes Medical Institut…	2013	10.7554/eLife.01202	Rheumatoid arthritis (RA) is a prevalent systemic autoimmune disease, caused by a combination of genetic and environmental factors. Animal models suggest a role for intestinal bacteria in supporting the systemic immune response required for joint inflammation. Here we performed 16S sequencing on 114 stool samples from rheumatoid arthritis patients and controls, and shotgun sequencing on a subset …
27	Chappert, P	Role of SFB in autoimmune arthritis An example of regulation of autoreactive T cell sensitivity in the gut	GUT MICROBES	Article	National Institutes of Health (NIH) - USA; NIH National Institute of Allergy & Infectious Diseases (NIAID)	2014	10.4161/gmic.28134	A key role for segmented filamentous bacteria (SFB) has recently been demonstrated in several mouse models of autoimmune diseases, including autoimmune arthritis and multiple sclerosis. The mechanism governing the activation of systemic autoreactive T cell responses by such commensals in the gut, however, remained elusive. In this addendum, we discuss recent results addressing the local regulatio…
28	Vaghef-Mehrabany, E; Alipour, B; Homayouni-Rad, A; Sharif, SK; Asghari-Jafarabadi, M; Zavvari, S	Probiotic supplementation improves inflammatory status in patients with rheumatoid arthritis	NUTRITION	Article	Tabriz University of Medical Science; Tabriz University of Medical Science; Tabriz University of Medical Science; Tabriz University of Medical Science; Tabriz University of Medical Science; Tabriz University of Medical Science	2014	10.1016/j.nut.2013.09.007	Objectives: Rheumatoid arthritis (RA) is an inflammatory autoimmune disease in which the gut microbiota is altered. Probiotics are microorganisms that can normalize gut microbiota; thus, they may help to alleviate RA symptoms. The objective of the present clinical trial was to assess the effects of probiotic supplementation on disease activity and inflammatory cytokines in patients with RA. Metho…
29	Dorozynska, I; Majewska-Szczepanik, M; Marcinska, K; Szczepanik, M	Partial depletion of natural gut flora by antibiotic aggravates collagen induced arthritis (CIA) in mice	PHARMACOLOGICAL REPORTS	Article	Jagiellonian University; Collegium Medicum Jagiellonian University	2014	10.1016/j.pharep.2013.09.007	Background: Rheumatoid arthritis (RA) is a chronic inflammatory disease that affects about 1% of the adult population and occurs twice as frequently among women than men. At present it is accepted that pathogenesis of RA is based on inflammatory response mediated by CD4(+) Th1 and Th17 lymphocytes. The most commonly applied model imitating RA is the collagen induced arthritis (CIA). A growing evi…
30	Tieri, P; Zhou, XY; Zhu, LS; Nardini, C	Multi-omic landscape of rheumatoid arthritis: re-evaluation of drug adverse effects	FRONTIERS IN CELL AND DEVELOPMENTAL BIOLOGY	Article	Consiglio Nazionale delle Ricerche (CNR); Istituto per le Applicazioni del Calcolo Mauro Picone (IAC-CNR); Chinese Academy of Sciences; Shanghai Institutes for Biological Sciences, CAS; Max Planck Society	2014	10.3389/fcell.2014.00059	Objective: To provide a frame to estimate the systemic impact (side/adverse events) of (novel) therapeutic targets by taking into consideration drugs potential on the numerous districts involved in rheumatoid arthritis (RA) from the inflammatory and immune response to the gut-intestinal (GI) microbiome. Methods: We curated the collection of molecules from high-throughput screens of diverse (multi…
31	Estaki, M; DeCoffe, D; Gibson, DL	Interplay between intestinal alkaline phosphatase, diet, gut microbes and immunity	WORLD JOURNAL OF GASTROENTEROLOGY	Article	University of British Columbia; University of British Columbia Okanagan	2014	10.3748/wjg.v20.i42.15650	Intestinal alkaline phosphatase (IAP) plays an essential role in intestinal homeostasis and health through interactions with the resident microbiota, diet and the gut. IAP's role in the intestine is to dephosphorylate toxic microbial ligands such as lipopolysaccharides, unmethylated cytosine-guanosine dinucleotides and flagellin as well as extracellular nucleotides such as uridine diphosphate. IA…
32	Komatsu, N; Takayanagi, H	Arthritogenic T cells in autoimmune arthritis	INTERNATIONAL JOURNAL OF BIOCHEMISTRY & CELL BIOLOGY	Article	University of Tokyo; University of Tokyo; Japan Science & Technology Agency (JST)	2015	10.1016/j.biocel.2014.11.008	Autoimmune diseases, including arthritis, often result from an imbalance between regulatory T (Treg) cells and IL-17-producing (Th17) cells. Dozens of studies in mice and humans have shed light on the pathological significance of T cells in RA. Since Th17 cells play an important role in the exacerbation of inflammation and bone destruction in joints, it has been an important issue how arthritic T…
33	Faith, JJ; Colombel, JF; Gordon, JI	Identifying strains that contribute to complex diseases through the study of microbial inheritance	PROCEEDINGS OF THE NATIONAL ACADEMY OF SCIENCES OF THE UNITED STATES OF AMERICA	Article	Icahn School of Medicine at Mount Sinai; Icahn School of Medicine at Mount Sinai; Washington University (WUSTL)	2015	10.1073/pnas.1418781112	It has been 35 y since Carl Woese reported in PNAS how sequencing ribosomal RNA genes could be used to distinguish the three domains of life on Earth. During the past decade, 16S rDNA sequencing has enabled the now frequent enumeration of bacterial communities that populate the bodies of humans representing different ages, cultural traditions, and health states. A challenge going forward is to qu…
34	McLean, MH; Dieguez, D; Miller, LM; Young, HA	Does the microbiota play a role in the pathogenesis of autoimmune diseases?	GUT	Article	National Institutes of Health (NIH) - USA; NIH National Cancer Institute (NCI)	2015	10.1136/gutjnl-2014-308514	The microbiota of the human metaorganism is not a mere bystander. These microbes have coevolved with us and are pivotal to normal development and homoeostasis. Dysbiosis of the GI microbiota is associated with many disease susceptibilities, including obesity, malignancy, liver disease and GI pathology such as IBD. It is clear that there is direct and indirect crosstalk between this microbial comm…
35	Kovacevic-Jovanovic, V; Miletic, T; Stanojevic, S; Mitic, K; Dimitrijevic, M	IMMUNE RESPONSE TO GUT ESCHERICHIA COLI AND SUSCEPTIBILITY TO ADJUVANT ARTHRITIS IN THE RATS	ACTA MICROBIOLOGICA ET IMMUNOLOGICA HUNGARICA	Article		2015	10.1556/AMicr.62.2015.1.1	We have investigated the humoral immune response to antigens of predominant gut aerobic bacterial strains (i.e. Escherichia coli) over the course of adjuvant arthritis and oil-induced arthritis in two inbred rat strains: Dark Agouti (DA) and Albino Oxford (AO). We report the presence of antibodies specific to proteins of Escherichia coli in molecular weight range between 20-30 kDa in sera of dise…
36	Kim, JE; Chae, CS; Kim, GC; Hwang, W; Hwang, JS; Hwang, SM; Kim, Y; Ahn, YT; Park, SG; Jun, CD; Rudra, D; Im, SH	Lactobacillus helveticus suppresses experimental rheumatoid arthritis by reducing inflammatory T cell responses	JOURNAL OF FUNCTIONAL FOODS	Article	Gwangju Institute of Science & Technology (GIST); Institute for Basic Science - Korea (IBS); Chonnam National University; Pohang University of Science & Technology (POSTECH)	2015	10.1016/j.jff.2015.01.002	Although probiotics could confer health benefits to host physiology, their efficacy is strain specific. To identify anti-inflammatory probiotics, an ex vim screening system was developed, and validated effector functions of selected candidates using experimental rheumatoid arthritis as an in vivo model. Lactobacillus helveticus HY7801 was selected as the best candidate. Oral administration of L. …
37	Lepage, P	A place for the human microbiome in auto-immune diseases?	CORRESPONDANCES EN METABOLISMES HORMONES DIABETES ET NUTRITION	Article	AgroParisTech; INRAE; UDICE-French Research Universities; Universite Paris Saclay	2015		The Human intestinal microbiome encodes 100 times more genes than the Human genome. Inflammatory Bowel Diseases are associated with a microbial dysbiosis, affecting the main bacterial groups, with a decrease in bacteria from the Firmicutes phylum together with an increase in Proteobacteria phylum proportions. Commensal bacteria in the human gut may be involved in autoimmune diseases, such as rheu…
38	Sandberg, MEC; Bengtsson, C; Klareskog, L; Alfredsson, L; Saevarsdottir, S	Recent infections are associated with decreased risk of rheumatoid arthritis: a population-based case-control study	ANNALS OF THE RHEUMATIC DISEASES	Article	Karolinska Institutet; Lund University; Skane University Hospital; Karolinska Institutet; Karolinska University Hospital	2015	10.1136/annrheumdis-2014-206493	Objectives Do recent infections affect the risk of rheumatoid arthritis (RA)? Methods We used the population-based case-control study EIRA (N= 6401) on incident RA and healthy controls, matched for sex, age, calendar period and area of residence. Gastroenteritis, urinary tract infection, genital infection, prostatitis, sinusitis, tonsillitis and pneumonia during the 2 years before inclusion in th…
39	Ladda, B; Theparee, T; Chimchang, J; Tanasupawat, S; Taweechotipatr, M	In vitro modulation of tumor necrosis factor alpha production in THP-1 cells by lactic acid bacteria isolated from healthy human infants	ANAEROBE	Article	Srinakharinwirot University; Srinakharinwirot University; Chulalongkorn University	2015	10.1016/j.anaerobe.2015.03.002	The human microbiota is a source of probiotics capable of modulating the host immune system. In this study, we collected fecal samples from 100 healthy infants and isolated lactic acid bacteria which were screened for immune modulating effects on tumor necrosis factor alpha (TNF-alpha) production. Cell-free culture supernatants from 26 isolates were able to decrease TNF-alpha production in vitro …
40	Sattler, A; Dang-Heine, C; Reinke, P; Babel, N	IL-15 dependent induction of IL-18 secretion as a feedback mechanism controlling human MAIT-cell effector functions	EUROPEAN JOURNAL OF IMMUNOLOGY	Article	Free University of Berlin; Humboldt University of Berlin; Charite Universitatsmedizin Berlin; Ruhr University Bochum; St. Marien Hospital	2015	10.1002/eji.201445313	Mucosal-associated invariant T (MAIT) cells are characterized by an invariant TCRV alpha 7.2 chain recognizing microbial vitamin B metabolites presented by the MHC-Ib molecule MR1. They are mainly detectable in the CD8(+) and CD8(-)CD4(-) double negative T-cell compartments of mammals and exhibit both Th1- and Th17-associated features. As MAIT cells show a tissue-homing phenotype and operate at m…
41	Zhang, X; Zhang, DY; Jia, HJ; Feng, Q; Wang, DH; Liang, D; Wu, XN; Li, JH; Tang, LQ; Li, Y; Lan, Z; Chen, B; Li, YL; Zhong, HZ; Xie, HL; Jie, ZY; Chen, WN; Tang, SM; Xu, XQ; Wang, XK; Cai, XH; Liu, S; Xia, Y; Li, JY; Qiao, XY; Al-Aama, JY; Chen, H; Wang, L; Wu, QJ; Zhang, FC; Zheng, WJ; Li, YZ; Zhang, MR; Luo, GW; Xue, WB; Xiao, L; Li, J; Chen, WT; Xu, X; Yin, Y; Yang, HM; Wang, J; Kristiansen, K…	The oral and gut microbiomes are perturbed in rheumatoid arthritis and partly normalized after treatment	NATURE MEDICINE	Article	Chinese Academy of Medical Sciences - Peking Union Medical College; Peking Union Medical College Hospital; Chinese Academy of Medical Sciences - Peking Union Medical College; Peking Union Medical College; Beijing Genomics Institute (BGI); Beijing Genomics Institute (BGI); Beijing Genomics Institute (BGI); University of Copenhagen; South China University of Technology; Chinese Academy of Sciences;…	2015	10.1038/nm.3914	We carried out metagenomic shotgun sequencing and a metagenome-wide association study (MGWAS) of fecal, dental and salivary samples from a cohort of individuals with rheumatoid arthritis (RA) and healthy controls. Concordance was observed between the gut and oral microbiomes, suggesting overlap in the abundance and function of species at different body sites. Dysbiosis was detected in the gut and…
42	Mankia, K; Emery, P	Is Localized Autoimmunity the Trigger for Rheumatoid Arthritis? Unravelling New Targets for Prevention	DISCOVERY MEDICINE	Article	Chapel Allerton Hospital; University of Leeds; Leeds Biomedical Research Centre; University of Leeds	2015		The systemic autoantibodies that characterize rheumatoid arthritis (RA) are detectable well before patients develop disease and may originate from sites distant to the synovial joints. There is growing evidence that local autoimmune processes occur at mucosal sites in the earliest phases of RA, as well as in predisposed individuals who have not yet progressed to clinical disease. Mucosal autoimmu…
43	Sano, T; Huang, WD; Hall, JA; Yang, Y; Chen, A; Gavzy, SJ; Lee, JY; Ziel, JW; Miraldi, ER; Domingos, AI; Bonneau, R; Littman, DR	An IL-23R/IL-22 Circuit Regulates Epithelial Serum Amyloid A to Promote Local Effector Th17 Responses	CELL	Article	New York University; Howard Hughes Medical Institute; New York University; New York University; New York University; Instituto Gulbenkian de Ciencia	2015	10.1016/j.cell.2015.08.061	ROR gamma t(+) Th17 cells are important for mucosal defenses but also contribute to autoimmune disease. They accumulate in the intestine in response to microbiota and produce IL-17 cytokines. Segmented filamentous bacteria (SFB) are Th17-inducing commensals that potentiate autoimmunity in mice. ROR gamma t(+) T cells were induced in mesenteric lymph nodes early after SFB colonization and distribu…
44	Abhari, K; Shekarforoush, SS; Hosseinzadeh, S; Nazifi, S; Sajedianfard, J; Eskandari, MH	The effects of orally administered Bacillus coagulans and inulin on prevention and progression of rheumatoid arthritis in rats	FOOD & NUTRITION RESEARCH	Article	Shiraz University; Shiraz University; Shiraz University; Shiraz University	2016	10.3402/fnr.v60.30876	Background: Probiotics have been considered as an approach to addressing the consequences of different inflammatory disorders. The spore-forming probiotic strain Bacillus coagulans has demonstrated anti-inflammatory and immune-modulating effects in both animals and humans. The prebiotic inulin also potentially affects the immune system as a result of the change in the composition or fermentation …
45	Block, KE; Zheng, Z; Dent, AL; Kee, BL; Huang, HC	Gut Microbiota Regulates K/BxN Autoimmune Arthritis through Follicular Helper T but Not Th17 Cells	JOURNAL OF IMMUNOLOGY	Article	University of Chicago; University of Chicago; University of Chicago; Indiana University System; Indiana University Bloomington; University of Chicago	2016	10.4049/jimmunol.1501904	The bacterial community that colonizes mucosal surfaces helps shape the development and function of the immune system. The K/BxN autoimmune arthritis model is dependent on the microbiota, and particularly on segmented filamentous bacteria, for the autoimmune phenotype. The mechanisms of how the gut microbiota affects arthritis development are not well understood. In this study, we investigate the…
46	Shao, TJ; He, ZX; Xie, ZJ; Li, HC; Wang, MJ; Wen, CP	Characterization of ankylosing spondylitis and rheumatoid arthritis using H-1 NMR-based metabolomics of human fecal extracts	METABOLOMICS	Article	Zhejiang Chinese Medical University	2016	10.1007/s11306-016-1000-2	Introduction The differences in fecal metabolome between ankylosing spondylitis (AS)/rheumatoid arthritis (RA) patients and healthy individuals could be the reason for an autoimmune disorder. Objectives The study explored the fecal metabolome difference between AS/RA patients and healthy controls to clarify human immune disturbance. Methods Fecal samples from 109 individuals (healthy controls 34,…
47	Chen, J; Wright, K; Davis, JM; Jeraldo, P; Marietta, EV; Murray, J; Nelson, H; Matteson, EL; Taneja, V	An expansion of rare lineage intestinal microbes characterizes rheumatoid arthritis	GENOME MEDICINE	Article	Mayo Clinic; Mayo Clinic; Mayo Clinic; Mayo Clinic; Mayo Clinic; Mayo Clinic	2016	10.1186/s13073-016-0299-7	Background: The adaptive immune response in rheumatoid arthritis (RA) is influenced by an interaction between host genetics and environment, particularly the host microbiome. Association of the gut microbiota with various diseases has been reported, though the specific components of the microbiota that affect the host response leading to disease remain unknown. However, there is limited informati…
48	Montoya, J; Matta, NB; Suchon, P; Guzian, MC; Lambert, NC; Mattei, JP; Guis, S; Breban, M; Roudier, J; Balandraud, N	Patients with ankylosing spondylitis have been breast fed less often than healthy controls: a case-control retrospective study	ANNALS OF THE RHEUMATIC DISEASES	Article	UDICE-French Research Universities; Aix-Marseille Universite; Assistance Publique-Hopitaux de Marseille; Institut National de la Sante et de la Recherche Medicale (Inserm); UDICE-French Research Universities; Aix-Marseille Universite; Institut National de la Sante et de la Recherche Medicale (Inserm); UDICE-French Research Universities; Aix-Marseille Universite; UDICE-French Research Universities…	2016	10.1136/annrheumdis-2015-208187	Objective Ankylosing spondylitis (AS) is a chronic inflammatory disease affecting the spine and pelvis of young adults. On the HLA-B27 genetic background, the occurrence of AS is influenced by the intestinal microbiota. The goal of our study was to test whether breast feeding, which influences microbiota, can prevent the development of AS. Methods First, 203 patients with HLA-B27-positive AS fulf…
49	Garn, H; Bahn, S; Baune, BT; Binder, EB; Bisgaard, H; Chatila, TA; Chavakis, T; Culmsee, C; Dannlowski, U; Gay, S; Gern, J; Haahtela, T; Kircher, T; Muller-Ladner, U; Neurath, MF; Preissner, KT; Reinhardt, C; Rook, G; Russell, S; Schmeck, B; Stappenbeck, T; Steinhoff, U; van Os, J; Weiss, S; Zemlin, M; Renz, H	Current concepts in chronic inflammatory diseases: Interactions between microbes, cellular metabolism, and inflammation	JOURNAL OF ALLERGY AND CLINICAL IMMUNOLOGY	Article	Philipps University Marburg; Philipps University Marburg; Philipps University Marburg; Philipps University Marburg; University of Cambridge; University of Adelaide; Max Planck Society; University of Copenhagen; Harvard University; Boston Children's Hospital; Technische Universitat Dresden; University of Munster; University of Zurich; University Zurich Hospital; University of Helsinki; Helsinki Un…	2016	10.1016/j.jaci.2016.02.046	Recent research indicates that chronic inflammatory diseases, including allergies and autoimmune and neuropsychiatric diseases, share common pathways of cellular and molecular dysregulation. It was the aim of the International von-Behring-Rontgen Symposium (October 16-18, 2014, in Marburg, Germany) to discuss recent developments in this field. These include a concept of biodiversity; the contribu…
50	Liu, XF; Zeng, BH; Zhang, J; Li, WX; Mou, FX; Wang, H; Zou, QH; Zhong, B; Wu, LK; Wei, H; Fang, YF	Role of the Gut Microbiome in Modulating Arthritis Progression in Mice	SCIENTIFIC REPORTS	Article	Army Medical University; Army Medical University; Army Medical University	2016	10.1038/srep30594	Genetics alone cannot explain most cases of rheumatoid arthritis (RA). Thus, investigating environmental factors such as the gut microbiota may provide new insights into the initiation and progression of RA. In this study, we performed 16S rRNA sequencing to characterise the gut microbiota of DBA1 mice that did or did not develop arthritis after induction with collagen. We found that divergence i…
51	Ciccia, F; Ferrante, A; Guggino, G; Triolo, G	The role of the gastrointestinal tract in the pathogenesis of rheumatic diseases	BEST PRACTICE & RESEARCH IN CLINICAL RHEUMATOLOGY	Article	University of Palermo	2016	10.1016/j.berh.2016.10.003	Dysregulation of the intestinal epithelial barrier in genetically susceptible individuals may lead to both intestinal and extra intestinal autoimmune disorders. There is emerging literature on the role of microbiota changes in the pathogenesis of systemic rheumatic diseases such as rheumatoid arthritis, spondyloarthr-opathies, and connective tissue diseases. Although the role of the gastrointesti…
52	Rosenbaum, JT; Asquith, MJ	The Microbiome: a Revolution in Treatment for Rheumatic Diseases?	CURRENT RHEUMATOLOGY REPORTS	Article	Oregon Health & Science University; Oregon Health & Science University; Devers Eye Institute	2016	10.1007/s11926-016-0614-8	Purpose of Review The microbiome is the term that describes the microbial ecosystem that cohabits an organism such as humans. The microbiome has been implicated in a long list of immune-mediated diseases which include rheumatoid arthritis, ankylosing spondylitis, and even gout. The mechanisms to account for this effect are multiple. The clinical implications from observations on the microbiome an…
53	Root-Bernstein, R	Autoimmunity and the microbiome: T-cell receptor mimicry of self and microbial antigens mediates self tolerance in holobionts: The concepts of holoimmunity (TcR-mediated tolerance for the holobiont) and holoautoimmunity (loss of tolerance for the holobiont) are introduced	BIOESSAYS	Article	Michigan State University	2016	10.1002/bies.201600083	I propose a T-cell receptor (TcR)-based mechanism by which immunity mediates both genetic self and microbial self thereby, connecting microbiome disease with autoimmunity. The hypothesis is based on simple principles. First, TcR are selected to avoid strong cross-reactivity with self, resulting in selection for a TcR repertoire mimicking genetic self. Second, evolution has selected for a microbia…
54	Maeda, Y; Kurakawa, T; Umemoto, E; Motooka, D; Ito, Y; Gotoh, K; Hirota, K; Matsushita, M; Furuta, Y; Narazaki, M; Sakaguchi, N; Kayama, H; Nakamura, S; Iida, T; Saeki, Y; Kumanogoh, A; Sakaguchi, S; Takeda, K	Dysbiosis Contributes to Arthritis Development via Activation of Autoreactive T Cells in the Intestine	ARTHRITIS & RHEUMATOLOGY	Article	Osaka University; Kyoto University; Okayama University	2016	10.1002/art.39783	ObjectiveThe intestinal microbiota is involved in the pathogenesis of arthritis. Altered microbiota composition has been demonstrated in patients with rheumatoid arthritis (RA). However, it remains unclear how dysbiosis contributes to the development of arthritis. The aim of this study was to investigate whether altered composition of human intestinal microbiota in RA patients contributes to the …
55	Schirmer, M; Smeekens, SP; Vlamakis, H; Jaeger, M; Oosting, M; Franzosa, EA; ter Horst, R; Jansen, T; Jacobs, L; Bonder, MJ; Kurilshikov, A; Fu, JY; Joosten, LAB; Zhernakova, A; Huttenhower, C; Wijmenga, C; Netea, MG; Xavier, RJ	Linking the Human Gut Microbiome to Inflammatory Cytokine Production Capacity	CELL	Article	Harvard University; Massachusetts Institute of Technology (MIT); Broad Institute; Harvard University; Harvard T.H. Chan School of Public Health; Radboud University Nijmegen; Radboud University Nijmegen; University of Groningen; Institute of Chemical Biology & Fundamental Medicine, Siberian Branch of the RAS; Russian Academy of Sciences; Novosibirsk State University; University of Groningen; Harva…	2016	10.1016/j.cell.2016.10.020	Gut microbial dysbioses are linked to aberrant immune responses, which are often accompanied by abnormal production of inflammatory cytokines. As part of the Human Functional Genomics Project (HFGP), we investigate how differences in composition and function of gut microbial communities may contribute to inter-individual variation in cytokine responses to microbial stimulations in healthy humans.…
56	Zhou, XY; Nardini, C	A method for automated pathogenic content estimation with application to rheumatoid arthritis	BMC SYSTEMS BIOLOGY	Article	Chinese Academy of Sciences; Shanghai Institutes for Biological Sciences, CAS; Max Planck Society; Chinese Academy of Sciences; University of Chinese Academy of Sciences, CAS	2016	10.1186/s12918-016-0344-6	Background: Sequencing technologies applied to mammals' microbiomes have revolutionized our understanding of health and disease. Hence, to assess diseases' progression as well as therapies longterm effects, the impact of maladies and drugs on the gut-intestinal (GI) microbiome has to be evaluated. Typical metagenomic analyses are run to associate to a condition (disease, therapy, diet) a pool of …
57	Marietta, EV; Murray, JA; Luckey, DH; Jeraldo, PR; Lamba, A; Patel, R; Luthra, HS; Mangalam, A; Taneja, V	Suppression of Inflammatory Arthritis by Human Gut-Derived Prevotella histicola in Humanized Mice	Arthritis & Rheumatology	Article	University of Iowa; Mayo Clinic	2016	10.1002/art.39785	Objective. The gut microbiome regulates host immune homeostasis. Rheumatoid arthritis (RA) is associated with intestinal dysbiosis. This study was undertaken to test the ability of a human gut-derived commensal to modulate immune response and treat arthritis in a humanized mouse model. Methods. We isolated a commensal bacterium, Prevotella histicola, that is native to the human gut and has system…
58	Liu, XF; Zhang, J; Zou, QH; Zhong, B; Wang, H; Mou, FX; Wu, LK; Fang, YF	Lactobacillus salivarius Isolated from Patients with Rheumatoid Arthritis Suppresses Collagen-Induced Arthritis and Increases Treg Frequency in Mice	JOURNAL OF INTERFERON AND CYTOKINE RESEARCH	Article	Army Medical University; Army Medical University	2016	10.1089/jir.2016.0057	Previously, we demonstrated that Lactobacillus salivarius was more abundant in patients with rheumatoid arthritis (RA), an inflammatory autoimmune disease wherein the gut microbiota is altered, than in healthy individuals. However, the effect of L. salivarius in RA is unclear. Hence, we investigated the effect of L. salivarius isolated from patients with RA on collagen-induced arthritis (CIA) in …
59	Tan, TG; Sefik, E; Geva-Zatorsky, N; Kua, L; Naskar, D; Teng, F; Pasman, L; Ortiz-Lopez, A; Jupp, R; Wu, HJJ; Kasper, DL; Benoist, C; Mathis, D	Identifying species of symbiont bacteria from the human gut that, alone, can induce intestinal Th17 cells in mice	PROCEEDINGS OF THE NATIONAL ACADEMY OF SCIENCES OF THE UNITED STATES OF AMERICA	Article	Harvard University; Harvard Medical School; University of Arizona; UCB Pharma SA; University of Arizona	2016	10.1073/pnas.1617460113	Th17 cells accrue in the intestine in response to particular microbes. In rodents, segmented filamentous bacteria (SFB) induce intestinal Th17 cells, but analogously functioning microbes in humans remain undefined. Here, we identified human symbiont bacterial species, in particular Bifidobacterium adolescentis, that could, alone, induce Th17 cells in the murine intestine. Similar to SFB, B. adole…
60	Makela, R; Makila, H; Peltomaa, R	Dietary Therapy in Patients With Inflammatory Arthritis	ALTERNATIVE THERAPIES IN HEALTH AND MEDICINE	Article	University of Helsinki; University of Helsinki; Helsinki University Central Hospital	2017		Context The exact etiology of rheumatoid disease is currently unknown. Changes in the microbiota of the gastrointestinal (GI) tract, chronic bacterial infection of the upper urinary tract, increased permeability of the GI tract, and food sensitivities have been classified among the factors that may cause or aggravate the disease. Dietary deficiencies also may render patients more susceptible to i…
61	Mizuno, M; Noto, D; Kaga, N; Chiba, A; Miyake, S	The dual role of short fatty acid chains in the pathogenesis of autoimmune disease models	PLOS ONE	Article	Juntendo University; Juntendo University	2017	10.1371/journal.pone.0173032	Autoimmune diseases are influenced by both genetic and environmental factors. The gut environment has attracted much attention as an essential component that modulates immune responses, and therefore immune-mediated disorders, such as autoimmune diseases. Growing evidence suggests that microbiota and their metabolites are critical factors for immune modulation. Recently, we reported that the micr…
62	Schroder, T; Ibrahim, S	The microbiome and autoimmunity	INTERNIST	Article	University of Kiel; Schleswig Holstein University Hospital; University of Kiel; Schleswig Holstein University Hospital; University of Lubeck; University of Lubeck	2017	10.1007/s00108-017-0221-4	An abundant and diverse set of commensal microbial communities covers the body's surfaces, collectively so-called microbiome. It has a functional impact on various immune processes and modulates many health-related processes, including autoimmunity. An active site of microorganism-host interplay is the intestinal mucosa. Growing evidence has helped us to learn how a specific microbiota compositio…
63	Ananthakrishnan, AN; Luo, CW; Yajnik, V; Khalili, H; Garber, JJ; Stevens, BW; Cleland, T; Xavier, RJ	Gut Microbiome Function Predicts Response to Anti-integrin Biologic Therapy in Inflammatory Bowel Diseases	CELL HOST & MICROBE	Article	Harvard University; Massachusetts General Hospital; Harvard University; Harvard Medical School; Harvard University; Massachusetts Institute of Technology (MIT); Broad Institute; Massachusetts Institute of Technology (MIT)	2017	10.1016/j.chom.2017.04.010	The gut microbiome plays a central role in inflammatory bowel diseases (IBDs) pathogenesis and propagation. To determine whether the gut microbiome may predict responses to IBD therapy, we conducted a prospective study with Crohn's disease (CD) or ulcerative colitis (UC) patients initiating anti-integrin therapy (vedolizumab). Disease activity and stool metagenomes at baseline, and weeks 14, 30, …
64	Kang, Y; Cai, Y; Zhang, X; Kong, X; Su, J	Altered gut microbiota in RA: implications for treatment	ZEITSCHRIFT FUR RHEUMATOLOGIE	Article	Kunming University of Science & Technology	2017	10.1007/s00393-016-0237-5	Rheumatoid arthritis (RA) is an autoimmune disease with progressive joint disorder. The complex interplay of genetic and environmental influences is important for the development of the disease. A growing body of evidence has shed light on the association of dysbiosis of gut microbiota with RA. Certain gut microbial strains have been shown to inhibit or attenuate immune responses in RA experiment…
65	Rogier, R; Ederveen, THA; Boekhorst, J; Wopereis, H; Scher, JU; Manasson, J; Frambach, SJCM; Knol, J; Garssen, J; van der Kraan, PM; Koenders, MI; van den Berg, WB; van Hijum, SAFT; Abdollahi-Roodsaz, S	Aberrant intestinal microbiota due to IL-1 receptor antagonist deficiency promotes IL-17-and TLR4-dependent arthritis	MICROBIOME	Article	Radboud University Nijmegen; Radboud University Nijmegen; NIZO Food Research; Danone Nutricia; Wageningen University & Research; New York University; Utrecht University	2017	10.1186/s40168-017-0278-2	Background: Perturbation of commensal intestinal microbiota has been associated with several autoimmune diseases. Mice deficient in interleukin-1 receptor antagonist (Il1rn(-/-) mice) spontaneously develop autoimmune arthritis and are susceptible to other autoimmune diseases such as psoriasis, diabetes, and encephalomyelitis; however, the mechanisms of increased susceptibility to these autoimmune…
66	Wang, QQ; Xu, R	MetabolitePredict: A de novo human metabolomics prediction system and its applications in rheumatoid arthritis	JOURNAL OF BIOMEDICAL INFORMATICS	Article	Case Western Reserve University	2017	10.1016/j.jbi.2017.06.002	Human metabolomics has great potential in disease mechanism understanding, early diagnosis, and therapy. Existing metabolomics studies are often based on profiling patient biofluids and tissue samples and are difficult owing to the challenges of sample collection and data processing. Here, we report an alternative approach and developed a computation-based prediction system, MetabolitePredict, fo…
67	Negi, S; Singh, H; Mukhopadhyay, A	Gut bacterial peptides with autoimmunity potential as environmental trigger for late onset complex diseases: In-silico study	PLOS ONE	Article	Indian Council of Medical Research (ICMR); ICMR - National Institute of Pathology (IOP); University of Delhi	2017	10.1371/journal.pone.0180518	Recent evidences suggest that human gut microbiota with major component as bacteria can induce immunity. It is also known that gut lining depletes with ageing and that there is increased risk of autoimmune and inflammatory disorders with ageing. It is therefore likely that both may be correlated as depletion of gut lining exposes the gut bacterial antigens to host immune mechanisms, which may ind…
68	Ben-Amram, H; Bashi, T; Werbner, N; Neuman, H; Fridkin, M; Blank, M; Shoenfeld, Y; Koren, O	Tuftsin-Phosphorylcholine Maintains Normal Gut Microbiota in Collagen Induced Arthritic Mice	FRONTIERS IN MICROBIOLOGY	Article	Bar Ilan University; Chaim Sheba Medical Center; Tel Aviv University; Sackler Faculty of Medicine; Weizmann Institute of Science	2017	10.3389/fmicb.2017.01222	Rheumatoid arthritis (RA) is characterized by chronic autoinflammation of the joints, with a prevalence of about 1% in Western populations. Evidence in recent years has linked RA to changes in the gut microbiota (dysbiosis). Interestingly, helminths have been shown to have therapeutic activity in RA. Specifically, a glycoprotein containing phosphorylcholine (PC) extracted from helminths was found…
69	Sato, K; Takahashi, N; Kato, T; Matsuda, Y; Yokoji, M; Yamada, M; Nakajima, T; Kondo, N; Endo, N; Yamamoto, R; Noiri, Y; Ohno, H; Yamazaki, K	Aggravation of collagen-induced arthritis by orally administered Porphyromonas gingivalis through modulation of the gut microbiota and gut immune system	SCIENTIFIC REPORTS	Article	Niigata University; Niigata University; Niigata University; RIKEN; Niigata University; Niigata University; Kyoto University; Niigata University; RIKEN	2017	10.1038/s41598-017-07196-7	Porhyromonas gingivalis, a causative bacterium of periodontitis, is implicated in the etiology of rheumatoid arthritis (RA), mainly because of expressing peptidyl arginine deiminase (PAD) that generates RA-related autoantigens. However, compared with other periodontopathic bacteria, the precise role of P. gingivalis in RA is largely unknown. We found that orally administered P. gingivalis changed…
70	Pianta, A; Arvikar, SL; Strle, K; Drouin, EE; Wang, Q; Costello, CE; Steere, AC	Two rheumatoid arthritis-specific autoantigens correlate microbial immunity with autoimmune responses in joints	JOURNAL OF CLINICAL INVESTIGATION	Article	Harvard University; Harvard Medical School; Massachusetts General Hospital; Boston University; Agenus Inc; Waters Corporation	2017	10.1172/JCI93450	In rheumatoid arthritis (RA), immunological triggers at mucosal sites, such as the gut microbiota, may promote autoimmunity that affects joints. Here, we used discovery-based proteomics to detect HLA-DR-presented peptides in synovia or peripheral blood mononuclear cells and identified 2 autoantigens, N-acetylglucosamine-6-sulfatase (GNS) and filamin A (FLNA), as targets of T and B cell responses …
71	Teng, F; Felix, KM; Bradley, CP; Naskar, D; Ma, HQ; Raslan, WA; Wu, HJJ	The impact of age and gut microbiota on Th17 and Tfh cells in K/BxN autoimmune arthritis	ARTHRITIS RESEARCH & THERAPY	Article	University of Arizona; University of Arizona	2017	10.1186/s13075-017-1398-6	Background: Age is an important risk factor for rheumatoid arthritis (RA), which often develops in middle age. However, how age-associated changes in immunity impact RA is poorly understood. Gut microbiota are known to be involved in the pathogenesis of RA, but the effects of microbiota in older subjects remain mostly unknown. Methods: We used segmented filamentous bacteria (SFB), a gut commensal…
72	Jain, S; Ward, JM; Shin, DM; Wang, HS; Naghashfar, Z; Kovalchuk, AL; Morse, HC	Associations of Autoimmunity, Immunodeficiency, Lymphomagenesis, and Gut Microbiota in Mice with Knockins for a Pathogenic Autoantibody	AMERICAN JOURNAL OF PATHOLOGY	Article	National Institutes of Health (NIH) - USA; NIH National Institute of Allergy & Infectious Diseases (NIAID); Seoul National University (SNU); Yeshiva University; Albert Einstein College of Medicine	2017	10.1016/j.ajpath.2017.05.017	A number of mouse strains transgenic for B-cell receptors specific for nucleic acids or other auto antigens have been generated to understand how autoreactive B cells are regulated in normal and autoimmune mice. Previous studies of nonautoimmune C57BL/6 mice heterozygous for both the IgH and IgL knockins of the polyreactive autoantibody, 564, produced high Levels of autoantibodies in a largely To…
73	Breban, M; Tap, J; Leboime, A; Said-Nahal, R; Langella, P; Chiocchia, G; Furet, JP; Sokol, H	Faecal microbiota study reveals specific dysbiosis in spondyloarthritis	ANNALS OF THE RHEUMATIC DISEASES	Article	UDICE-French Research Universities; Universite Paris Saclay; UDICE-French Research Universities; Universite Paris Cite; Assistance Publique Hopitaux Paris (APHP); Hopital Universitaire Ambroise-Pare - APHP; UDICE-French Research Universities; Aix-Marseille Universite; Assistance Publique-Hopitaux de Marseille; AgroParisTech; INRAE; UDICE-French Research Universities; Universite Paris Saclay; INRA…	2017	10.1136/annrheumdis-2016-211064	Objective Altered microbiota composition or dysbiosis is suspected to be implicated in the pathogenesis of chronic inflammatory diseases, such as spondyloarthritis (SpA) and rheumatoid arthritis (RA). Methods 165 ribosomal RNA gene sequencing was performed on faecal DNA isolated from stool samples in two consecutive cross-sectional cohorts, each comprising three groups of adult volunteers: SpA, R…
74	Lu, YT; Zhou, XY; Nardini, C	Dissection of the module network implementation LemonTree: enhancements towards applications in metagenomics and translation in autoimmune maladies	MOLECULAR BIOSYSTEMS	Article	Chinese Academy of Sciences; Shanghai Institutes for Biological Sciences, CAS; Max Planck Society; Chinese Academy of Sciences; University of Chinese Academy of Sciences, CAS; University of Pennsylvania; Consiglio Nazionale delle Ricerche (CNR); Istituto per le Applicazioni del Calcolo Mauro Picone (IAC-CNR)	2017	10.1039/c7mb00248c	Under the current deluge of omics, module networks distinctively emerge as methods capable of not only identifying inherently coherent groups (modules), thus reducing dimensionality, but also hypothesizing cause-effect relationships between modules and their regulators. Module networks were first designed in the transcriptomic era and further exploited in the multi-omic context to assess (for exa…
75	Pentony, P; Duquenne, L; Dutton, K; Mankia, K; Gul, H; Vital, E; Emery, P	The Initiation of Autoimmunity at Epithelial Surfaces: a Focus on Rheumatoid Arthritis and Systemic Lupus Erythematosus	DISCOVERY MEDICINE	Article	University of Leeds	2017		It is well established that the autoantibodies that characterize both rheumatoid arthritis (RA) and systemic lupus erythematosus (SLE) are present systemically years before patients develop disease. In both these autoimmune rheumatic diseases, evidence is growing that local autoimmune processes occur at epithelial surfaces potentially initiating localized autoimmunity. For RA, these are mucosal s…
76	Schorpion, A; Kolasinski, SL	Can Probiotic Supplements Improve Outcomes in Rheumatoid Arthritis?	CURRENT RHEUMATOLOGY REPORTS	Article	University of Pennsylvania; Pennsylvania Medicine	2017	10.1007/s11926-017-0696-y	Purpose of Review The purpose of this review is to frame the discussion of the potential use of probiotics for the management of rheumatoid arthritis (RA) in the historical and scientific context linking the human microbiota to the etiology, pathogenesis, and treatment of RA. Given this context, the review then details the clinical trials that have been carried out so far that have tried to addre…
77	Rogier, R; Evans-Marin, H; Manasson, J; van der Kraan, PM; Walgreen, B; Helsen, MM; van den Bersselaar, LA; van de Loo, FA; Van Lent, PL; Abramson, SB; van den Berg, WB; Koenders, MI; Scher, JU; Abdollahi-Roodsaz, S	Alteration of the intestinal microbiome characterizes preclinical inflammatory arthritis in mice and its modulation attenuates established arthritis	SCIENTIFIC REPORTS	Article	Radboud University Nijmegen; New York University	2017	10.1038/s41598-017-15802-x	Perturbations of the intestinal microbiome have been observed in patients with new-onset and chronic autoimmune inflammatory arthritis. However, it is currently unknown whether these alterations precede the development of arthritis or are rather a consequence of disease. Modulation of intestinal microbiota by oral antibiotics or germ-free condition can prevent arthritis in mice. Yet, the therapeu…
78	Goralska, K; Dzikowiec, M	ROLE OF MICROBIOTA IN MAINTAINING THE HOMEOSTASIS IN THE HUMAN BODY	POSTEPY MIKROBIOLOGII	Article	Medical University Lodz; Medical University Lodz	2018		The human body is believed to be occupied by around 4 x 10(13) microorganism cells, which is 10 times the number of cells of the human body. Multidisciplinary studies conducted worldwide by microbiologists and physicians suggest that the microorganisms which colonize the human body can more actively influence the state of health than previously thought. The most important role in the regulation o…
79	Wu, HL; Cai, LH; Li, DF; Wang, XY; Zhao, SC; Zou, FH; Zhou, K	Metagenomics Biomarkers Selected for Prediction of Three Different Diseases in Chinese Population	BIOMED RESEARCH INTERNATIONAL	Article	Huazhong University of Science & Technology; Beijing Genomics Institute (BGI); Beijing Genomics Institute (BGI); Guangdong Ocean University; Beijing Genomics Institute (BGI); Huazhong University of Science & Technology	2018	10.1155/2018/2936257	The dysbiosis of human microbiome has been proven to be associated with the development of many human diseases. Metagenome sequencing emerges as a powerful tool to investigate the effects of microbiome on diseases. Identification of human gut microbiome markers associated with abnormal phenotypes may facilitate feature selection for multiclass classification. Compared with binary classifiers, mul…
80	Lucas, S; Omata, Y; Hofmann, J; Bottcher, M; Iljazovic, A; Sarter, K; Albrecht, O; Schulz, O; Krishnacoumar, B; Kronke, G; Herrmann, M; Mougiakakos, D; Strowig, T; Schett, G; Zaiss, MM	Short-chain fatty acids regulate systemic bone mass and protect from pathological bone loss	NATURE COMMUNICATIONS	Article	University of Erlangen Nuremberg; University of Erlangen Nuremberg; University of Erlangen Nuremberg; University of Erlangen Nuremberg; Helmholtz Association; Helmholtz-Center for Infection Research	2018	10.1038/s41467-017-02490-4	Microbial metabolites are known to modulate immune responses of the host. The main metabolites derived from microbial fermentation of dietary fibers in the intestine, short-chain fatty acids (SCFA), affect local and systemic immune functions. Here we show that SCFA are regulators of osteoclast metabolism and bone mass in vivo. Treatment of mice with SCFA as well as feeding with a high-fiber diet …
81	Terato, K; Waritani, T; Fukai, R; Shionoya, H; Itoh, H; Katayama, K	Contribution of bacterial pathogens to evoking serological disease markers and aggravating disease activity in rheumatoid arthritis	PLOS ONE	Article	Asahikawa Medical College	2018	10.1371/journal.pone.0190588	Commensal bacteria and their pathogenic components in the gastrointestinal tract and oral cavity may play pathological roles in autoimmune diseases. To study the possible involvement of bacterial pathogens in autoimmune diseases, IgG and IgA antibodies against pathogenic components produced by three strains of commensal bacteria, Escherichia coli-lipopolysaccharide (E. coli-LPS), Porphyromonas gi…
82	Siala, M; Rihl, M; Sellami, H; Znazen, A; Sassi, N; Laadhar, L; Gdoura, R; Belghuith, I; Mrabet, D; Baklouti, S; Sellami, S; Sibilia, J; Fourati, H; Hammami, A; Cheour, I	Detection of Shigella spp. nucleic acids in the synovial tissue of Tunisian rheumatoid arthritis patients and other forms of arthritis by quantitative real-time polymerase chain reaction	RHEUMATOLOGY INTERNATIONAL	Article	Universite de Sfax; Universite de Sfax; Faculty of Sciences Sfax; Universite de Sfax; Hopital Habib Bourguiba; Universite de Tunis-El-Manar; Hopital La Rabta; Universite de Sfax; Universite de Sfax; Hopital Hedi Chaker; Institut National de la Sante et de la Recherche Medicale (Inserm); UDICE-French Research Universities; Universites de Strasbourg Etablissements Associes; Universite de Strasbourg	2018	10.1007/s00296-018-3939-y	Enterobacterial components in the joints of patients are believed to contribute to a perpetuating inflammation leading to a reactive arthritis (ReA), a condition in which microbial agents cannot be recovered from the joint. At present, it is unclear whether nucleic acids from Shigella spp. are playing a pathogenic role in causing not only ReA but also other forms of arthritis. Quantitative real-t…
83	Luo, Y; Blackledge, WC	Microbiome-based mechanisms hypothesized to initiate obesity-associated rheumatoid arthritis	OBESITY REVIEWS	Article	Sichuan University	2018	10.1111/obr.12671	Worldwide, the growing obesity pandemic contributes to a range of chronic diseases. Recent epidemiological studies have suggested an association between obesity and the development of rheumatoid arthritis ( RA), particularly among young women, whereby pro-inflammatory effects of adipokines provide one explanatory hypothesis. Yet, recent clinical and laboratory-based studies provide emerging evide…
84	Kim, DS; Kwon, JE; Lee, SH; Kim, EK; Ryu, JG; Jung, KA; Choi, JW; Park, MJ; Moon, YM; Park, SH; Cho, ML; Kwok, SK	Attenuation of Rheumatiod Inflammation by Soudium Butyrate Through Reciprocal Targeting of HDAC2 in Osteoclasts and HDAC8 in T Cells	FRONTIERS IN IMMUNOLOGY	Article	Catholic University of Korea; Harvard University; Harvard Medical School; Catholic University of Korea; Seoul St. Mary's Hospital; Catholic University of Korea; Catholic University of Korea	2018	10.3389/fimmu.2018.01525	Rheumatoid arthritis (RA) is a systemic autoimmune disease caused by both genetic and environmental factors. Recently, investigators have focused on the gut microbiota, which is thought to be an environmental factor that affects the development of RA. Metabolites secreted by the gut microbiota maintain homeostasis in the gut through various mechanisms [e.g., butyrate, which is one of the major me…
85	Jubair, WK; Hendrickson, JD; Severs, EL; Schulz, HM; Adhikari, S; Ir, D; Pagan, JD; Anthony, RM; Robertson, CE; Frank, DN; Banda, NK; Kuhn, KA	Modulation of Inflammatory Arthritis in Mice by Gut Microbiota Through Mucosal Inflammation and Autoantibody Generation	ARTHRITIS & RHEUMATOLOGY	Article	University of Colorado System; University of Colorado Anschutz Medical Campus; Harvard University; Massachusetts General Hospital	2018	10.1002/art.40490	Objective. Observations of microbial dysbiosis in patients with rheumatoid arthritis (RA) have raised interest in studying microbial-mucosal interactions as a potential trigger of RA. Using the murine collagen-induced arthritis (CIA) model, we undertook this study to test our hypothesis that microbiota modulate immune responses leading to autoimmune arthritis. Methods. CIA was induced by immuniza…
86	Kell, DB; Pretorius, E	No effects without causes: the Iron Dysregulation and Dormant Microbes hypothesis for chronic, inflammatory diseases	BIOLOGICAL REVIEWS	Article	University of Manchester; University of Manchester; Stellenbosch University	2018	10.1111/brv.12407	Since the successful conquest of many acute, communicable (infectious) diseases through the use of vaccines and antibiotics, the currently most prevalent diseases are chronic and progressive in nature, and are all accompanied by inflammation. These diseases include neurodegenerative (e.g. Alzheimer's, Parkinson's), vascular (e.g. atherosclerosis, pre-eclampsia, type 2 diabetes) and autoimmune (e.…
87	Shan, JJ; Peng, LX; Qian, WJ; Xie, T; Kang, A; Gao, B; Di, LQ	Integrated Serum and Fecal Metabolomics Study of Collagen-Induced Arthritis Rats and the Therapeutic Effects of the Zushima Tablet	FRONTIERS IN PHARMACOLOGY	Article	Nanjing University of Chinese Medicine; Nanjing University of Chinese Medicine; University of California System; University of California Davis	2018	10.3389/fphar.2018.00891	The Zushima tablet (ZT) has been used for decades in the clinical treatment of rheumatoid arthritis (RA) in China. However, its therapeutic mechanism is unclear. In this study, we aimed to explore the distinctive metabolic patterns in collagen-induced arthritis (CIA) rats and evaluate the therapeutic effects of ZT on RA using untargeted serum and fecal metabolomics approaches based on gas chromat…
88	Picchianti-Diamanti, A; Panebianco, C; Salemi, S; Sorgi, ML; Di Rosa, R; Tropea, A; Sgrulletti, M; Salerno, G; Terracciano, F; D'Amelio, R; Lagana, B; Pazienza, V	Analysis of Gut Microbiota in Rheumatoid Arthritis Patients: Disease-Related Dysbiosis and Modifications Induced by Etanercept	INTERNATIONAL JOURNAL OF MOLECULAR SCIENCES	Article	Sapienza University Rome; Azienda Ospedaliera Sant'Andrea; IRCCS Casa Sollievo Della Sofferenza	2018	10.3390/ijms19102938	A certain number of studies were carried out to address the question of how dysbiosis could affect the onset and development of rheumatoid arthritis (RA), but little is known about the reciprocal influence between microbiota composition and immunosuppressive drugs, and how this interaction may have an impact on the clinical outcome. The aim of this study was to characterize the intestinal microbi…
89	Yang, SK; Chen, HJ; Wei, B; Xiang, M; Hu, ZB; Peng, ZH; Lin, H; Sun, JC	Clindamycin Administration Increases the Incidence of Collagen-Induced Arthritis in Mice Through the Prolonged Impact of Gut Immunity	INFLAMMATION	Article	Guangdong Medical University; Guangdong Medical University	2018	10.1007/s10753-018-0833-4	The profound influence of gut flora on host immune system and its link with autoimmune disorders have been established. However, the role of certain antibiotic in progression of autoimmune disorder is still confusing. Here, we employed a collagen-induced arthritis (CIA) model to explore the role of clindamycin administration in different scenarios. In the first scenario, mice treated with antibio…
90	Petersson, S; Philippou, E; Rodomar, C; Nikiphorou, E	The Mediterranean diet, fish oil supplements and Rheumatoid arthritis outcomes: evidence from clinical trials	AUTOIMMUNITY REVIEWS	Article	University of Nicosia; University of London; King's College London; University of Nicosia; University of London; King's College London	2018	10.1016/j.autrev.2018.06.007	The impact of dietary interventions such as specific types of diet or nutritional supplements in rheumatoid arthritis (RA) has been subject to increased attention in recent years. The recognition of the unmet need to better understand the effects of specific dietary interventions on disease outcomes in RA, along with the growing patient interest on lifestyle interventions beyond pharmacotherapy, …
91	Stewart, L; Edgar, JDM; Blakely, G; Patrick, S	Antigenic mimicry of ubiquitin by the gut bacterium Bacteroides fragilis: a potential link with autoimmune disease	CLINICAL AND EXPERIMENTAL IMMUNOLOGY	Article	Queens University Belfast; University of Edinburgh; Queens University Belfast	2018	10.1111/cei.13195	Ubiquitin is highly conserved across eukaryotes and is essential for normal eukaryotic cell function. The bacterium Bacteroides fragilis is a member of the normal human gut microbiota, and the only bacterium known to encode a homologue of eukaryotic ubiquitin. The B. fragilis gene sequence indicates a past horizontal gene transfer event from a eukaryotic source. It encodes a protein (BfUbb) with …
92	Xiao, M; Fu, XP; Ni, YL; Chen, JF; Jian, SQ; Wang, LK; Li, L; Du, GK	Protective effects of Paederia scandens extract on rheumatoid arthritis mouse model by modulating gut microbiota	JOURNAL OF ETHNOPHARMACOLOGY	Article	Hainan Medical University; Hainan Medical University; Hainan Medical University	2018	10.1016/j.jep.2018.08.012	Ethnopharmacological relevance: Paederia scandens (Lour.) Merr. (P. scandens) has been traditionally used to treat the pain of rheumatism. Aim of the study: The purpose of this study was to investigate the possible influences of P. scandens on the progression of rheumatoid arthritis (RA), inflammatory responses and gut bacterial communities in RA mouse model. Materials and methods: collagen-induc…
93	Colucci, R; Pellegrini, C; Fornai, M; Tirotta, E; Antonioli, L; Renzulli, C; Ghelardi, E; Piccoli, E; Gentile, D; Benvenuti, L; Natale, G; Fulceri, F; Palazon-Riquelme, P; Lopez-Castejon, G; Blandizzi, C; Scarpignato, C	Pathophysiology of NSAID-Associated Intestinal Lesions in the Rat: Luminal Bacteria and Mucosal Inflammation as Targets for Prevention	FRONTIERS IN PHARMACOLOGY	Article	University of Padua; University of Pisa; University of Pisa; University of Manchester; University of Parma; University Hospital of Parma	2018	10.3389/fphar.2018.01340	Non-steroidal anti-inflammatory drugs (NSAIDs) can damage the small intestine, mainly through an involvement of enteric bacteria. This study examined the pathophysiology of NSAID-associated intestinal lesions in a rat model of diclofenac-enteropathy and evaluated the effect of rifaximin on small bowel damage. Enteropathy was induced in 40week old male rats by intragastric diclofenac (4 mg/kg BID,…
94	Evans-Marin, H; Rogier, R; Koralov, SB; Manasson, J; Roeleveld, D; van der Kraan, PM; Scher, JU; Koenders, MI; Abdollahi-Roodsaz, S	Microbiota-Dependent Involvement of Th17 Cells in Murine Models of Inflammatory Arthritis	ARTHRITIS & RHEUMATOLOGY	Article	New York University; Radboud University Nijmegen; Bristol-Myers Squibb; Celgene Corporation	2018	10.1002/art.40657	Objective Intestinal microbiota are associated with the development of inflammatory arthritis. The aim of this study was to dissect intestinal mucosal immune responses in the preclinical phase of arthritis and determine whether the presence of Th17 cells, beyond involvement of the cytokine interleukin-17 (IL-17), is required for arthritis development, and whether the involvement of Th17 cells in …
95	Maghsood, F; Mirshafiey, A; Farahani, MM; Modarressi, MH; Jafari, P; Motevaseli, E	Dual Effects of Cell Free Supernatants from Lactobacillus acidophilus and Lactobacillus rhamnosus GG in Regulation of MMP-9 by Up-Regulating TIMP-1 and Down-Regulating CD147 in PMA-Differentiated THP-1 Cells	CELL JOURNAL	Article	Tehran University of Medical Sciences; Tehran University of Medical Sciences; Islamic Azad University; Tehran University of Medical Sciences; Tehran University of Medical Sciences	2018	10.22074/cellj.2018.4447	Objective: Recent studies have reported dysregulated expression of matrix metalloproteinases (MMPs), especially MMP-2, MMP-9, tissue inhibitor of metalloproteinase-1, -2 (TIMP-1, TIMP-2), and extracellular matrix metalloproteinase inducer (EMMPRIN/CD147) in activated macrophages of patients with inflammatory diseases. Therefore, MMP-2, MMP-9, and their regulators may represent a new target for tr…
96	Forbes, JD; Chen, CY; Knox, NC; Marrie, RA; El-Gabalawy, H; de Kievit, T; Alfa, M; Bernstein, CN; Van Domselaar, G	A comparative study of the gut microbiota in immune-mediated inflammatory diseasesdoes a common dysbiosis exist?	MICROBIOME	Article	University of Manitoba; University of Manitoba; Public Health Agency of Canada; University of Manitoba; University of Manitoba; University of Manitoba; University of Manitoba; University of Toronto	2018	10.1186/s40168-018-0603-4	BackgroundImmune-mediated inflammatory disease (IMID) represents a substantial health concern. It is widely recognized that IMID patients are at a higher risk for developing secondary inflammation-related conditions. While an ambiguous etiology is common to all IMIDs, in recent years, considerable knowledge has emerged regarding the plausible role of the gut microbiome in IMIDs. This study used 1…
97	Bartels, LE; Pedersen, AB; Kristensen, NR; Jepsen, P; Vilstrup, H; Stengaard-Pedersen, K; Dahlerup, JF	Helicobacter pylori infection is not associated with rheumatoid arthritis	SCANDINAVIAN JOURNAL OF RHEUMATOLOGY	Article	Aarhus University; Aarhus University; Aarhus University	2019	10.1080/03009742.2018.1464205	Objective: Rheumatoid arthritis (RA) is an autoinflammatory disease caused by genetic susceptibility and environmental triggers, which include infectious agents. Helicobacter pylori, a bacterium that frequently colonizes the stomach, is associated with the development of certain autoinflammatory disorders. This study examined a possible association between H. pylori infection and RA. Method: This…
98	Wang, QQ; Xu, R	Data-driven multiple-level analysis of gut-microbiome-immune-joint interactions in rheumatoid arthritis	BMC GENOMICS	Article	Case Western Reserve University	2019	10.1186/s12864-019-5510-y	BackgroundRheumatoid arthritis (RA) is the most common autoimmune disease and affects about 1% of the population. The cause of RA remains largely unknown and could result from a complex interaction between genes and environment factors. Recent studies suggested that gut microbiota and their collective metabolic outputs exert profound effects on the host immune system and are implicated in RA. How…
99	Schmidt, TSB; Hayward, MR; Coelho, LP; Li, SS; Costea, PI; Voigt, AY; Wirbel, J; Maistrenko, OM; Alves, RJC; Bergsten, E; de Beaufort, C; Sobhani, I; Heintz-Buschart, A; Sunagawa, S; Zeller, G; Wilmes, P; Bork, P	Extensive transmission of microbes along the gastrointestinal tract	ELIFE	Article	European Molecular Biology Laboratory (EMBL); European Molecular Biology Laboratory (EMBL); Ruprecht Karls University Heidelberg; Ruprecht Karls University Heidelberg; Assistance Publique Hopitaux Paris (APHP); Universite Paris-Est-Creteil-Val-de-Marne (UPEC); Hopital Universitaire Henri-Mondor - APHP; Assistance Publique Hopitaux Paris (APHP); Universite Paris-Est-Creteil-Val-de-Marne (UPEC); Ho…	2019	10.7554/eLife.42693	The gastrointestinal tract is abundantly colonized by microbes, yet the translocation of oral species to the intestine is considered a rare aberrant event, and a hallmark of disease. By studying salivary and fecal microbial strain populations of 310 species in 470 individuals from five countries, we found that transmission to, and subsequent colonization of, the large intestine by oral microbes i…
100	Hui, WP; Yu, DP; Cao, Z; Zhao, XW	Butyrate inhibit collagen-induced arthritis via Treg/IL-10/Th17 axis	INTERNATIONAL IMMUNOPHARMACOLOGY	Article		2019	10.1016/j.intimp.2019.01.018	Rheumatoid arthritis (RA) is a chronic autoimmune disorder demanding the development of novel therapeutic strategy. Butyrate is a functional short-chain fatty acid produced by the anaerobic intestinal microbiota. This study aimed to investigate the attenuation of butyrate on RA. The collagen-induced arthritis (CIA) mouse model was established and butyrate was administered in drinking water along …
101	Lazar, B; Brenner, GB; Makkos, A; Balogh, M; Laszlo, SB; Al-Khrasani, M; Hutka, B; Bato, E; Ostorhazi, E; Juhasz, J; Kemeny, A; Laszlo, T; Tiszlavicz, L; Bihari, Z; Giricz, Z; Szabo, D; Helyes, Z; Ferdinandy, P; Gyires, K; Zadori, ZS	Lack of Small Intestinal Dysbiosis Following Long-Term Selective Inhibition of Cyclooxygenase-2 by Rofecoxib in the Rat	CELLS	Article	Semmelweis University; Szeged University; Szeged University; Semmelweis University; University of Pecs; University of Pecs; University of Pecs; University of Pecs; Szeged University; Pharmahungary Group	2019	10.3390/cells8030251	Intestinal dysbiosis is linked to numerous gastrointestinal disorders, including inflammatory bowel diseases. It is a question of debate if coxibs, selective inhibitors of cyclooxygenase (COX)-2, cause dysbiosis. Therefore, in the present study, we aimed to determine the effect of long-term (four weeks) selective inhibition of COX-2 on the small intestinal microbiota in the rat. In order to avoid…
102	Felix, KM; Teng, F; Bates, NA; Ma, HQ; Jaimez, IA; Sleiman, KC; Tran, NL; Wu, HJJ	P2RX7 Deletion in T Cells Promotes Autoimmune Arthritis by Unleashing the Tfh Cell Response	FRONTIERS IN IMMUNOLOGY	Article	University of Arizona; University of Arizona	2019	10.3389/fimmu.2019.00411	Rheumatoid arthritis (RA) is an autoimmune disease that affects similar to 1% of the world's population. B cells and autoantibodies play an important role in the pathogenesis of RA. The P2RX7 receptor is an ATP-gated cation channel and its activation results in the release of pro-inflammatory molecules. Thus, antagonists of P2RX7 have been considered to have potential as novel anti-inflammatory t…
103	Zhou, XY; Devescovi, V; Liu, YH; Dent, JE; Nardini, C	Host-Microbiome Synergistic Control on Sphingolipid Metabolism by Mechanotransduction in Model Arthritis	BIOMOLECULES	Article	University of California System; University of California San Francisco; Chinese Academy of Sciences; Shanghai Institutes for Biological Sciences, CAS; Max Planck Society; Chinese Academy of Sciences; University of Chinese Academy of Sciences, CAS; Chinese Academy of Sciences; Shanghai Institutes for Biological Sciences, CAS; Le Reseau International des Instituts Pasteur (RIIP); Karolinska Instit…	2019	10.3390/biom9040144	Chronic inflammatory autoimmune disorders are systemic diseases with increasing incidence and still lack a cure. More recently, attention has been placed in understanding gastrointestinal (GI) dysbiosis and, although important progress has been made in this area, it is currently unclear to what extent microbiome manipulation can be used in the treatment of autoimmune disorders. Via the use of app…
104	Doonan, J; Tarafdar, A; Pineda, MA; Lumb, FE; Crowe, J; Khan, AM; Hoskisson, PA; Harnett, MM; Harnett, W	The parasitic worm product ES-62 normalises the gut microbiota bone marrow axis in inflammatory arthritis	NATURE COMMUNICATIONS	Article	University of Strathclyde; University of Glasgow	2019	10.1038/s41467-019-09361-0	The human immune system has evolved in the context of our colonisation by bacteria, viruses, fungi and parasitic helminths. Reflecting this, the rapid eradication of pathogens appears to have resulted in reduced microbiome diversity and generation of chronically activated immune systems, presaging the recent rise of allergic, autoimmune and metabolic disorders. Certainly, gastrointestinal helmint…
105	Li, Y; Wang, HF; Li, X; Li, HX; Zhang, Q; Zhou, HW; He, Y; Li, P; Fu, C; Zhang, XH; Qiu, YR; Li, JL	Disordered intestinal microbes are associated with the activity of Systemic Lupus Erythematosus	CLINICAL SCIENCE	Article	Southern Medical University - China; Southern Medical University - China; Southern Medical University - China; Wenzhou Medical University; University of Plymouth	2019	10.1042/CS20180841	Intestinal dysbiosis is implicated in Systemic Lupus Erythematosus (SLE). However, the evidence of gut microbiome changes in SLE is limited, and the association of changed gut microbiome with the activity of SLE, as well as its functional relevance with SLE still remains unknown. Here, we sequenced 16S rRNA amplicon on fecal samples from 40 SLE patients (19 active patients, 21 remissive patients)…
106	Pedrogo, DAM; Chen, J; Hillmann, B; Jeraldo, P; Al-Ghalith, G; Taneja, V; Davis, JM; Knights, D; Nelson, H; Faubion, WA; Raffals, L; Kashyap, PC	An Increased Abundance of Clostridiaceae Characterizes Arthritis in Inflammatory Bowel Disease and Rheumatoid Arthritis: A Cross-sectional Study	INFLAMMATORY BOWEL DISEASES	Article	Mayo Clinic; University of Puerto Rico; University of Puerto Rico Medical Sciences Campus; Mayo Clinic; University of Minnesota System; University of Minnesota Twin Cities; Mayo Clinic; Mayo Clinic; Mayo Clinic; Mayo Clinic	2019	10.1093/ibd/izy318	Background: Inflammatory bowel diseases (IBDs) are a group of heterogeneous inflammatory conditions affecting the gastrointestinal tract. Although there is considerable evidence linking the gut microbiota to intestinal inflammation, there is limited knowledge on its potential role in the development of extraintestinal manifestations of IBD. Methods: Four groups of patients were included: IBD-asso…
107	Jeong, Y; Kim, JW; You, HJ; Park, SJ; Lee, J; Ju, JH; Park, MS; Jin, H; Cho, ML; Kwon, B; Park, SH; Ji, GE	Gut Microbial Composition and Function Are Altered in Patients with Early Rheumatoid Arthritis	JOURNAL OF CLINICAL MEDICINE	Article	BIFIDO Co. Ltd.; Seoul National University (SNU); Catholic University of Korea; Seoul St. Mary's Hospital; Seoul National University (SNU); Catholic University of Korea	2019	10.3390/jcm8050693	Rheumatoid arthritis (RA) is an autoimmune disease characterized by synovial inflammation of the joints and extra-articular manifestations. Recent studies have shown that microorganisms affect RA pathogenesis. However, few studies have examined the microbial distribution of early RA patients, particularly female patients. In the present study, we investigated the gut microbiome profile and microb…
108	Alpizar-Rodriguez, D; Lesker, TR; Gronow, A; Gilbert, B; Raemy, E; Lamacchia, C; Gabay, C; Finckh, A; Strowig, T	Prevotella copri in individuals at risk for rheumatoid arthritis	ANNALS OF THE RHEUMATIC DISEASES	Article	University of Geneva; Helmholtz Association; Helmholtz-Center for Infection Research; Hannover Medical School	2019	10.1136/annrheumdis-2018-214514	Objectives Rheumatoid arthritis (RA) has been associated with a relative expansion of faecal Prevotellaceae. To determine the microbiome composition and prevalence of Prevotella spp. in a group of individuals at increased risk for RA, but prior to the development of the disease. Methods I n an ongoing cohort study of first-degree relatives (FDRs) of patients with RA, we identified 'FDR controls',…
109	Marietta, E; Horwath, I; Balakrishnan, B; Taneja, V	Role of the intestinal microbiome in autoimmune diseases and its use in treatments	CELLULAR IMMUNOLOGY	Article	Mayo Clinic	2019	10.1016/j.cellimm.2018.10.005	The role of the intestinal microbiome in the pathogenesis of autoimmune diseases such as rheumatoid arthritis, multiple sclerosis, and type 1 diabetes is being increasingly appreciated. Many studies have reported that the compositions of the intestinal microbiomes of patients with these autoimmune diseases are different from those of healthy individuals. Analyses of the intestinal microbiome of h…
110	Longon, D; Kim, EY; Moudgil, KD	Modulation of autoimmune arthritis by environmental 'hygiene' and commensal microbiota	CELLULAR IMMUNOLOGY	Article	University System of Maryland; University of Maryland Baltimore; University System of Maryland; University of Maryland Baltimore; US Department of Veterans Affairs; Veterans Health Administration (VHA); Baltimore VA Medical Center; Washington State University	2019	10.1016/j.cellimm.2018.12.005	Observations in patients with autoimmune diseases and studies in animal models of autoimmunity have revealed that external environmental factors including exposure to microbes and the state of the host gut microbiota can influence susceptibility to autoimmunity and subsequent disease development. Mechanisms underlying these outcomes continue to be elucidated. These include deviation of the cytoki…
111	Wells, PM; Williams, FMK; Matey-Hernandez, ML; Menni, C; Steves, CJ	RA and the microbiome: do host genetic factors provide the link?	JOURNAL OF AUTOIMMUNITY	Article	Guy's & St Thomas' NHS Foundation Trust; University of London; King's College London; King's College Hospital NHS Foundation Trust; King's College Hospital; University of London; King's College London	2019	10.1016/j.jaut.2019.02.004	Rheumatoid arthritis (RA) is a chronic autoimmune disease, characterised by painful synovium inflammation, bony erosions, immune activation and the circulation of autoantibodies. Despite recent advances in therapeutics enabling disease suppression, there is a considerable demand for alternative therapeutic strategies as well as optimising those available at present. The relatively low concordance…
112	Peng, JN; Lu, XR; Xie, KL; Xu, YS; He, R; Guo, L; Han, YX; Wu, S; Dong, XR; Lu, Y; Liu, ZY; Cao, W; Gong, MX	Dynamic Alterations in the Gut Microbiota of Collagen-Induced Arthritis Rats Following the Prolonged Administration of Total Glucosides of Paeony	FRONTIERS IN CELLULAR AND INFECTION MICROBIOLOGY	Article	Capital Medical University; China Academy of Chinese Medical Sciences; Guang'anmen Hospital, CACMS	2019	10.3389/fcimb.2019.00204	Rheumatoid arthritis (RA) is a common autoimmune disease linked to chronic inflammation. Dysbiosis of the gut microbiota has been proposed to contribute to the risk of RA, and a large number of researchers have investigated the gut-joint axis hypothesis using the collagen-induced arthritis (CIA) rats. However, previous studies mainly involved short-term experiments; very few used the CIA model to…
113	Rogier, R; Ederveen, THA; Wopereis, H; Hartog, A; Boekhorst, J; van Hijum, SAFT; Knol, J; Garssen, J; Walgreen, B; Helsen, MM; van der Kraan, PM; van Lent, PLEM; van de Loo, FAJ; Abdollahi-Roodsaz, S; Koenders, MI	Supplementation of diet with non-digestible oligosaccharides alters the intestinal microbiota, but not arthritis development, in IL-1 receptor antagonist deficient mice	PLOS ONE	Article	Radboud University Nijmegen; Radboud University Nijmegen; Danone Nutricia; Wageningen University & Research; NIZO Food Research; Utrecht University	2019	10.1371/journal.pone.0219366	The intestinal microbiome is perturbed in patients with new-onset and chronic autoimmune inflammatory arthritis. Recent studies in mouse models suggest that development and progression of autoimmune arthritis is highly affected by the intestinal microbiome. This makes modulation of the intestinal microbiota an interesting novel approach to suppress inflammatory arthritis. Prebiotics, defined as n…
114	Pan, HD; Guo, RJ; Ju, YM; Wang, Q; Zhu, J; Xie, Y; Zheng, YF; Li, T; Liu, ZQ; Lu, LL; Li, F; Tong, B; Xiao, L; Xu, X; Leung, ELH; Li, RZ; Yang, HM; Wang, J; Zhou, H; Jia, HJ; Liu, L	A single bacterium restores the microbiome dysbiosis to protect bones from destruction in a rat model of rheumatoid arthritis	MICROBIOME	Article	Macau University of Science & Technology; Beijing Genomics Institute (BGI); Beijing Genomics Institute (BGI); Guangzhou University of Chinese Medicine; Fujian University of Traditional Chinese Medicine; Chinese Academy of Sciences; University of Chinese Academy of Sciences, CAS; Beijing Genomics Institute (BGI)	2019	10.1186/s40168-019-0719-1	Background: Early treatment is key for optimizing the therapeutic success of drugs, and the current initiating treatment that blocks the progression of bone destruction during the pre-arthritic stages remains unsatisfactory. The microbial disorder in rheumatoid arthritis (RA) patients is significantly reversed with effective treatment. Modulating aberrant gut microbiomes into a healthy state is a…
115	Sultan, AA; Mallen, C; Muller, S; Hider, S; Scott, I; Helliwell, T; Hall, LJ	Antibiotic use and the risk of rheumatoid arthritis: a population-based case-control study	BMC MEDICINE	Article	Keele University; UK Research & Innovation (UKRI); Biotechnology and Biological Sciences Research Council (BBSRC); Quadram Institute	2019	10.1186/s12916-019-1394-6	Background Antibiotic-induced disturbances of the human microbiota have been implicated in the development of chronic autoimmune conditions. This study aimed to assess whether antibiotic use is associated with the onset of rheumatoid arthritis (RA). Methods A nested case-control study was conducted utilising data from the primary care Clinical Practice Research Datalink (CPRD). Patients with an i…
116	Asquith, M; Sternes, PR; Costello, ME; Karstens, L; Diamond, S; Martin, TM; Li, ZX; Marshall, MS; Spector, TD; Cao, KAL; Rosenbaum, JT; Brown, MA	HLA Alleles Associated With Risk of Ankylosing Spondylitis and Rheumatoid Arthritis Influence the Gut Microbiome	ARTHRITIS & RHEUMATOLOGY	Article	Queensland University of Technology (QUT); Oregon Health & Science University; University of London; King's College London; University of Melbourne; Devers Eye Institute	2019	10.1002/art.40917	Objective HLA alleles affect susceptibility to more than 100 diseases, but the mechanisms that account for these genotype-disease associations are largely unknown. HLA alleles strongly influence predisposition to ankylosing spondylitis (AS) and rheumatoid arthritis (RA). Both AS and RA patients have discrete intestinal and fecal microbiome signatures. Whether these changes are the cause or conseq…
117	Huang, Y; Li, MF; Zhou, LL; Xu, DG; Qian, FY; Zhang, JF; Zhou, XP	Effects of Qingluo Tongbi Decoction on Gut Flora of Rats with Adjuvant-Induced Arthritis and the Underlying Mechanism	EVIDENCE-BASED COMPLEMENTARY AND ALTERNATIVE MEDICINE	Article	Nanjing University of Chinese Medicine; Nanjing University of Chinese Medicine; Nanjing University of Chinese Medicine	2019	10.1155/2019/6308021	Rheumatoid arthritis (RA) is a common chronic systemic autoimmune disease. Recent studies show that gut flora plays an important role in regulating the systemic immune response, and gut dysbacteria are linked with systemic chronic inflammation in the development of RA. Our previous results found that Qingluo Tongbi decoction (QLT) can treat RA effectively. The present study explored the effect of…
118	Hager, J; Bang, H; Hagen, M; Frech, M; Trager, P; Sokolova, MV; Steffen, U; Tascilar, K; Sarter, K; Schett, G; Rech, J; Zaiss, MM	The Role of Dietary Fiber in Rheumatoid Arthritis Patients: A Feasibility Study	NUTRIENTS	Article	University of Erlangen Nuremberg; University of Erlangen Nuremberg	2019	10.3390/nu11102392	Short-chain fatty acids are microbial metabolites that have been shown to be key regulators of the gut-joint axis in animal models. In humans, microbial dysbiosis was observed in rheumatoid arthritis (RA) patients as well as in those at-risk to develop RA, and is thought to be an environmental trigger for the development of clinical disease. At the same time, diet has a proven impact on maintaini…
119	Lee, JY; Mannaa, M; Kim, Y; Kim, J; Kim, GT; Seo, YS	Comparative Analysis of Fecal Microbiota Composition Between Rheumatoid Arthritis and Osteoarthritis Patients	GENES	Article	Pusan National University	2019	10.3390/genes10100748	The aim of this study was to investigate differences between the gut microbiota composition in patients with rheumatoid arthritis (RA) and those with osteoarthritis (OA). Stool samples from nine RA patients and nine OA patients were collected, and DNA was extracted. The gut microbiome was assessed using 16S rRNA gene amplicon sequencing. The structures and differences in the gut microbiome betwee…
120	Rodrigues, GSP; Cayres, LCF; Goncalves, FP; Takaoka, NNC; Lengert, AH; Tansini, A; Brisotti, JL; Sasdelli, CBG; de Oliveira, GLV	Detection of Increased Relative Expression Units of Bacteroides and Prevotella, and Decreased Clostridium leptum in Stool Samples from Brazilian Rheumatoid Arthritis Patients: A Pilot Study	MICROORGANISMS	Article	Hospital de Cancer de Barretos; Universidade Estadual Paulista	2019	10.3390/microorganisms7100413	Interactions between gut microbes and disease modifying antirheumatic drugs (DMARDs) have been proposed. The aim of the present study was to evaluate the presence of some specific bacteria in stool samples from Brazilian RA patients receiving DMARDs and correlate these data with diet, clinical parameters, and cytokines. Stool samples were used for gut bacteria evalutation by qPCR. Serum samples w…
121	Sun, Y; Chen, Q; Lin, P; Xu, R; He, DY; Ji, WQ; Bian, YQ; Shen, Y; Li, QT; Liu, C; Dong, K; Tang, YW; Pei, ZH; Yang, LY; Lu, HZ; Guo, XK; Xiao, LB	Characteristics of Gut Microbiota in Patients With Rheumatoid Arthritis in Shanghai, China	FRONTIERS IN CELLULAR AND INFECTION MICROBIOLOGY	Article	Shanghai Jiao Tong University; Shanghai Jiao Tong University; Memorial Sloan Kettering Cancer Center; New York University; New York University; Fudan University	2019	10.3389/fcimb.2019.00369	Little is known regarding differences in the gut microbiomes of rheumatoid arthritis (RA) patients and healthy cohorts in China. This study aimed to identify differences in the fecal microbiomes of 66 Chinese patients with RA and 60 healthy Chinese controls. The V3-V4 variable regions of bacterial 16S rRNA genes were sequenced with the Illumina system to define the bacterial composition. The alph…
122	Yue, MF; Tao, Y; Fang, YL; Lian, XP; Zhang, Q; Xia, YF; Wei, ZF; Dai, Y	The gut microbiota modulator berberine ameliorates collagen-induced arthritis in rats by facilitating the generation of butyrate and adjusting the intestinal hypoxia and nitrate supply	FASEB JOURNAL	Article	China Pharmaceutical University	2019	10.1096/fj.201900425RR	The commensal microbiota is one of the environmental triggers of rheumatoid arthritis (RA). Recent studies have identified the characteristics of the gut microbiota in patients with RA. However, it is still unclear how the microbiota can be modulated to slow down disease progression. In the present study, berberine, a modulator of gut microbiota with substantial anti-RA effect, was chosen to expl…
123	Chiang, HI; Li, JR; Liu, CC; Liu, PY; Chen, HH; Chen, YM; Lan, JL; Chen, DY	An Association of Gut Microbiota with Different Phenotypes in Chinese Patients with Rheumatoid Arthritis	JOURNAL OF CLINICAL MEDICINE	Article	National Chung Hsing University; National Chung Hsing University; National Chung Hsing University; National Chung Hsing University; National Chung Hsing University; National Chung Hsing University; Taichung Veterans General Hospital; Taichung Veterans General Hospital; National Yang Ming Chiao Tung University; China Medical University Taiwan; China Medical University Hospital - Taiwan; China Medi…	2019	10.3390/jcm8111770	We aimed to investigate the association of gut microbiota with disease activity, inflammatory parameters, and auto-antibodies profile in rheumatoid arthritis (RA). A total of 138 RA patients and 21 healthy controls (HC) were enrolled. Fecal samples were collected for bacterial DNA extraction and 16S ribosome (r)RNA sequencing, followed by analyses of gut microbiota composition. Serum levels of tu…
124	Guo, LX; Wang, HY; Liu, XD; Zheng, JY; Tang, Q; Wang, XN; Liu, JQ; Yin, HQ; Miao, B; Liang, YL; Liu, LF; Xin, GZ	Saponins from Clematis mandshurica Rupr. regulates gut microbiota and its metabolites during alleviation of collagen-induced arthritis in rats	PHARMACOLOGICAL RESEARCH	Article	China Pharmaceutical University; Hong Kong University of Science & Technology; Central South University; Jiangxi University of Traditional Chinese Medicine	2019	10.1016/j.phrs.2019.104459	Gut microbiota and their metabolites (short-chain fatty acids, SCFAs) are associated with the pathogenesis of rheumatoid arthritis (RA). Total Clematis triterpenoid saponins (CTSs) prepared from Clematis mandshurica Rupr. possess therapeutic benefits for arthritic diseases. However, the poor pharmacokinetic properties of CTSs have obstructed the translation of these natural agents to drugs. Here,…
125	Kalinkovich, A; Livshits, G	A cross talk between dysbiosis and gut-associated immune system governs the development of inflammatory arthropathies	SEMINARS IN ARTHRITIS AND RHEUMATISM	Article	Tel Aviv University; Sackler Faculty of Medicine	2019	10.1016/j.semarthrit.2019.05.007	Background: Emerging evidence suggests that dysbiosis, imbalanced gut microbial community, might be a key player in the development of various diseases, including inflammatory arthropathies, such as rheumatoid arthritis, spondyloarthritis (mainly, ankylosing spondylitis and psoriatic arthritis), and osteoarthritis. Yet, the underlying mechanisms and corresponding interactions remain poorly unders…
126	He, YQ; Wang, HH; Zheng, J; Beiting, DP; Masci, AM; Yu, H; Liu, KY; Wu, JM; Curtis, JL; Smith, B; Alekseyenko, AV; Obeid, JS	OHMI: the ontology of host-microbiome interactions	JOURNAL OF BIOMEDICAL SEMANTICS	Article	University of Michigan System; University of Michigan; Harbin Medical University; University of Pennsylvania; Pennsylvania Medicine; University of Pennsylvania; Duke University; Anhui Medical University; US Department of Veterans Affairs; Veterans Health Administration (VHA); VA Ann Arbor Healthcare System; State University of New York (SUNY) System; State University of New York (SUNY) Buffalo; M…	2019	10.1186/s13326-019-0217-1	Background Host-microbiome interactions (HMIs) are critical for the modulation of biological processes and are associated with several diseases. Extensive HMI studies have generated large amounts of data. We propose that the logical representation of the knowledge derived from these data and the standardized representation of experimental variables and processes can foster integration of data and…
127	Sredkova, P; Batsalova, T; Moten, D; Dzhambazov, B	Prebiotics can change immunomodulatory properties of probiotics	CENTRAL EUROPEAN JOURNAL OF IMMUNOLOGY	Article	Plovdiv University	2020	10.5114/ceji.2020.101237	Beneficial effects of probiotics and prebiotics are mainly related to modulation of compositions and activities of gut microbiota as well as manipulation of immunological reactivity in autoimmune diseases. In the present study, we examined whether metabolic products from different strains of Lactobacillus brevis cultured with different prebiotics have similar immunomodulating properties on immune…
128	Wang, Y; Li, HB; Wang, J; Zhao, J; Tie, N; Bai, LJ	Associations of Changes in Serum Inflammatory Factors, MMP-3, 25(OH)D and Intestinal Flora with Osteoporosis and Disease Activity in Rheumatoid Arthritis Patients	CLINICAL LABORATORY	Article	Inner Mongolia Medical University	2020	10.7754/Clin.Lab.2020.200242	Background: To explore the associations of changes in serum inflammatory factors, matrix metalloproteinase-3 (MMP-3), 25-hydroxy vitamin D [25(OH)D], and intestinal flora with osteoporosis and disease activity in rheumatoid arthritis (RA) patients, so as to provide references for clinical diagnosis and treatment. Methods: A total of 98 RA patients were selected as the objects of study (RA group),…
129	Jin, ZL; Chen, XC	Changes in intestinal florae and serum inflammation in rheumatoid arthritis rats and the effects of probiotics	EUROPEAN REVIEW FOR MEDICAL AND PHARMACOLOGICAL SCIENCES	Article	Jinzhou Medical University	2020	10.26355/eurrev_202011_23839	OBJECTIVE: The aim of this study was to explore the changes in intestinal florae and serum inflammation in rats with rheumatoid arthritis (RA), and to investigate the effects of probiotics. MATERIALS AND METHODS: A total of 30 Sprague Dawley (SD) rats were randomly divided into three groups, namely, control group, model group, and probiotic group. The rats in the model group were prepared into mo…
130	Rubin, KH; Rasmussen, NF; Petersen, I; Kopp, TI; Stenager, E; Magyari, M; Hetland, ML; Bygum, A; Glintborg, B; Andersen, V	Intake of dietary fibre, red and processed meat and risk of late-onset Chronic Inflammatory Diseases: A prospective Danish study on the diet, cancer and health cohort	INTERNATIONAL JOURNAL OF MEDICAL SCIENCES	Article	University of Southern Denmark; University of Southern Denmark; Odense University Hospital; Danish Cancer Society; Rigshospitalet; University of Copenhagen; University of Southern Denmark; University of Southern Denmark; University of Southern Denmark; Rigshospitalet; Rigshospitalet; University of Copenhagen; University of Southern Denmark; Odense University Hospital; University of Southern Denma…	2020	10.7150/ijms.49314	Background: Human and animal studies support the involvement of diet in the development of CID-chronic inflammatory diseases such as inflammatory bowel disease, psoriasis, rheumatoid arthritis, psoriatic arthritis, and multiple sclerosis. Objective: This cohort study aimed to investigate the association between intake of fibre, red and processed meat, and occurrence of late-onset CID (50+ years o…
131	Nemoto, N; Takeda, Y; Nara, H; Araki, A; Gazi, MY; Takakubo, Y; Naganuma, Y; Takagi, M; Asao, H	Analysis of intestinal immunity and flora in a collagen-induced mouse arthritis model: differences during arthritis progression	INTERNATIONAL IMMUNOLOGY	Article	Yamagata University; Yamagata University	2020	10.1093/intimm/dxz058	Intestinal immunity and flora are reported to be associated with the onset of rheumatoid arthritis. However, differences in the intestinal immunity and flora dynamics between the initial peak and relapse of arthritis have not been investigated. Here we analyzed the lymphocyte populations in different lymphoid tissues, the IgA in feces, and the intestinal flora at the initial peak and the relapse …
132	Ding, HD; Han, WL; Huang, MC; Hu, G; Lu, Y	ANALYSIS AND REGULATION THERAPY OF INTESTINAL FLORA IN 50 PATIENTS WITH RHEUMATOID ARTHRITIS	ACTA MEDICA MEDITERRANEA	Article		2020	10.19193/0393-6384_2020_2_151	Objective: To study and analyze the difference of intestinal flora between rheumatoid arthritis (RA) patients and healthy controls, explore the relationship between intestinal flora and the genesis and development of RA, and improve the conditions of RA patients based on diet regulation therapy. Methods: A total of 50 RA patients (RA group, average age: 56 years old) and 20 healthy controls (Con …
133	Kishikawa, T; Maeda, Y; Nii, T; Motooka, D; Matsumoto, Y; Matsushita, M; Matsuoka, H; Yoshimura, M; Kawada, S; Teshigawara, S; Oguro, E; Okita, Y; Kawamoto, K; Higa, S; Hirano, T; Narazaki, M; Ogata, A; Saeki, Y; Nakamura, S; Inohara, H; Kumanogoh, A; Takeda, K; Okada, Y	Metagenome-wide association study of gut microbiome revealed novel aetiology of rheumatoid arthritis in the Japanese population	ANNALS OF THE RHEUMATIC DISEASES	Article	Osaka University; Osaka University; Osaka University; Osaka University; Osaka University; Osaka University; Osaka University; Osaka University; Osaka University	2020	10.1136/annrheumdis-2019-215743	Objective The causality and pathogenic mechanism of microbiome composition remain elusive in many diseases, including autoimmune diseases such as rheumatoid arthritis (RA). This study aimed to elucidate gut microbiome's role in RA pathology by a comprehensive metagenome-wide association study (MWAS). Methods We conducted MWAS of the RA gut microbiome in the Japanese population (n(case)=82, n(cont…
134	Aa, LX; Fei, F; Qi, Q; Sun, RB; Gu, SH; Di, ZZ; Aa, JY; Wang, GJ; Liu, CX	Rebalancing of the gut flora and microbial metabolism is responsible for the anti-arthritis effect of kaempferol	ACTA PHARMACOLOGICA SINICA	Article	China Pharmaceutical University; Shanghai University of Traditional Chinese Medicine	2020	10.1038/s41401-019-0279-8	Kaempferol is a natural flavonol that possesses various pharmacological activities, including anti-arthritis effects, yet the underlying mechanisms remain controversial. To evaluate the anti-arthritis efficacy and the underlying mechanisms of kaempferol, collagen-induced arthritis (CIA) mice were treated with kaempferol intragastrically (200mg.kg(-1).d(-1)) and intraperitoneally (20mg.kg(-1).d(-1…
135	Munoz-Atienza, E; Flak, MB; Sirr, J; Paramonov, NA; Aduse-Opoku, J; Pitzalis, C; Curtis, MA	The P. gingivalis Autocitrullinome Is Not a Target for ACPA in Early Rheumatoid Arthritis	JOURNAL OF DENTAL RESEARCH	Article	University of London; Queen Mary University London; University of London; King's College London	2020	10.1177/0022034519898144	Rheumatoid arthritis (RA), a chronic inflammatory disease affecting primarily the joints, is frequently characterized by the presence of autoimmune anticitrullinated protein antibodies (ACPA) during preclinical stages of disease and accumulation of hypercitrullinated proteins in arthritic joints. A strong association has been reported between RA and periodontal disease, and Porphyromonas gingival…
136	Hammad, DBM; Hider, SL; Liyanapathirana, VC; Tonge, DP	Molecular Characterization of Circulating Microbiome Signatures in Rheumatoid Arthritis	FRONTIERS IN CELLULAR AND INFECTION MICROBIOLOGY	Article	Keele University; Keele University; University of Peradeniya	2020	10.3389/fcimb.2019.00440	Rheumatoid Arthritis (RA) has been increasingly associated with perturbations to the microbial communities that reside in and on the body (the microbiome), in both human and animal studies. To date, such studies have mainly focused on the microbial communities that inhabit the gut and oral cavity. Mounting evidence suggests that microbial DNA can be detected in the blood circulation using a range…
137	Maerz, JK; Trostel, C; Lange, A; Parusel, R; Michaelis, L; Schafer, A; Yao, H; Low, HC; Frick, JS	Bacterial Immunogenicity Is Critical for the Induction of Regulatory B Cells in Suppressing Inflammatory Immune Responses	FRONTIERS IN IMMUNOLOGY	Article	Eberhard Karls University of Tubingen	2020	10.3389/fimmu.2019.03093	B cells fulfill multifaceted functions that influence immune responses during health and disease. In autoimmune diseases, such as inflammatory bowel disease, multiple sclerosis and rheumatoid arthritis, depletion of functional B cells results in an aggravation of disease in humans and respective mouse models. This could be due to a lack of a pivotal B cell subpopulation: regulatory B cells (Bregs…
138	Zhang, LS; Song, PF; Zhang, XW; Metea, C; Schleisman, M; Karstens, L; Leung, E; Zhang, J; Xu, Q; Liu, Y; Asquith, M; Chu, CQ	Alpha-Glucosidase Inhibitors Alter Gut Microbiota and Ameliorate Collagen-Induced Arthritis	FRONTIERS IN PHARMACOLOGY	Article	Oregon Health & Science University; Sichuan University; US Department of Veterans Affairs; Veterans Health Administration (VHA); VA Portland Health Care System; Oregon Health & Science University; Oregon Health & Science University; University of Texas System; UTMD Anderson Cancer Center; Guangzhou University of Chinese Medicine	2020	10.3389/fphar.2019.01684	Acarose is an anti-diabetic drug and exhibits anti-arthritic effects. We hypothesized that acarbose influences the gut microbiota to affect the course of arthritis and tested this hypothesis in a collagen-induced arthritis (CIA) murine model. Acarbose in drinking water was administered via gastric gavage started prior to or at the time of CIA induction. Gut microbiota were evaluated with 16S rRNA…
139	Wang, BL; He, YJ; Tang, JF; Ou, QH; Lin, JP	Alteration of the gut microbiota in tumor necrosis factor-alpha antagonist-treated collagen-induced arthritis mice	INTERNATIONAL JOURNAL OF RHEUMATIC DISEASES	Article	Fujian Medical University; Fujian Medical University	2020	10.1111/1756-185X.13802	Aim Gut microbiota play an important role in rheumatoid arthritis (RA). Biological therapies targeting tumor necrosis factor-alpha (TNF-alpha) have been used for treatment in RA patients. However, whether TNF-alpha antagonist has some influence on gut microbiota is still unknown. This study aims to investigate the distribution of gut microbiota in collagen-induced arthritis (CIA) mice treated wit…
140	Milajerdi, A; Mousavi, SM; Sadeghi, A; Salari-Moghaddam, A; Parohan, M; Larijani, B; Esmaillzadeh, A	The effect of probiotics on inflammatory biomarkers: a meta-analysis of randomized clinical trials	EUROPEAN JOURNAL OF NUTRITION	Article	Tehran University of Medical Sciences; Tehran University of Medical Sciences; Tehran University of Medical Sciences; Tehran University of Medical Sciences; Tehran University of Medical Sciences; Isfahan University Medical Science	2020	10.1007/s00394-019-01931-8	Purpose No study has summarized earlier findings on the effect of probiotic supplementation on inflammatory biomarkers. This systematic review and meta-analysis was conducted to systematically review the available placebo-controlled clinical trials about the effect of probiotic supplementation on several inflammatory biomarkers in adults. Methods Relevant papers published up to March 2018 were se…
141	Li, XY; Lu, C; Fan, DP; Lu, XC; Xia, Y; Zhao, HY; Xu, HH; Zhu, YL; Li, JT; Liu, HL; Xiao, C	Human Umbilical Mesenchymal Stem Cells Display Therapeutic Potential in Rheumatoid Arthritis by Regulating Interactions Between Immunity and Gut Microbiota via the Aryl Hydrocarbon Receptor	FRONTIERS IN CELL AND DEVELOPMENTAL BIOLOGY	Article	China-Japan Friendship Hospital; China-Japan Friendship Hospital; Chinese Academy of Medical Sciences - Peking Union Medical College; Peking Union Medical College; China Academy of Chinese Medical Sciences; Institute of Basic Research In Clinical Medicine, CACMS; Beijing University of Chinese Medicine; China Academy of Chinese Medical Sciences; Experimental Research Center, CACMS; University of C…	2020	10.3389/fcell.2020.00131	Background Rheumatoid arthritis (RA) is an autoimmune disease that may be associated with gut microbiota via the aryl hydrocarbon receptor (AhR). Human umbilical mesenchymal stem cells (HUMSCs) have therapeutic potential against RA, but the underlying mechanism has not been fully elucidated. The purpose of this study was to explore the mechanism of action of HUMSCs in rats with collagen-induced a…
142	Ayyappan, P; Harms, RZ; Seifert, JA; Bemis, EA; Feser, ML; Deane, KD; Demoruelle, MK; Mikuls, TR; Holers, VM; Sarvetnick, NE	Heightened Levels of Antimicrobial Response Factors in Patients With Rheumatoid Arthritis	FRONTIERS IN IMMUNOLOGY	Article	University of Nebraska System; University of Nebraska Medical Center; Children's Hospital Colorado; University of Colorado System; University of Colorado Anschutz Medical Campus; Colorado School of Public Health; University of Colorado System; University of Colorado Anschutz Medical Campus; University of Nebraska System; University of Nebraska Medical Center; University of Nebraska System; Univer…	2020	10.3389/fimmu.2020.00427	Rheumatoid arthritis (RA) is a chronic progressive autoimmune disease leading to considerable disability over time. The disease can be characterized by the presence of multiple autoantibodies in the serum and synovial fluid. Microbial dysbiosis is proposed to play a role in the pathogenesis of RA. Increased systemic bacterial exposure leads to elevated levels of antimicrobial response factors (AR…
143	Fan, ZX; Yang, B; Ross, RP; Stanton, C; Zhao, JX; Zhang, H; Chen, W	The prophylactic effects of different Lactobacilli on collagen-induced arthritis in rats	FOOD & FUNCTION	Article	Jiangnan University; Jiangnan University; Jiangnan University; University College Cork; Teagasc; Jiangnan University; Beijing Technology & Business University	2020	10.1039/c9fo02556a	Recent studies have shed light on the prophylactic effects of Lactobacilli on rheumatoid arthritis (RA). However, the modulatory mechanisms of Lactobacilli remain unclear. The current study evaluated differentLactobacillusspecies' ability to alleviate arthritis induced by collagen. Rats were intragastrically administered different lactobacilli cocktails two weeks before arthritis induction. The r…
144	Mena-Vazquez, N; Ruiz-Limon, P; Moreno-Indias, I; Manrique-Arija, S; Tinahones, FJ; Fernandez-Nebro, A	Expansion of Rare and Harmful Lineages is Associated with Established Rheumatoid Arthritis	JOURNAL OF CLINICAL MEDICINE	Article	Universidad de Malaga; Universidad de Malaga; Hospital Virgen de la Victoria; CIBER - Centro de Investigacion Biomedica en Red; CIBEROBN; Universidad de Malaga	2020	10.3390/jcm9041044	Objectives: To characterize the gut microbiota profile in rheumatoid arthritis (RA) patients and investigate its association with certain characteristics of RA. Patients and methods: A nested case-control cohort of 40 patients with RA and 40 sex-age matched controls was studied. Subjects with diabetes, with any other inflammatory disease, practicing extreme diets, taking antibiotics, probiotics o…
145	Rosser, EC; Piper, CJM; Matei, DE; Blair, PA; Rendeiro, AF; Orford, M; Alber, DG; Krausgruber, T; Catalan, D; Klein, N; Manson, JJ; Drozdov, I; Bock, C; Wedderburn, LR; Eaton, S; Mauri, C	Microbiota-Derived Metabolites Suppress Arthritis by Amplifying Aryl-Hydrocarbon Receptor Activation in Regulatory B Cells	CELL METABOLISM	Article	University College London Hospitals NHS Foundation Trust; University of London; University College London; University of London; University College London; University of London; University College London; Austrian Academy of Sciences; CeMM Research Center for Molecular Medicine of the Austrian Academy of Sciences; University of London; University College London; Universidad de Chile; University o…	2020	10.1016/j.cmet.2020.03.003	The differentiation of IL-10-producing regulatory B cells (Bregs) in response to gut-microbiota-derived signals supports the maintenance of tolerance. However, whether microbiota-derived metabolites can modulate Breg suppressive function remains unknown. Here, we demonstrate that rheumatoid arthritis (RA) patients and arthritic mice have a reduction in microbial-derived short-chain fatty acids (S…
146	Tajik, N; Frech, M; Schulz, O; Schalter, F; Lucas, S; Azizov, V; Durholz, K; Steffen, F; Omata, Y; Rings, A; Bertog, M; Rizzo, A; Iljazovic, A; Basic, M; Kleyer, A; Culemann, S; Kronke, G; Luo, YB; Uberla, K; Gaipl, US; Frey, B; Strowig, T; Sarter, K; Bischoff, SC; Wirtz, S; Canete, JD; Ciccia, F; Schett, G; Zaiss, MM	Targeting zonulin and intestinal epithelial barrier function to prevent onset of arthritis	NATURE COMMUNICATIONS	Article	University of Erlangen Nuremberg; University of Erlangen Nuremberg; University Hohenheim; University of Erlangen Nuremberg; University of Palermo; Helmholtz Association; Helmholtz-Center for Infection Research; Hannover Medical School; University of Erlangen Nuremberg; University of Erlangen Nuremberg; University of Erlangen Nuremberg; University of Barcelona; Hospital Clinic de Barcelona; Univer…	2020	10.1038/s41467-020-15831-7	Gut microbial dysbiosis is associated with the development of autoimmune disease, but the mechanisms by which microbial dysbiosis affects the transition from asymptomatic autoimmunity to inflammatory disease are incompletely characterized. Here, we identify intestinal barrier integrity as an important checkpoint in translating autoimmunity to inflammation. Zonulin family peptide (zonulin), a pote…
147	Fan, ZX; Yang, B; Ross, RP; Stanton, C; Shi, GX; Zhao, JX; Zhang, H; Chen, W	Protective effects of Bifidobacterium adolescentis on collagen-induced arthritis in rats depend on timing of administration	FOOD & FUNCTION	Article	Jiangnan University; Jiangnan University; Jiangnan University; University College Cork; Teagasc; Nanjing Medical University; Jiangnan University; Beijing Technology & Business University	2020	10.1039/d0fo00077a	Emerging studies have addressed the role of probiotics in inflammation modulation via modifying gut microbiota. Perturbed gut microbiota is recognized as a pivotal trigger in the pathogenesis of rheumatoid arthritis (RA), and manipulating gut microbiota at the early phase may be helpful to alleviate the disease based on the fact that dysbiosis occurred prior to clinical arthritis. The current stu…
148	Smiljanovic, B; Grutzkau, A; Sorensen, T; Grun, JR; Vogl, T; Bonin, M; Schendel, P; Stuhlmuller, B; Claussnitzer, A; Hermann, S; Ohrndorf, S; Aupperle, K; Backhaus, M; Radbruch, A; Burmester, GR; Haupl, T	Synovial tissue transcriptomes of long-standing rheumatoid arthritis are dominated by activated macrophages that reflect microbial stimulation	SCIENTIFIC REPORTS	Article	Free University of Berlin; Humboldt University of Berlin; Charite Universitatsmedizin Berlin; University of Munster	2020	10.1038/s41598-020-64431-4	Advances in microbiome research suggest involvement in chronic inflammatory diseases such as rheumatoid arthritis (RA). Searching for initial trigger(s) in RA, we compared transcriptome profiles of highly inflamed RA synovial tissue (RA-ST) and osteoarthritis (OA)-ST with 182 selected reference transcriptomes of defined cell types and their activation by exogenous (microbial) and endogenous infla…
149	Armstrong, D; Dregan, A; Ashworth, M; White, P; McGee, C; de Lusignan, S	Influence of prior antibiotic use on risk of rheumatoid arthritis: case control study in general practice	RHEUMATOLOGY	Article	University of London; King's College London; University of London; King's College London; University of Surrey	2020	10.1093/rheumatology/kez452	Objectives. To test the hypothesis that prior antibiotics influences the risk of developing RA. Methods. A case-control study was conducted over 15 years using the UK's Royal College of General Practitioners Research and Surveillance Centre database. The frequency and type of antibiotic prescription for patients who subsequently developed RA were compared with antibiotic prescriptions in a contro…
150	Mankia, K; Di Matteo, A; Emery, P	Prevention and cure: The major unmet needs in the management of rheumatoid arthritis	JOURNAL OF AUTOIMMUNITY	Article	University of Leeds; Leeds Biomedical Research Centre; University of Leeds; Marche Polytechnic University	2020	10.1016/j.jaut.2019.102399	The outcome of treatment of patients with rheumatoid arthritis (RA) has qualitatively improved in recent years due to better and earlier treatment approaches, and new drugs. It is now generally accepted that the phenotype of RA is the end-point of a disease continuum. Large retrospective studies have identified anti-citrullinated protein antibodies (ACPAs) and rheumatoid factor in the stored seru…
151	Wells, PM; Adebayo, AS; Bowyer, RCE; Freidin, MB; Finckh, A; Strowig, T; Lesker, TR; Alpizar-Rodriguez, D; Gilbert, B; Kirkham, B; Cope, AP; Steves, CJ; Williams, FMK	Associations between gut microbiota and genetic risk for rheumatoid arthritis in the absence of disease: a cross-sectional study	LANCET RHEUMATOLOGY	Article	University of London; King's College London; University of London; King's College London; University of London; King's College London; University of Geneva; Helmholtz Association; Helmholtz-Center for Infection Research; Hannover Medical School; Guy's & St Thomas' NHS Foundation Trust; Guy's & St Thomas' NHS Foundation Trust	2020		Background Rheumatoid arthritis is a chronic inflammatory autoimmune disease that is associated with reduced life expectancy. The disease is heritable and an extensive repertoire of genetic variants have been identified. The gut microbiota might represent an environmental risk factor for rheumatoid arthritis. We aimed to assess whether known rheumatoid arthritis risk alleles were associated with …
152	Takahashi, D; Hoshina, N; Kabumoto, Y; Maeda, Y; Suzuki, A; Tanabe, H; Isobe, J; Yamada, T; Muroi, K; Yanagisawa, Y; Nakamura, A; Fujimura, Y; Saeki, A; Ueda, M; Matsumoto, R; Asaoka, H; Clarke, JM; Harada, Y; Umemoto, E; Komatsu, N; Okada, T; Takayanagi, H; Takeda, K; Tomura, M; Hase, K	Microbiota-derived butyrate limits the autoimmune response by promoting the differentiation of follicular regulatory T cells	EBIOMEDICINE	Article	Keio University; Keio University; Osaka University; RIKEN; Commonwealth Scientific & Industrial Research Organisation (CSIRO); Tokyo University of Science; Osaka University; University of Tokyo; University of Tokyo; RIKEN	2020	10.1016/j.ebiom.2020.102913	Background: Rheumatoid arthritis (RA) is a chronic debilitating autoimmune disorder with a high prevalence, especially in industrialized countries. Dysbiosis of the intestinal microbiota has been observed in RA patients. For instance, new-onset untreated RA (NORA) is associated with the underrepresentation of the Clostridium cluster XIVa, including Lachnospiraceae, which are major butyrate produc…
153	Liu, ZH; Wu, YX; Luo, YB; Wei, SX; Lu, CY; Zhou, Y; Wang, J; Miao, T; Lin, H; Zhao, Y; Liu, Q; Liu, Y	Self-Balance of Intestinal Flora in Spouses of Patients With Rheumatoid Arthritis	FRONTIERS IN MEDICINE	Article	Sichuan University; Southwest Medical University; Johns Hopkins University	2020	10.3389/fmed.2020.00538	We sought to characterize and assess differences in compositions of intestinal flora between patients with rheumatoid arthritis (RA) and their respective spouses. Eighty volunteers were recruited, including 30 pairs of RA patients and their spouses, and 20 healthy individuals. Fresh stool samples were collected, processed, and 16S rRNA-sequencing was performed. Data were analyzed using an operati…
154	Hagiwara, S; Nagata, K; Kasakura, K; Sakata, F; Kishino, S; Ogawa, J; Yashiro, T; Nishiyama, C	The anti-inflammatory effect of the gut lactic acid bacteria-generated metabolite 10-oxo-cis-6,trans-11-octadecadienoic acid on monocytes	BIOCHEMICAL AND BIOPHYSICAL RESEARCH COMMUNICATIONS	Article	Tokyo University of Science; Kyoto University	2020	10.1016/j.bbrc.2020.07.006	We evaluated the effect of gut bacterial metabolites of polyunsaturated fatty acids on inflammation and found that 10-oxo-cis-6,trans-11-octadecadienoic acid (gamma KetoC) strikingly suppressed LPS-induced IL-6 release from bone marrow-derived macrophages (BMMs), which was accompanied by reduced mRNA expression of Il6, TNF, and Il1b. gamma KetoC decreased the cAMP concentration in BMMs, suggestin…
155	Gusmao-Silva, G; Aguiar, SLF; Miranda, MCG; Guimaraes, MA; Alves, JL; Vieira, AT; Cara, DC; Miyoshi, A; Azevedo, VA; Oliveira, RP; Faria, AMC	Hsp65-ProducingLactococcocus lactisPrevents Antigen-Induced Arthritis in Mice	FRONTIERS IN IMMUNOLOGY	Article	Universidade Federal de Minas Gerais; Universidade Federal de Minas Gerais; Universidade Federal de Minas Gerais; Instituto Federal do Parana	2020	10.3389/fimmu.2020.562905	Oral tolerance is the physiological process that enables the immune system to differentiate between harmless dietary and microbiota antigens from pathogen derived antigens. It develops at the mucosal surfaces and can result in local and systemic regulatory and anti-inflammatory effects. Translation of these benefits to the clinical practice faces limitations involving specificity and doses of ant…
156	Wilson, TM; Trent, B; Kuhn, KA; Demoruelle, MK	Microbial Influences of Mucosal Immunity in Rheumatoid Arthritis	CURRENT RHEUMATOLOGY REPORTS	Article	Children's Hospital Colorado; University of Colorado System; University of Colorado Anschutz Medical Campus	2020	10.1007/s11926-020-00960-1	Purpose of Review This review will summarize recent data defining the relationship between rheumatoid arthritis (RA) and the microbiome at mucosal sites throughout the body. It will highlight what is known, what is speculated, and current knowledge gaps regarding the microbiome in RA. Recent Findings An extensive relationship between the microbiome and immune cell function can influence RA-relate…
157	Hamamoto, Y; Ouhara, K; Munenaga, S; Shoji, M; Ozawa, T; Hisatsune, J; Kado, I; Kajiya, M; Matsuda, S; Kawai, T; Mizuno, N; Fujita, T; Hirata, S; Tanimoto, K; Nakayama, K; Kishi, H; Sugiyama, E; Kurihara, H	Effect ofPorphyromonas gingivalisinfection on gut dysbiosis and resultant arthritis exacerbation in mouse model	ARTHRITIS RESEARCH & THERAPY	Article	Hiroshima University; Nagasaki University; University of Toyama; National Institute of Infectious Diseases (NIID); Hiroshima University; Nova Southeastern University; Hiroshima University	2020	10.1186/s13075-020-02348-z	Background Porphyromonas gingivalis(Pg) infection causes periodontal disease and exacerbates rheumatoid arthritis (RA). It is reported that inoculation of periodontopathogenic bacteria (i.e., Pg) can alter gut microbiota composition in the animal models. Gut microbiota dysbiosis in human has shown strong associations with systemic diseases, including RA, diabetes mellitus, and inflammatory bowel …
158	Schmidt, CJ; Wenndorf, K; Ebbers, M; Volzke, J; Muller, M; Strubing, J; Kriebel, K; Kneitz, S; Kreikemeyer, B; Muller-Hilke, B	Infection With Clostridioides difficile Attenuated Collagen-Induced Arthritis in Mice and Involved Mesenteric T-reg and T-h2 Polarization	FRONTIERS IN IMMUNOLOGY	Article	University of Rostock; University of Rostock; University of Rostock; University of Wurzburg; University of Rostock	2020	10.3389/fimmu.2020.571049	Objectives Rheumatoid arthritis is an autoimmune disease with multifactorial etiopathogenesis. Among the environmental factors, mucosal infections and the inducing pathobionts are gaining increasing attention. We here set out to explore the gut-joint-axis and the impact of Clostridioides difficile infection on subsequent arthritis. Methods We combined C. difficile infection in DBA/1J x B10.Q F1 m…
159	Xu, HH; Cao, JF; Li, XY; Lu, XC; Xia, Y; Fan, DP; Zhao, HY; Ju, DH; Xiao, C	Regional Differences in the Gut Microbiota and Gut-Associated Immunologic Factors in the Ileum and Cecum of Rats With Collagen-Induced Arthritis	FRONTIERS IN PHARMACOLOGY	Article	China Academy of Chinese Medical Sciences; Experimental Research Center, CACMS; China-Japan Friendship Hospital; Chinese Academy of Medical Sciences - Peking Union Medical College; Institute of Medicinal Plant Development - CAMS; Peking Union Medical College; Beijing University of Chinese Medicine; China-Japan Friendship Hospital	2020	10.3389/fphar.2020.587534	Rheumatoid arthritis (RA) is a common autoimmune disease characterized by chronic inflammation and a multifactorial etiology. We previously showed that gut microbiota dysbiosis in the rat ileum is involved in the development of collagen-induced arthritis (CIA). The gut microbiota in the distinct gastrointestinal tract (GIT) plays region-specific roles, but information on the different roles of th…
160	Nguyen, Y; Mariette, X; Salliot, C; Gusto, G; Boutron-Ruault, MC; Seror, R	Chronic diarrhoea and risk of rheumatoid arthritis: findings from the French E3N-EPIC Cohort Study	RHEUMATOLOGY	Article	Institut National de la Sante et de la Recherche Medicale (Inserm); UDICE-French Research Universities; Universite Paris Saclay; Assistance Publique Hopitaux Paris (APHP); Hopital Universitaire Beaujon - APHP; UDICE-French Research Universities; Universite Paris Cite; Assistance Publique Hopitaux Paris (APHP); Hopital Universitaire Bicetre - APHP; Hopital Universitaire Paul-Brousse - APHP; UDICE-…	2020	10.1093/rheumatology/keaa133	Objectives. To assess the relationship between gastrointestinal disorders and the risk of further development of RA. Methods. The Etude Epidemiologique aupres des femmes de la Mutuelle generale de ('Education NationaleEuropean Prospective Investigation into Cancer and Nutrition Study is a French prospective cohort including 98 995 healthy women since 1990. Participants completed mailed questionna…
161	Qiao, SM; Lian, XP; Yue, MF; Zhang, Q; Wei, ZF; Chen, L; Xia, YF; Dai, Y	Regulation of gut microbiota substantially contributes to the induction of intestinal Treg cells and consequent anti-arthritis effect of madecassoside	INTERNATIONAL IMMUNOPHARMACOLOGY	Article	China Pharmaceutical University; China Pharmaceutical University	2020	10.1016/j.intimp.2020.107047	Previously, we reported that oral administration of madecassoside, the main active triterpene in Centella asiatica L., exerted anti-arthritis effect by inducing the generation of regulatory T (Treg) cells in small intestine. This study investigates the action site and mechanism of madecassoside to induce Treg cells. In collagen-induced arthritis (CIA) of rats, oral administration of madecassoside…
162	Diamanti, AP; Panebianco, C; Salerno, G; Di Rosa, R; Salemi, S; Sorgi, ML; Meneguzzi, G; Mariani, MB; Rai, A; Iacono, D; Sesti, G; Pazienza, V; Lagana, B	Impact of Mediterranean Diet on Disease Activity and Gut Microbiota Composition of Rheumatoid Arthritis Patients	MICROORGANISMS	Article	Sapienza University Rome; Azienda Ospedaliera Sant'Andrea; IRCCS Casa Sollievo Della Sofferenza	2020	10.3390/microorganisms8121989	Rheumatoid arthritis (RA) is an autoimmune disorder in which gut and oral microbiota play a crucial role. Diet is a modifiable factor that can influence both microbiota composition and arthritis outcome; previous studies have suggested associations between dietary habits and RA, with contrasting results. We investigate the protective effect of the Mediterranean diet (MD) on disease activity and t…
163	Kronzer, VL; Bridges, SL; Davis, JM	Why women have more autoimmune diseases than men: An evolutionary perspective	EVOLUTIONARY APPLICATIONS	Article	Mayo Clinic; University of Alabama System; University of Alabama Birmingham	2021	10.1111/eva.13167	Women have up to a fourfold increase in risk for autoimmune disease compared to men. Many explanations have been proposed, including sex hormones, the X chromosome, microchimerism, environmental factors, and the microbiome. However, the mechanism for this autoimmune sex bias remains obscure. In this manuscript, we evaluate the hypothesis that qualitative or quantitative differences in circulating…
164	Gilbert, BTP; Lamacchia, C; Mongin, D; Lauper, K; Trunk, E; Studer, O; Courvoisier, DS; Rubbert-Roth, A; Kyburz, D; Moeller, B; Finckh, A	Cohort profile: SCREEN-RA: design, methods and perspectives of a Swiss cohort study of first-degree relatives of patients with rheumatoid arthritis	BMJ OPEN	Article	University of Geneva; University of Manchester; Kantonsspital St. Gallen; University of Basel; University of Bern; University Hospital of Bern	2021	10.1136/bmjopen-2020-048409	Purpose Rheumatoid arthritis (RA) is an insidious autoimmune disease, with an immunological onset years before diagnosis. Early interventions in preclinical stages could prevent or minimise the progression towards irreversible joint damage. The SCREEN-RA cohort (Evaluation of a SCREENing strategy for Rheumatoid Arthritis) aims to characterise the preclinical stages of the disease, to identify env…
165	Hartmann, AM; Dell'Oro, M; Kessler, CS; Schumann, D; Steckhan, N; Jeitler, M; Fischer, JM; Spoo, M; Kriegel, MA; Schneider, JG; Haupl, T; Kandil, FI; Michalsen, A; Koppold-Liebscher, DA	Efficacy of therapeutic fasting and plant-based diet in patients with rheumatoid arthritis (NutriFast): study protocol for a randomised controlled clinical trial	BMJ OPEN	Article	Free University of Berlin; Humboldt University of Berlin; University of Munster; Yale University; Universitatsklinikum des Saarlandes; Saarland University; University of Luxembourg; Free University of Berlin; Humboldt University of Berlin; Charite Universitatsmedizin Berlin	2021	10.1136/bmjopen-2020-047758	Background Previous studies have shown beneficial effects of therapeutic fasting and plant-based dietary interventions on disease activity in patients with rheumatoid arthritis (RA) for a duration of up to 1 year. To date, the effects of such interventions on the gut microbiome and on modern diagnostic markers in patients with RA have not been studied. This trial aims to investigate the clinical …
166	Bai, YQ; Li, YH; Marion, T; Tong, YL; Zaiss, MM; Tang, ZG; Zhang, QP; Liu, Y; Luo, YB	Resistant starch intake alleviates collagen-induced arthritis in mice by modulating gut microbiota and promoting concomitant propionate production	JOURNAL OF AUTOIMMUNITY	Article	Sichuan University; Shanxi Medical University; University of Tennessee System; University of Tennessee Health Science Center; University of Erlangen Nuremberg	2021	10.1016/j.jaut.2020.102564	Gut dysbiosis precedes clinic symptoms in rheumatoid arthritis (RA) and has been implicated in the initiation and persistence of RA. The early treatment of RA is critical to better clinical outcome especially for joint destruction. Although dietary interventions have been reported to be beneficial for RA patients, it is unclear to whether diet-induced gut microbiome changes can be a preventive st…
167	Li, Y; Zhang, SX; Yin, XF; Zhang, MX; Qiao, J; Xin, XH; Chang, MJ; Gao, C; Li, YF; Li, XF	The Gut Microbiota and Its Relevance to Peripheral Lymphocyte Subpopulations and Cytokines in Patients with Rheumatoid Arthritis	JOURNAL OF IMMUNOLOGY RESEARCH	Article	Shanxi Medical University; Shanxi Medical University; Shanxi Medical University; Shanxi People's Hospital; Harvard University; Brigham & Women's Hospital; Harvard Medical School	2021	10.1155/2021/6665563	Growing experimental and clinical evidence suggests that a chronic inflammatory response induced by gut microbiome critically contribute to the development of rheumatoid arthritis (RA). Previous studies demonstrated the disturbance of lymphocyte subpopulations in RA patients. The purpose of this study was to explore the characteristics of gut microbiome and the associations between bacterium and …
168	Iljazovic, A; Amend, L; Galvez, EJC; de Oliveira, R; Strowig, T	Modulation of inflammatory responses by gastrointestinal Prevotella spp. - From associations to functional studies	INTERNATIONAL JOURNAL OF MEDICAL MICROBIOLOGY	Article	Helmholtz Association; Helmholtz-Center for Infection Research; Hannover Medical School	2021	10.1016/j.ijmm.2021.151472	Numerous studies have associated alterations in the gut microbiota composition with almost every known inflammatory disease. However, proving the biological relevance of distinct microbial signatures and linking specific microorganisms to host phenotypes, remains a considerable challenge. Correspondingly, increased abundance of members of Prevotella genus within microbial communities colonizing d…
169	Kurilshikov, A; Medina-Gomez, C; Bacigalupe, R; Radjabzadeh, D; Wang, J; Demirkan, A; Le Roy, CI; Garay, JAR; Finnicum, CT; Liu, XR; Zhernakova, DV; Bonder, MJ; Hansen, TH; Frost, F; Ruhlemann, MC; Turpin, W; Moon, JY; Kim, HN; Lull, K; Barkan, E; Shah, SA; Fornage, M; Szopinska-Tokov, J; Wallen, ZD; Borisevich, D; Agreus, L; Andreasson, A; Bang, C; Bedrani, L; Bell, JT; Bisgaard, H; Boehnke, M; …	Large-scale association analyses identify host factors influencing human gut microbiome composition	NATURE GENETICS	Article	University of Groningen; Erasmus University Rotterdam; Erasmus MC; Erasmus University Rotterdam; Erasmus MC; KU Leuven; Flanders Institute for Biotechnology (VIB); Chinese Academy of Sciences; Institute of Microbiology, CAS; University of Surrey; University of London; King's College London; University of Toronto; University of Toronto; University Toronto Affiliates; Sinai Health System Toronto; L…	2021	10.1038/s41588-020-00763-1	To study the effect of host genetics on gut microbiome composition, the MiBioGen consortium curated and analyzed genome-wide genotypes and 16S fecal microbiome data from 18,340 individuals (24 cohorts). Microbial composition showed high variability across cohorts: only 9 of 410 genera were detected in more than 95% of samples. A genome-wide association study of host genetic variation regarding mi…
170	Langan, D; Perkins, DJ; Vogel, SN; Moudgil, KD	Microbiota-Derived Metabolites, Indole-3-aldehyde and Indole-3-acetic Acid, Differentially Modulate Innate Cytokines and Stromal Remodeling Processes Associated with Autoimmune Arthritis	INTERNATIONAL JOURNAL OF MOLECULAR SCIENCES	Article	University System of Maryland; University of Maryland Baltimore; US Department of Veterans Affairs; Veterans Health Administration (VHA); Baltimore VA Medical Center; University System of Maryland; University of Maryland Baltimore	2021	10.3390/ijms22042017	Rheumatoid arthritis (RA) is an autoimmune disease characterized by chronic inflammation of the synovial joints. Inflammation, new blood vessel formation (angiogenesis) and bone resorption (osteoclastogenesis) are three key processes involved in the joint damage and deformities of arthritis. Various gut microbiota-derived metabolites are implicated in RA pathogenesis. However, there is barely any…
171	Kim, JW; Jeong, Y; Park, SJ; Jin, H; Lee, J; Ju, JH; Ji, GE; Park, SH	Influence of proton pump inhibitor or rebamipide use on gut microbiota of rheumatoid arthritis patients	RHEUMATOLOGY	Article	Catholic University of Daegu; Seoul National University (SNU); BIFIDO Co. Ltd.; Catholic University of Korea; Seoul St. Mary's Hospital	2021	10.1093/rheumatology/keaa316	Objective Patients with RA commonly use gastrointestinal (GI) protective drugs for treatment and prevention of drug-associated GI injuries. However, how these drugs affect the gut microbiota in RA patients remains unknown. The objective of this study was to examine the gut microbiota of RA patients according to use of GI protective drugs such as proton pump inhibitors (PPIs), histamine 2-receptor…
172	Wang, HH; Ong, E; Kao, JY; Sun, DX; He, YQ	Reverse Microbiomics: A New Reverse Dysbiosis Analysis Strategy and Its Usage in Prediction of Autoantigens and Virulent Factors in Dysbiotic Gut Microbiomes From Rheumatoid Arthritis Patients	FRONTIERS IN MICROBIOLOGY	Article	Harbin Medical University; University of Michigan System; University of Michigan; University of Michigan System; University of Michigan; University of Michigan System; University of Michigan; University of Michigan System; University of Michigan; University of Michigan System; University of Michigan; University of Michigan System; University of Michigan	2021	10.3389/fmicb.2021.633732	Alterations in the gut microbiome have been associated with various human diseases. Most existing gut microbiome studies stopped at the stage of identifying microbial alterations between diseased or healthy conditions. As inspired by reverse vaccinology (RV), we developed a new strategy called Reverse Microbiomics (RM) that turns this process around: based on the identified microbial alternations…
173	Guo, DG; Lv, JH; Chen, X; Yan, XX; Ma, FL; Liu, YY; Chen, X; Xie, J; Zhang, MZ; Jin, ZY; Cai, LJ; Sun, XC; Niu, DS; Duan, DD	Study of miRNA interactome in active rheumatoid arthritis patients reveals key pathogenic roles of dysbiosis in the infection-immune network	RHEUMATOLOGY	Article	Ningxia Medical University; Southwest Medical University	2021	10.1093/rheumatology/keaa369	Objectives. To characterize serum microRNA (miR) and the miR interactome of active RA patients in RA aetiology and pathogenesis. Methods. The differentially expressed miRs (DEmiRs) in serum of naive active RA patients (NARAPs, n = 9, into three pools) vs healthy controls (HCs, n = 15, into five pools) were identified with Agilent human miR microarray analysis. Candidate driver genes in epigenetic…
174	Bates, NA; Li, AN; Fan, TT; Cutcliffe, MP; Dagenet, CB; Sleiman, KC; Ma, HQ; Tahsin, S; Garrett, CS; Altemus, J; Wu, HJJ	Gut Commensal Segmented Filamentous Bacteria Fine-Tune T Follicular Regulatory Cells to Modify the Severity of Systemic Autoimmune Arthritis	JOURNAL OF IMMUNOLOGY	Article	University of Arizona; University of Arizona	2021	10.4049/jimmunol.2000663	Autoantibodies play a major pathogenic role in rheumatoid arthritis. T follicular helper (Tfh) cells promote germinal center B cell and Ab responses. Excessive Tfh cell responses lead to autoimmunity, and therefore, counterregulation is crucial. T follicular regulatory (Tfr) cells, mainly differentiated from T regulatory cells, can negatively regulate Tfh and germinal center B cells. Dysbiosis is…
175	Volkova, A; Ruggles, KV	Predictive Metagenomic Analysis of Autoimmune Disease Identifies Robust Autoimmunity and Disease Specific Microbial Signatures	FRONTIERS IN MICROBIOLOGY	Article	New York University; New York University	2021	10.3389/fmicb.2021.621310	Within the last decade, numerous studies have demonstrated changes in the gut microbiome associated with specific autoimmune diseases. Due to differences in study design, data quality control, analysis and statistical methods, many results of these studies are inconsistent and incomparable. To better understand the relationship between the intestinal microbiome and autoimmunity, we have completed…
176	Nayak, RR; Alexander, M; Deshpande, I; Stapleton-Gray, K; Rimal, B; Patterson, AD; Ubeda, C; Scher, JU; Turnbaugh, PJ	Methotrexate impacts conserved pathways in diverse human gut bacteria leading to decreased host immune activation	CELL HOST & MICROBE	Article	University of California System; University of California San Francisco; University of California System; University of California San Francisco; Pennsylvania Commonwealth System of Higher Education (PCSHE); Pennsylvania State University; Pennsylvania State University - University Park; CIBER - Centro de Investigacion Biomedica en Red; CIBERESP; New York University	2021	10.1016/j.chom.2020.12.008	Immunomodulatory drugs can inhibit bacterial growth, yet their mechanism of action, spectrum, and clinical relevance remain unknown. Methotrexate (MTX), a first-line rheumatoid arthritis (RA) treatment, inhibits mammalian dihydrofolate reductase (DHFR), but whether it directly impacts gut bacteria is unclear. We show that MTX broadly alters the human gut microbiota. Drug sensitivity varied across…
177	Liu, J; Tan, YZ; Ao, H; Feng, WW; Peng, C	Aqueous extracts of Aconite promote thermogenesis in rats with hypothermia via regulating gut microbiota and bile acid metabolism	CHINESE MEDICINE	Article	Chengdu University of Traditional Chinese Medicine; Chengdu University of Traditional Chinese Medicine	2021	10.1186/s13020-021-00437-y	Background: Intermittent or prolonged exposure to severe cold stress disturbs energy homeostasis and can lead to hypothermia, heart failure, Alzheimer's disease, and so on. As the typical hot traditional Chinese medicine, Aconite has been widely used to treat cold-associated diseases for thousands of years, but its critical mechanisms for the promotion of thermogenesis are not fully resolved. Gut…
178	Li, YZ; Dai, MX; Wang, LL; Wang, GD	Polysaccharides and glycosides from Aralia echinocaulis protect rats from arthritis by modulating the gut microbiota composition	JOURNAL OF ETHNOPHARMACOLOGY	Article	Anhui University of Chinese Medicine; Wannan Medical College	2021	10.1016/j.jep.2020.113749	Ethnopharmacological relevance: Aralia echinocaulis has been used in traditional medicines in China and exhibits good effects on rheumatoid arthritis (RA). Aim of the study: Aralia echinocaulis is rich in polysaccharides and glycosides. This study aims to explore the effect of total polysaccharide and glycoside (TPG) from A. echinocaulis on an RA rat model and the role of alterations in gut micro…
179	Kitamura, K; Sasaki, M; Matsumoto, M; Shionoya, H; Iida, K	Protective effect of Bacteroides fragilis LPS on Escherichia coli LPS-induced inflammatory changes in human monocytic cells and in a rheumatoid arthritis mouse model	IMMUNOLOGY LETTERS	Article	Ochanomizu University; Ochanomizu University	2021	10.1016/j.imlet.2021.03.008	It has been reported that patients with rheumatoid arthritis (RA) have significantly less bacteria belonging to the Bacteroides group in their microbiota. We speculate that inhibition of cytokine production is impaired in patients with RA owing to their low levels of intestinal bacteria belonging to the Bacteroidetes group. Here we investigated the effect of Bacteroides fragilis lipopolysaccharid…
180	Ashaolu, TJ; Fernandez-Tome, S	Gut mucosal and adipose tissues as health targets of the immunomodulatory mechanisms of probiotics	TRENDS IN FOOD SCIENCE & TECHNOLOGY	Article	Duy Tan University; Duy Tan University; Consejo Superior de Investigaciones Cientificas (CSIC); CSIC-UAM - Instituto de Investigacion en Ciencias de la Alimentacion (CIAL); CIBER - Centro de Investigacion Biomedica en Red; CIBEREHD; Hospital de La Princesa	2021	10.1016/j.tifs.2021.04.040	Background: Immune balance and homeostasis at mucosal surfaces is a delicate process which could be modulated within the gut by introduced or resident probiotics. Consumption of probiotics is meant to augment the normal intestinal probiotic microbes in a commensal or symbiotic relationship via cellular and humoral immunomodulation, tissue-mediated resistance of pathogenic colonization, improvemen…
181	Artacho, A; Isaac, S; Nayak, R; Flor-Duro, A; Alexander, M; Koo, I; Manasson, J; Smith, PB; Rosenthal, P; Homsi, Y; Gulko, P; Pons, J; Puchades-Carrasco, L; Izmirly, P; Patterson, A; Abramson, SB; Pineda-Lucena, A; Turnbaugh, PJ; Ubeda, C; Scher, JU	The Pretreatment Gut Microbiome Is Associated With Lack of Response to Methotrexate in New-Onset Rheumatoid Arthritis	ARTHRITIS & RHEUMATOLOGY	Article	University of California System; University of California San Francisco; Pennsylvania Commonwealth System of Higher Education (PCSHE); Pennsylvania State University; Pennsylvania State University - University Park; New York University; Icahn School of Medicine at Mount Sinai; Prince Felipe Research Center; University of Navarra; CIBER - Centro de Investigacion Biomedica en Red; CIBERESP	2021	10.1002/art.41622	Objective Although oral methotrexate (MTX) remains the anchor drug for rheumatoid arthritis (RA), up to 50% of patients do not achieve a clinically adequate outcome. In addition, there is a lack of prognostic tools for treatment response prior to drug initiation. This study was undertaken to investigate whether interindividual differences in the human gut microbiome can aid in the prediction of M…
182	Balakrishnan, B; Luckey, D; Bodhke, R; Chen, J; Marietta, E; Jeraldo, P; Murray, J; Taneja, V	Prevotella histicola Protects From Arthritis by Expansion of Allobaculum and Augmenting Butyrate Production in Humanized Mice	FRONTIERS IN IMMUNOLOGY	Article	Mayo Clinic; Department of Biotechnology (DBT) India; National Centre for Cell Science, Pune (NCCS); Mayo Clinic; Mayo Clinic; Mayo Clinic	2021	10.3389/fimmu.2021.609644	Bacterial therapeutics are the emergent alternatives in treating autoimmune diseases such as Rheumatoid Arthritis [RA]. P. histicola MCI 001 is one such therapeutic bacterium that has been proven to treat autoimmune diseases such as RA and multiple sclerosis [MS] in animal models. The present study characterized P. histicola MCI 001 isolated from a human duodenal biopsy, and evaluated its impact …
183	Lu, CY; Chen, J; Yi, CM; Han, JJ; Shi, QY; Li, JJ; Liu, B; Zhou, J; Su, XR	Gut microbiota mediated the protective effects of tuna oil on collagen-induced arthritis in mice	FOOD & FUNCTION	Article	Ningbo University; Ningbo University	2021	10.1039/d1fo00709b	Rheumatoid arthritis is emerging as a chronic autoimmune disease worldwide. In this study, the beneficial effects of tuna oil (TO) on collagen-induced arthritis (CIA) mice were investigated. Dietary administration of TO relieved arthritis severity and joint bone erosion, and ameliorated systemic inflammation. Furthermore, TO treatments regulated the phosphorylation of nuclear factor-kappa B (NF-k…
184	Mangalea, MR; Paez-Espino, D; Kieft, K; Chatterjee, A; Chriswell, ME; Seifert, JA; Feser, ML; Demoruelle, MK; Sakatos, A; Anantharaman, K; Deane, KD; Kuhn, KA; Holers, VM; Duerkop, BA	Individuals at risk for rheumatoid arthritis harbor differential intestinal bacteriophage communities with distinct metabolic potential	CELL HOST & MICROBE	Article	University of Colorado System; University of Colorado Anschutz Medical Campus; University of Wisconsin System; University of Wisconsin Madison; University of Colorado System; University of Colorado Anschutz Medical Campus	2021	10.1016/j.chom.2021.03.020	Rheumatoid arthritis (RA) is an autoimmune disease characterized in seropositive individuals by the presence of anti-cyclic citrullinated protein (CCP) antibodies. RA is linked to the intestinal microbiota, yet the association of microbes with CCP serology and their contribution to RA is unclear. Wedescribe intestinal phage communities of individuals at risk for developing RA, with or without ant…
185	Fan, ZX; Ross, RP; Stanton, C; Hou, B; Zhao, JX; Zhang, H; Yang, B; Chen, W	Lactobacillus casei CCFM1074 Alleviates Collagen-Induced Arthritis in Rats via Balancing Treg/Th17 and Modulating the Metabolites and Gut Microbiota	FRONTIERS IN IMMUNOLOGY	Article	Jiangnan University; Jiangnan University; Jiangnan University; University College Cork; Teagasc; Jiangnan University; Jiangnan University	2021	10.3389/fimmu.2021.680073	Gut microbiota and their influence on metabolites are receiving increasing attentions in autoimmune diseases including rheumatoid arthritis (RA). Probiotics become a promising manipulator to prevent or attenuate the progression of arthritis, some evidences suggesting that lactobacilli treatment influence the responses to RA therapy but the underlying mechanisms are limited. By using a collagen-in…
186	Alghamdi, MA; Redwan, EM	Interplay of Microbiota and Citrullination in the Immunopathogenesis of Rheumatoid Arthritis	PROBIOTICS AND ANTIMICROBIAL PROTEINS	Article	King Abdulaziz University; King Abdulaziz University; Egyptian Knowledge Bank (EKB); City of Scientific Research & Technological Applications (SRTA-City)	2022	10.1007/s12602-021-09802-7	Microbiota is a balanced ecosystem that has important functions to the host health including development, defense, digestion, and absorption of dietary fibers and minerals, vitamin synthesizes, protection, and training the host immune system. On the other hand, its dysbiosis is linked to many human diseases such as rheumatoid arthritis (RA). The RA is an inflammatory autoimmune disorder caused by…
187	Tan, WX; Qiu, Y; Chen, N; Gao, J; Liang, JJ; Liu, Y; Zhao, DB	The intervention of intestinal Wnt/beta-catenin pathway alters inflammation and disease severity of CIA	IMMUNOLOGIC RESEARCH	Article	Naval Medical University; Shandong First Medical University & Shandong Academy of Medical Sciences; Nanjing University	2021	10.1007/s12026-021-09190-8	Autoreactive T cell is one of the leading causes of immunological tolerance defects in the chronic inflammatory lesions of rheumatoid arthritis (RA). There have been several extracellular signals and intracellular pathways reported in regulating this process but largely remain unknown yet. In this study, we explored the roles of intestinal Wnt/beta-catenin on disease severity during collagen-indu…
188	Cannarella, LAT; Mari, NL; Alcantara, CC; Iryioda, TMV; Costa, NT; Oliveira, SR; Lozovoy, MAB; Reiche, EMV; Dichi, I; Simao, ANC	Mixture of probiotics reduces inflammatory biomarkers and improves the oxidative/nitrosative profile in people with rheumatoid arthritis	NUTRITION	Article	Universidade Estadual de Londrina; Universidade Estadual de Londrina; Universidade Estadual de Londrina	2021	10.1016/j.nut.2021.111282	Objectives: Studies have demonstrated that the gut microbiota of people with rheumatoid arthritis (RA) is different from that of healthy individuals and could influence inflammation and oxidative stress. In this study, we sought to evaluate the effects of supplementation with a mixture of probiotics on cytokine plasma levels, inflammatory biomarkers, oxidative/nitrosative stress profile, and Dise…
189	Rooney, CM; Mankia, K; Mitra, S; Moura, IB; Emery, P; Wilcox, MH	Perturbations of the gut microbiome in anti-CCP positive individuals at risk of developing rheumatoid arthritis	RHEUMATOLOGY	Article	Leeds General Infirmary; University of Leeds; Chapel Allerton Hospital; Chapel Allerton Hospital; Leeds Biomedical Research Centre	2021	10.1093/rheumatology/keaa792	Objective: Individuals with newly diagnosed RA have a distinct microbiome when compared with healthy controls. However, little is known as to when these microbiome perturbations begin. Using a prospective at-risk cohort of individuals positive for anti-citrullinated protein (anti-CCP) antibody with new onset musculoskeletal symptoms, but without clinical arthritis, we investigated for the presenc…
190	Leceta, J; Garin, MI; Conde, C	Mechanism of Immunoregulatory Properties of Vasoactive Intestinal Peptide in the K/BxN Mice Model of Autoimmune Arthritis	FRONTIERS IN IMMUNOLOGY	Article	Complutense University of Madrid; Centro de Investigaciones Energeticas, Medioambientales Tecnologicas; CIBER - Centro de Investigacion Biomedica en Red; CIBERER; Fundacion Jimenez Diaz; Complexo Hospitalario Universitario de Santiago de Compostela	2021	10.3389/fimmu.2021.701862	The K/BxN mouse model of rheumatoid arthritis (RA) closely resembles the human disease. In this model, arthritis results from activation of autoreactive KRN T cells recognizing the glycolytic enzyme glucose-6-phosphate isomerase (GPI) autoantigen, which provides help to GPI-specific B cells, resulting in the production of pathogenic anti-GPI antibodies that ultimately leads to arthritis symptoms …
191	Horta-Baas, G; Sandoval-Cabrera, A; Romero-Figueroa, MD	Modification of Gut Microbiota in Inflammatory Arthritis: Highlights and Future Challenges	CURRENT RHEUMATOLOGY REPORTS	Article	Instituto Mexicano del Seguro Social	2021	10.1007/s11926-021-01031-9	Purpose of Review This Review evaluates the available information on the modification of the microbiota by diet, prebiotics, probiotics, or drugs and its association with the severity of arthritis in animals and humans and highlights how this modulation could have therapeutic applications in RA. Recent Findings The gut microbiota and microbiota-derived metabolites play a role in developing rheuma…
192	Fan, ZX; Yang, B; Ross, RP; Stanton, C; Zhang, F; Sun, J; Zhao, JX; Zhang, H; Chen, W	Propionate restores disturbed gut microbiota induced by methotrexate in Rheumatoid Arthritis: From clinic to experiments	JOURNAL OF KING SAUD UNIVERSITY SCIENCE	Article	Jiangnan University; Jiangnan University; Jiangnan University; University College Cork; Teagasc; Jiangnan University; Jiangnan University	2021	10.1016/j.jksus.2021.101545	Objective: Gut toxicity of methotrexate restricts its long-term clinical application in patients with rheumatoid arthritis (RA). However, the disturbed gut microbiota especially beneficial bacteria induced by methotrexate remain unclear, and the way to alleviate the disturbances is limited. The aim of present study was to elucidate the effects of methotrexate on gut microbiota in RA patients and …
193	Wang, Z; Yu, Y; Liao, JY; Hu, W; Bian, XQ; Wu, JL; Zhu, YZ	S-Propargyl-Cysteine Remodels the Gut Microbiota to Alleviate Rheumatoid Arthritis by Regulating Bile Acid Metabolism	FRONTIERS IN CELLULAR AND INFECTION MICROBIOLOGY	Article	Macau University of Science & Technology; Macau University of Science & Technology; Fudan University; Fudan University	2021	10.3389/fcimb.2021.670593	Background: Rheumatoid arthritis (RA) is a long-term autoimmune disorder characterized by chronic inflammation that results in swollen and painful joints and even cartilage and bone damage. The gut microbiota, a novel anti-inflammatory target, is considered an important environmental factor in the development of RA. S-propargylcysteine (SPRC), an amino acid analogue, exerts anti-inflammatory, car…
194	Pang, J; Ma, SP; Xu, XY; Zhang, BX; Cai, Q	Effects of rhizome of Atractylodes koreana (Nakai) Kitam on intestinal flora and metabolites in rats with rheumatoid arthritis	JOURNAL OF ETHNOPHARMACOLOGY	Article	Liaoning University of Traditional Chinese Medicine	2021	10.1016/j.jep.2021.114026	Ethnopharmacological relevance: Atractylodis rhizoma in Chinese Pharmacopoeia are Atractylodes lancea (Thunb.) DC and Atractylodes chinensis (DC.) Koidz. Atractylodes koreana (Nakai) Kitam has not been included in Chinese Pharmacopoeia, however, in the 'dictionary of traditional Chinese medicine', Atractylodes koreana (Nakai) Kitam is often used as Atractylodis rhizoma in the north of China. Acco…
195	Gupta, VK; Cunningham, KY; Hur, B; Bakshi, U; Huang, HR; Warrington, KJ; Taneja, V; Myasoedova, E; Davis, JM; Sung, JY	Gut microbial determinants of clinically important improvement in patients with rheumatoid arthritis	GENOME MEDICINE	Article	Mayo Clinic; Mayo Clinic; University of Minnesota System; University of Minnesota Twin Cities; Mayo Clinic; Mayo Clinic; Mayo Clinic; Mayo Clinic	2021	10.1186/s13073-021-00957-0	Background Rapid advances in the past decade have shown that dysbiosis of the gut microbiome is a key hallmark of rheumatoid arthritis (RA). Yet, the relationship between the gut microbiome and clinical improvement in RA disease activity remains unclear. In this study, we explored the gut microbiome of patients with RA to identify features that are associated with, as well as predictive of, minim…
196	Wolter, M; Grant, ET; Boudaud, M; Steimle, A; Pereira, GV; Martens, EC; Desai, MS	Leveraging diet to engineer the gut microbiome	NATURE REVIEWS GASTROENTEROLOGY & HEPATOLOGY	Article	Luxembourg Institute of Health; University of Luxembourg; University of Michigan System; University of Michigan; University of Southern Denmark; Odense University Hospital	2021	10.1038/s41575-021-00512-7	Autoimmune diseases, including inflammatory bowel disease, multiple sclerosis and rheumatoid arthritis, have distinct clinical presentations but share underlying patterns of gut microbiome perturbation and intestinal barrier dysfunction. Their potentially common microbial drivers advocate for treatment strategies aimed at restoring appropriate microbiome function, but individual variation in host…
197	Lin, SH; Chang, YS; Lin, TM; Hu, LF; Hou, TY; Hsu, HC; Shen, YC; Kuo, PI; Chen, WS; Lin, YC; Chen, JH; Chang, CC	Proton Pump Inhibitors Increase the Risk of Autoimmune Diseases: A Nationwide Cohort Study	FRONTIERS IN IMMUNOLOGY	Article	Taipei Medical University; Shuang Ho Hospital; Taipei Medical University; Taipei Medical University; Taipei Medical University Hospital; Taipei Medical University; Taipei Municipal WanFang Hospital; National Yang Ming Chiao Tung University; Taipei Veterans General Hospital; Taipei Medical University; Taipei Medical University	2021	10.3389/fimmu.2021.736036	Background Previous study revealed proton pump inhibitors (PPIs) have an effect on gut microbiota. Alteration of the microbiome causes changes of the host immune system and then induces the development of autoimmune diseases (ADs). This study aimed to explore the possible association between PPIs use and ADs. Methods This study was conducted using data from the Taiwan National Health Insurance Re…
198	Mei, LY; Yang, ZH; Zhang, XL; Liu, ZH; Wang, MJ; Wu, XD; Chen, XM; Huang, QC; Huang, RY	Sustained Drug Treatment Alters the Gut Microbiota in Rheumatoid Arthritis	FRONTIERS IN IMMUNOLOGY	Article	Guangzhou University of Chinese Medicine; Utrecht University; Utrecht University Medical Center; Guangzhou University of Chinese Medicine; Guangzhou University of Chinese Medicine; Guangzhou University of Chinese Medicine	2021	10.3389/fimmu.2021.704089	Several studies have investigated the causative role of the microbiome in the development of rheumatoid arthritis (RA), but changes in the gut microbiome in RA patients during drug treatment have been less well studied. Here, we tracked the longitudinal changes in gut bacteria in 22 RA patients who were randomized into two groups and treated with Huayu-Qiangshen-Tongbi formula (HQT) plus methotre…
199	Chen, YM; Ma, CY; Liu, LX; He, JQ; Zhu, CX; Zheng, FP; Dai, WE; Hong, XP; Liu, DZ; Tang, D; Dai, Y	Analysis of gut microbiota and metabolites in patients with rheumatoid arthritis and identification of potential biomarkers	AGING-US	Article	Jinan University; Southern University of Science & Technology; Jinan University; Southern University of Science & Technology; University of Texas System; University of Texas Austin	2021		Rheumatoid arthritis (RA) is an autoimmune disease described by joint destruction, synovitis and pannus formation. The gut microbiota acts as an environmental factor that plays an important role in RA, but little research regarding the etiopathogenic mechanisms of the microbiome in RA has been carried out. We used an integrated approach of 16S rRNA gene sequencing and ultrahigh-performance liquid…
200	Jeong, Y; Jhun, J; Lee, SY; Na, HS; Choi, J; Cho, KH; Lee, SY; Lee, AR; Park, SJ; You, HJ; Kim, JW; Park, MS; Kwon, B; Cho, ML; Ji, GE; Park, SH	Therapeutic Potential of a Novel Bifidobacterium Identified Through Microbiome Profiling of RA Patients With Different RF Levels	FRONTIERS IN IMMUNOLOGY	Article	Seoul National University (SNU); BIFIDO Co. Ltd.; Catholic University of Korea; Catholic University of Korea; Catholic University of Korea; Seoul National University (SNU); Seoul National University (SNU); Catholic University of Daegu; Catholic University of Korea; Catholic University of Korea; Seoul St. Mary's Hospital	2021	10.3389/fimmu.2021.736196	The potential therapeutic effects of probiotic bacteria in rheumatoid arthritis (RA) remain controversial. Thus, this study aimed to discover potential therapeutic bacteria based on the relationship between the gut microbiome and rheumatoid factor (RF) in RA. Bacterial genomic DNA was extracted from the fecal samples of 93 RA patients and 16 healthy subjects. Microbiota profiling was conducted th…
201	Tomofuji, Y; Kishikawa, T; Maeda, Y; Ogawa, K; Nii, T; Okuno, T; Oguro-Igashira, E; Kinoshita, M; Yamamoto, K; Sonehara, K; Yagita, M; Hosokawa, A; Motooka, D; Matsumoto, Y; Matsuoka, H; Yoshimura, M; Ohshima, S; Nakamura, S; Inohara, H; Mochizuki, H; Takeda, K; Kumanogoh, A; Okada, Y	Whole gut virome analysis of 476 Japanese revealed a link between phage and autoimmune disease	ANNALS OF THE RHEUMATIC DISEASES	Article	Osaka University; Osaka University; Aichi Cancer Center; Osaka University; Osaka University; Osaka University; Osaka University; Osaka University; Osaka University; Osaka University; Osaka University; Osaka University; RIKEN	2022	10.1136/annrheumdis-2021-221267	Objective The relationship between autoimmune diseases and the gut microbiome has been intensively studied, and several autoimmunity-associated bacterial taxa have been identified. However, much less is known about the roles of the gut virome in autoimmune diseases. Methods Here, we performed a whole gut virome analysis based on the shotgun sequencing of 476 Japanese which included patients with …
202	Onyango, SO; Juma, J; De Paepe, K; van de Wiele, T	Oral and Gut Microbial Carbohydrate-Active Enzymes Landscape in Health and Disease	FRONTIERS IN MICROBIOLOGY	Article	Ghent University; CGIAR; International Livestock Research Institute (ILRI)	2021	10.3389/fmicb.2021.653448	Inter-individual variability in the microbial gene complement encoding for carbohydrate-active enzymes (CAZymes) can profoundly regulate how the host interacts with diverse carbohydrate sources thereby influencing host health. CAZy-typing, characterizing the microbiota-associated CAZyme-coding genes within a host individual, can be a useful tool to predict carbohydrate pools that the host can met…
203	Li, N; Li, XF; Su, R; Wu, RH; Niu, HQ; Luo, J; Gao, C; Li, XF; Wang, CH	Low-Dose Interleukin-2 Altered Gut Microbiota and Ameliorated Collagen-Induced Arthritis	JOURNAL OF INFLAMMATION RESEARCH	Article	Shanxi Medical University; Harvard University; Boston Children's Hospital; Brigham & Women's Hospital; Harvard Medical School	2022	10.2147/JIR.S344393	Purpose: Low-dose interleukin-2 (ld-IL-2) has been shown to regulate the balance between effector T and regulatory T (Treg) cells and has been used in several clinical trials to treat autoimmune diseases including rheumatoid arthritis (RA). In this study, we investigated the effects of ld-IL-2 on collagen-induced arthritis (CIA) in mice. Methods: Arthritis severity in CIA mice was measured using …
204	Edwards, V; Smith, DL; Meylan, F; Tiffany, L; Poncet, S; Wu, WW; Phue, JN; Santana-Quintero, L; Clouse, KA; Gabay, O	Analyzing the Role of Gut Microbiota on the Onset of Autoimmune Diseases Using TNF Delta ARE Murine Model	MICROORGANISMS	Article	US Food & Drug Administration (FDA); National Institutes of Health (NIH) - USA; NIH National Institute of Arthritis & Musculoskeletal & Skin Diseases (NIAMS); US Food & Drug Administration (FDA); US Food & Drug Administration (FDA); US Food & Drug Administration (FDA)	2022	10.3390/microorganisms10010073	Very little is known about disease transmission via the gut microbiome. We hypothesized that certain inflammatory features could be transmitted via the gut microbiome and tested this hypothesis using an animal model of inflammatory diseases. Twelve-week-old healthy C57 Bl/6 and Germ-Free (GF) female and male mice were fecal matter transplanted (FMT) under anaerobic conditions with TNF Delta ARE-/…
205	Berthelot, JM; Bandiaky, ON; Le Goff, B; Amador, G; Chaux, AG; Soueidan, A; Denis, F	Another Look at the Contribution of Oral Microbiota to the Pathogenesis of Rheumatoid Arthritis: A Narrative Review	MICROORGANISMS	Article	Nantes Universite; CHU de Nantes; Nantes Universite; Nantes Universite; Nantes Universite; CHU de Nantes; Nantes Universite; Nantes Universite; CHU de Nantes; CHU Tours	2022	10.3390/microorganisms10010059	Although autoimmunity contributes to rheumatoid arthritis (RA), several lines of evidence challenge the dogma that it is mainly an autoimmune disorder. As RA-associated human leukocyte antigens shape microbiomes and increase the risk of dysbiosis in mucosae, RA might rather be induced by epigenetic changes in long-lived synovial presenting cells, stressed by excessive translocations into joints o…
206	Sanchez, P; Letarouilly, JG; Nguyen, Y; Sigaux, J; Barnetche, T; Czernichow, S; Flipo, RM; Sellam, J; Daien, C	Efficacy of Probiotics in Rheumatoid Arthritis and Spondyloarthritis: A Systematic Review and Meta-Analysis of Randomized Controlled Trials	NUTRIENTS	Article	Universite de Montpellier; CHU de Montpellier; Universite de Lille - ISITE; CHU Lille; Universite de Lille; Assistance Publique Hopitaux Paris (APHP); Hopital Universitaire Beaujon - APHP; UDICE-French Research Universities; Universite Paris Cite; Assistance Publique Hopitaux Paris (APHP); Hopital Universitaire Avicenne - APHP; Institut National de la Sante et de la Recherche Medicale (Inserm); U…	2022	10.3390/nu14020354	Background: We aimed to provide a systematic review and meta-analysis of randomized controlled trials assessing the effect of probiotics supplementation on symptoms and disease activity in patients with chronic inflammatory rheumatic diseases (rheumatoid arthritis (RA), spondylarthritis (SpA), or psoriatic arthritis). Methods: A systematic literature review and meta-analysis from RA and SpA rando…
207	Rui, Z; Zhang, L; Li, XF; Han, JX; Yuan, YF; Ding, H; Liu, Y; Ding, XL	Pterostilbene exert an anti-arthritic effect by attenuating inflammation, oxidative stress, and alteration of gut microbiota	JOURNAL OF FOOD BIOCHEMISTRY	Article	Shandong First Medical University & Shandong Academy of Medical Sciences; Shandong First Medical University & Shandong Academy of Medical Sciences	2022	10.1111/jfbc.14011	Pterostilbene is a revesterol analog with a long bioavailability and having potent anti-inflammatory activity in animal studies. In this study, we tried to scrutinize the anti-arthritic effect of pterostilbene against complete Freund's adjuvant (CFA)-induced arthritis model in rats. CFA was used for induction of the RA, and rats were divided into groups depending on different doses of pterostilbe…
208	Xu, Q; Ni, JJ; Han, BX; Yan, SS; Wei, XT; Feng, GJ; Zhang, H; Zhang, L; Li, B; Pei, YF	Causal Relationship Between Gut Microbiota and Autoimmune Diseases: A Two-Sample Mendelian Randomization Study	FRONTIERS IN IMMUNOLOGY	Article	Soochow University - China; Soochow University - China; Soochow University - China; Nantong University; Soochow University - China	2022	10.3389/fimmu.2021.746998	BackgroundGrowing evidence has shown that alterations in gut microbiota composition are associated with multiple autoimmune diseases (ADs). However, it is unclear whether these associations reflect a causal relationship. ObjectiveTo reveal the causal association between gut microbiota and AD, we conducted a two-sample Mendelian randomization (MR) analysis. Materials and MethodsWe assessed genome-…
209	Yu, D; Du, JP; Pu, X; Zheng, LY; Chen, SS; Wang, N; Li, J; Chen, SY; Pan, SB; Shen, B	The Gut Microbiome and Metabolites Are Altered and Interrelated in Patients With Rheumatoid Arthritis	FRONTIERS IN CELLULAR AND INFECTION MICROBIOLOGY	Article	Wenzhou Medical University; Wenzhou Medical University	2022	10.3389/fcimb.2021.763507	The relationship among the gut microbiome, global fecal metabolites and rheumatoid arthritis (RA) has not been systematically evaluated. In this study, we performed 16S rDNA sequencing and liquid chromatography-tandem mass spectrometry (LC-MS/MS)-based nontargeted metabolomic profiling on feces of 26 untreated RA patients and 26 healthy controls. Twenty-six genera and forty-one MS2-identified met…
210	Shi, W; Ye, H; Deng, YJ; Chen, SL; Xiao, W; Wang, ZZ; Xiong, ZL; Zhao, LS	Yaobitong capsules reshape and rebalance the gut microbiota and metabolites of arthritic rats: An integrated study of microbiome and fecal metabolomics analysis	JOURNAL OF CHROMATOGRAPHY B-ANALYTICAL TECHNOLOGIES IN THE BIOMEDICAL AND LIFE SCIENCES	Article	Shenyang Pharmaceutical University	2022	10.1016/j.jchromb.2021.123096	Yaobitong capsule (YBTC), a Chinese medicine compound preparation, has been demonstrated to affect multiple pathways associated with inflammation and exhibit potential anti-arthritis effect. In this study, an integrated omic approach based on UHPLC-Q-TOF MS and 16S rRNA sequencing analyses was proposed to reveal the antiarthritis effect and possible mechanism of YBTC. The AIA rat model showed tha…
211	Li, ZD; Qi, FY; Li, F	Integrating 16S sequencing and metabolomics study on anti-rheumatic mechanisms against collagen-induced arthritis of Wantong Jingu Tablet	CHINESE JOURNAL OF NATURAL MEDICINES	Article	Jilin University; Ministry of Education, China; Jilin University; Ministry of Education, China; Jilin University; Jilin University	2022	10.1016/S1875-5364(21)60080-8	Wantong Jingu Tablet (WJT), a mixture of traditional Chinese medicine, was reported to relieve the symptoms of rheumatoid arthritis (RA), but its pharmacological mechanism was not completely understood. The aim of this study was to investigate the therapeutic mechanisms of WJT for RA in vivo. The effects of WJT on joint pathology, as well as the levels of Bax, Bcl-2, caspase3, cleaved-caspase-3, …
212	He, J; Chu, YA; Li, J; Meng, QR; Liu, YD; Jin, JY; Wang, YF; Wang, J; Huang, B; Shi, LJ; Shi, X; Tian, JY; Zhufeng, YZ; Feng, RL; Xiao, WJ; Gan, YZ; Guo, JP; Shao, CJ; Su, Y; Hu, FL; Sun, XL; Yu, J; Kang, Y; Li, ZG	Intestinal butyrate-metabolizing species contribute to autoantibody production and bone erosion in rheumatoid arthritis	SCIENCE ADVANCES	Article	Peking University; Chinese Academy of Sciences; Beijing Institute of Genomics, CAS; Southern University of Science & Technology; Peking University; Jinan University; Southern University of Science & Technology; Chinese Academy of Sciences; University of Chinese Academy of Sciences, CAS	2022	10.1126/sciadv.abm1511	The imbalance between pathogenic and beneficial species of the intestinal microbiome and metabolism in rheumatoid arthritis (RA) remains unclarified. Here, using shotgun-based metagenome sequencing for a treatment-naive patient cohort and a quasi-paired cohort method, we observed a deficiency of butyrate-producing species and an overwhelming number of butyrate consumers in RA patients. These outc…
213	Wang, Q; Zhang, SX; Chang, MJ; Qiao, J; Wang, CH; Li, XF; Yu, Q; He, PF	Characteristics of the Gut Microbiome and Its Relationship With Peripheral CD4(+) T Cell Subpopulations and Cytokines in Rheumatoid Arthritis	FRONTIERS IN MICROBIOLOGY	Article	Shanxi Medical University; Shanxi Medical University; Shanxi Medical University; Shanxi Medical University	2022	10.3389/fmicb.2022.799602	This study investigated the association between intestinal microbiota abundance and diversity and cluster of differentiation (CD)4(+) T cell subpopulations, cytokine levels, and disease activity in rheumatoid arthritis RA. A total of 108 rheumatoid arthritis (RA) patients and 99 healthy control (HC) subjects were recruited. PICRUSt2 was used for functional metagenomic predictions. Absolute counts…
214	Li, ZX; Nie, LJ; Li, Y; Yang, L; Jin, LL; Du, BZ; Yang, J; Zhang, XL; Cui, HT; Luobu, O	Traditional Tibetan Medicine Twenty-Five Wei'er Tea Pills Ameliorate Rheumatoid Arthritis Based on Chemical Crosstalk Between Gut Microbiota and the Host	FRONTIERS IN PHARMACOLOGY	Article	Tibet University; Tibet University; Tibet University; Tianjin University of Traditional Chinese Medicine; University of South China; Shandong University; Tibet University; Tibet University	2022	10.3389/fphar.2022.828920	Twenty-Five Wei'er Tea Pills (TFP), a traditional Tibetan medicine, has shown to have a promising therapeutic effect in patients with Rheumatoid arthritis (RA), as well as being safe. Nonetheless, there have been limited pharmacological studies that have explored this therapeutic option. As gut microbiota has been proven to have a critical role in the pathogenesis of RA, this study aims to explor…
215	Kitamura, K; Shionoya, H; Suzuki, S; Fukai, R; Uda, S; Abe, C; Takemori, H; Nishimura, K; Baba, H; Katayama, K; Terato, K; Waritani, T	Oral and Intestinal Bacterial Substances Associated with Disease Activities in Patients with Rheumatoid Arthritis: A Cross-Sectional Clinical Study	JOURNAL OF IMMUNOLOGY RESEARCH	Article	Teikyo University	2022	10.1155/2022/6839356	Intestinal bacterial compositions of rheumatoid arthritis (RA) patients have been reported to be different from those of healthy people. Dysbiosis, imbalance of the microbiota, is widely known to cause gut barrier damage, resulting in an influx of bacteria and their substances into host bloodstreams in animal studies. However, few studies have investigated the effect of bacterial substances on th…
216	Asoudeh, F; Djafarian, K; Akhalghi, M; Mahmoudi, M; Jamshidi, AR; Farhadi, E; Esmaillzadeh, A	The effect of probiotic cheese consumption on inflammatory and anti-inflammatory markers, disease severity, and symptoms in patients with rheumatoid arthritis: study protocol for a randomized, double-blind, placebo-controlled trial	TRIALS	Article	Tehran University of Medical Sciences; Tehran University of Medical Sciences; Tehran University of Medical Sciences; Tehran University of Medical Sciences; Isfahan University Medical Science	2022	10.1186/s13063-022-06113-2	Background: In recent decades, several studies have shown changes in the intestinal microflora among patients with rheumatoid arthritis (RA). Therapeutic measures using probiotics have shown favorable effects on the recovery of these patients. However, most studies have used probiotic supplements. In this study, we aimed to investigate the effect of probiotic cheese consumption on inflammatory an…
217	Wang, N; Yang, LJ; Shang, LL; Liang, ZJ; Wang, YL; Feng, M; Yu, ST; Li, XY; Gao, C; Li, ZY; Luo, J	Altered Fecal Metabolomics and Potential Biomarkers of Psoriatic Arthritis Differing From Rheumatoid Arthritis	FRONTIERS IN IMMUNOLOGY	Article	Shanxi Medical University; Shanxi University; Harvard University; Brigham & Women's Hospital; Harvard Medical School	2022	10.3389/fimmu.2022.812996	Psoriatic arthritis (PsA) is a chronic inflammatory joint disease, and the diagnosis is quite difficult due to the unavailability of reliable clinical markers. This study aimed to investigate the fecal metabolites in PsA by comparison with rheumatoid arthritis (RA), and to identify potential diagnostic biomarkers for PsA. The metabolic profiles of the fecal samples from 27 PsA and 29 RA patients …
218	Wei, M; Chu, CQ	Prediction of treatment response: Personalized medicine in the management of rheumatoid arthritis	BEST PRACTICE & RESEARCH IN CLINICAL RHEUMATOLOGY	Article	Oregon Health & Science University; US Department of Veterans Affairs; Veterans Health Administration (VHA); VA Portland Health Care System	2022	10.1016/j.berh.2021.101741	Highly efficacious drugs are widely available for treating rheu-matoid arthritis (RA). However, accurately selecting a likely effec-tive drug for individual RA patients has been challenging. Biomarkers are required since clinical phenotypes are not reliable to guide the choice of drugs.Previously identified genetic variants for predicting treatment response have failed in replication in independe…
219	Sun, XY; Wang, YS; Le, XK; Wang, ML; Dong, JY; Tang, W; Lee, ZJ; Guo, YL; Li, M; Li, YY	Alterations of gut fungal microbiota in patients with rheumatoid arthritis	PEERJ	Article	Dalian Medical University; Dalian Medical University; Dalian Medical University; Dalian Medical University	2022	10.7717/peerj.13037	Background: Rheumatoid arthritis (RA) is a systemic autoimmune disease, in addition, gut microbiota plays an important role in the etiology of RA. However, our understanding of alterations to the gut fungal microbiota in Chinese population with RA is still limited. Methods: Serum samples were obtained from 62 patients with RA, and 39 age- and gender-matched healthy controls (HCs). Fecal samples w…
220	Yamamoto, Y; Kanayama, N; Nakayama, Y; Matsushima, N	Current Status, Issues and Future Prospects of Personalized Medicine for Each Disease	JOURNAL OF PERSONALIZED MEDICINE	Article	Pfizer; Kyorin Pharmaceutical Co Ltd; Eisai Co Ltd; Johnson & Johnson; Janssen Pharmaceuticals	2022	10.3390/jpm12030444	In recent years, with the advancement of next-generation sequencing (NGS) technology, gene panel tests have been approved in the field of cancer diseases, and approaches to prescribe optimal molecular target drugs to patients are being developed. In the field of rare diseases, whole-genome and whole-exome analysis has been used to identify the causative genes of undiagnosed diseases and to diagno…
221	Lin, XY; Wang, Q; He, ZX; Huang, L; Wen, CP; Zhou, DH	Evaluating the Similarity of Different Collagen-Induced Arthritis Models to the Pre-Clinical Phase of RA in Female Rats	INFLAMMATION	Article	Zhejiang Chinese Medical University; Zhejiang Chinese Medical University	2022	10.1007/s10753-022-01641-0	Since the development of RA is a multistep process, it is critical to take action to prevent RA in the pre-clinical phase. Animal models are currently one of the important methods to study RA, but there are very few animal models for studying the pre- clinical phase of RA (Pre-RA). This study aimed to evaluate the similarity of different collagen-induced arthritis models to Pre-RA in rats. Three …
222	Nguyen, NT; Sun, WH; Chen, TH; Tsai, PC; Chen, CC; Huang, SL	Gut Mucosal Microbiome Is Perturbed in Rheumatoid Arthritis Mice and Partly Restored after TDAG8 Deficiency or Suppression by Salicylanilide Derivative	INTERNATIONAL JOURNAL OF MOLECULAR SCIENCES	Article	Ton Duc Thang University; National Yang Ming Chiao Tung University; National Yang Ming Chiao Tung University; National Yang Ming Chiao Tung University	2022	10.3390/ijms23073527	Rheumatoid arthritis (RA), an autoimmune disease, is characterized by chronic joint inflammation and pain. We previously found that the deletion of T-cell death-associated gene 8 (TDAG8) significantly reduces disease severity and pain in RA mice. Whether it is by modulating gut microbiota remains unclear. In this study, 64 intestinal samples of feces, cecal content, and cecal mucus from the compl…
223	Han, MZ; Zhang, N; Mao, YJ; Huang, BB; Ren, MF; Peng, ZJ; Bai, ZP; Chen, L; Liu, Y; Wang, SS; Huang, SH; Cheng, ZX	The Potential of Gut Microbiota Metabolic Capability to Detect Drug Response in Rheumatoid Arthritis Patients	FRONTIERS IN MICROBIOLOGY	Article	Anhui Medical University; Anhui Medical University; Anhui Medical University; Anhui Medical University	2022	10.3389/fmicb.2022.839015	Gut microbiota plays an essential role in the development of rheumatoid arthritis (RA) and affects drug responses. However, the underlying mechanism remains elusive and urgent to elucidate to explore the pathology and clinical treatment of RA. Therefore, we selected methotrexate (MTX) as an example of RA drugs to explore the interactions between the gut microbiota and drug responses and obtain an…
224	Jiang, SQ; Pan, T; Yu, JL; Zhang, Y; Wang, T; Li, P; Li, F	Thermal and wine processing enhanced Clematidis Radix et Rhizoma ameliorate collagen II induced rheumatoid arthritis in rats	JOURNAL OF ETHNOPHARMACOLOGY	Article	China Pharmaceutical University; China Pharmaceutical University; Xinjiang Medical University; Yunnan University of Chinese Medicine; Yunnan University of Chinese Medicine	2022	10.1016/j.jep.2022.114993	Ethnopharmacological relevance: Clematidis Radix et Rhizoma, a kind of traditional Chinese medicine, is derived from Clematis chinensis Osbeck, Clematis hexapetala Pall. and Clematis manshurica Rupr. This herb shows great effects on expelling wind and dispelling dampness in ancient and it has anti-inflammatory and analgesic activity in modern clinical application. Aim of the study: This experimen…
225	Wu, SS; Xu, XX; Shi, YY; Chen, Y; Li, YQ; Jiang, SQ; Wang, T; Li, P; Li, F	System pharmacology analysis to decipher the effect and mechanism of active ingredients combination from herb couple on rheumatoid arthritis in rats	JOURNAL OF ETHNOPHARMACOLOGY	Article	China Pharmaceutical University; Xinjiang Medical University; Yunnan University of Chinese Medicine; Yunnan University of Chinese Medicine	2022	10.1016/j.jep.2022.114969	Ethnopharmacological relevance: Traditional herb couple Angelicae pubescentis radix (APR) and Notopterygii rhizoma et radix (NRR), composition of two traditional Chinese medicinal herbs, has been used clinically in China for the treatment of rheumatoid arthritis (RA) over years. APR and NRR contain coumarins and phenolic acids, which have been reported to have analgesic and anti-inflammatory acti…
226	Zhang, Z; Wan, HT; Han, JJ; Sun, XL; Yu, RX; Liu, B; Lu, CY; Zhou, J; Su, XR	Ameliorative effect of tuna elastin peptides on AIA mice by regulating the composition of intestinal microorganisms and SCFAs	JOURNAL OF FUNCTIONAL FOODS	Article	Ningbo University	2022	10.1016/j.jff.2022.105076	Elastin peptides display a wide range of biological activities. This study aimed to investigate the ameliorative effect of tuna elastin peptides on adjuvant-induced arthritis (AIA). The daily administration of tuna elastin peptides markedly downregulated the levels of proinflammatory cytokines and upregulated the immunosuppressive cytokines in the serum, bone, and colon of the AIA model. 16S rRNA…
227	Yao, Y; Cai, XY; Zheng, YQ; Zhang, M; Fei, WD; Sun, DL; Zhao, MD; Ye, YQ; Zheng, CH	Short-chain fatty acids regulate B cells differentiation via the FFA2 receptor to alleviate rheumatoid arthritis	BRITISH JOURNAL OF PHARMACOLOGY	Article	Zhejiang University; Zhejiang University	2022	10.1111/bph.15852	Background and Purpose Short-chain fatty acids (SCFAs) are metabolites from gut microbes involved in the host's inflammatory response and immunity. The aim of this study was to investigate the role of SCFAs in rheumatoid arthritis (RA) and possible mechanisms. Experimental Approach Gut microbiota diversity in mice was analysed by 16S rDNA sequencing. SCFAs levels were analysed by gas chromatograp…
228	Cheng, XX; Pi, ZF; Zheng, Z; Liu, S; Song, FR; Liu, ZQ	Combined 16S rRNA gene sequencing and metabolomics to investigate the protective effects of Wu-tou decoction on rheumatoid arthritis in rats	JOURNAL OF CHROMATOGRAPHY B-ANALYTICAL TECHNOLOGIES IN THE BIOMEDICAL AND LIFE SCIENCES	Article		2022	10.1016/j.jchromb.2022.123249	Wu-tou decoction (WTD) is a traditional Chinese medicine (TCM) formula which has been used for treating rheumatoid arthritis (RA) for a thousand years. However, the underlying mechanism of WTD in treating RA is still unclear. In recent years, more and more attention has been paid to the role of gut microbiota and microbiotaderived metabolites in the treatment of RA. Hence, this study aims to inve…
229	de Arruda, AA; Correa, JD; Singh, Y; Oliveira, SR; Machado, CC; Schneider, AH; Medeiros, JD; Fernandes, GR; Macari, S; Barrioni, BR; Santos, MD; Duffles, LF; Nakaya, HTI; Fukada, SY; Graves, DT; Cunha, FQ; Silva, TA	Methotrexate promotes recovery of arthritis-induced alveolar bone loss and modifies the composition of the oral-gut microbiota	ANAEROBE	Article	Universidade Federal de Minas Gerais; Pontificia Universidade Catolica de Minas Gerais; Universidade de Sao Paulo; Universidade de Sao Paulo; Universidade do Estado de Mato Grosso; Fundacao Oswaldo Cruz; Universidade Federal de Minas Gerais; Universidade Federal de Minas Gerais; Universidade de Sao Paulo; University of Pennsylvania; Universidade Federal de Minas Gerais; Universidade de Sao Paulo	2022	10.1016/j.anaerobe.2022.102577	Objectives: The impact of rheumatoid arthritis (RA) on the shaping of the oral and gut microbiome raises the question of whether and how RA treatment modifies microbial communities. We examined changes in the oral and gut microbiota in a mouse model of antigen-induced arthritis (AIA) treated or not with methotrexate (MTX). Methods: Maxillae and stools were evaluated by the MiSeq platform of the V…
230	Hu, Q; Wu, CY; Yu, JT; Luo, JM; Peng, XC	Angelica sinensis polysaccharide improves rheumatoid arthritis by modifying the expression of intestinal Cldn5, Slit3 and Rgs18 through gut microbiota	INTERNATIONAL JOURNAL OF BIOLOGICAL MACROMOLECULES	Article	Jinan University	2022	10.1016/j.ijbiomac.2022.03.090	Rheumatoid arthritis (RA) is an autoimmune disease with a high incidence. Recent studies have demonstrated that diet can contribute to the development and progression of RA. Indeed, non-starch polysaccharides (NSPs) were known to be related to the improvement of RA. In this study, the collagen-induced rats were administrated with Angelica sinensis polysaccharide (ASP) at 200 mg/kg (L), 400 mg/kg …
231	Li, MY; Yang, L; Zhao, LL; Bai, F; Liu, XL	Comparison of Intestinal Microbes in Noninfectious Anterior Scleritis Patients With and Without Rheumatoid Arthritis	FRONTIERS IN MICROBIOLOGY	Article	Jilin University	2022	10.3389/fmicb.2022.925929	We compared intestinal microbes in anterior noninfectious scleritis patients with and without rheumatoid arthritis. Active noninfectious anterior scleritis patients without other immune diseases (G group, 16 patients) or with active rheumatoid arthritis (GY group, seven patients) were included in this study. Eight age- and sex-matched healthy subjects served as controls (N group). DNA was extract…
232	Xi, XY; Ye, QB; Li, XY; Lu, XC; Fan, DP; Xia, Y; Xiao, C	Xiong Fu Powder Regulates the Intestinal Microenvironment to Protect Bones Against Destruction in Collagen-Induced Arthritis Rat Models	FRONTIERS IN CELLULAR AND INFECTION MICROBIOLOGY	Article	Beijing University of Chinese Medicine; Chinese Academy of Medical Sciences - Peking Union Medical College; Institute of Medicinal Plant Development - CAMS; Peking Union Medical College; China-Japan Friendship Hospital; Chinese Academy of Medical Sciences - Peking Union Medical College; Peking Union Medical College; China-Japan Friendship Hospital	2022	10.3389/fcimb.2022.854940	BackgroundChanges in the intestinal microenvironment affected bone destruction in rheumatoid arthritis (RA), and spleen deficiency (SD) was closely related to the intestinal microenvironment. In this study, we aimed to explore the aggravation of SD on collagen-induced arthritis (CIA) and the bone protection of compound Xiong Fu powder (XFP) on CIA with SD (SD-CIA) based on the intestinal microenv…
233	Marazzato, M; Iannuccelli, C; Guzzo, MP; Nencioni, L; Lucchino, B; Radocchia, G; Gioia, C; Bonfiglio, G; Neroni, B; Guerrieri, F; Pantanella, F; Garzoli, S; Vomero, M; Barbati, C; Di Franco, M; Schippa, S	Gut Microbiota Structure and Metabolites, Before and After Treatment in Early Rheumatoid Arthritis Patients: A Pilot Study	FRONTIERS IN MEDICINE	Article	Sapienza University Rome; Sapienza University Rome; Sapienza University Rome; University Hospital Sapienza Rome; Centre National de la Recherche Scientifique (CNRS); CNRS - National Institute for Biology (INSB); Institut National de la Sante et de la Recherche Medicale (Inserm); UNICANCER; Centre Leon Berard; Sapienza University Rome	2022	10.3389/fmed.2022.921675	Rheumatoid Arthritis (RA) is a chronic systemic autoimmune disease. Modifications of gut microbiota seem to be associated with the disease, but the impact of gut microbiota on therapies' outcome remains unclear. A role of T cells in RA pathogenesis has been addressed, particularly on the Th17/Treg cells balance. Our study aimed to evaluate in early RA (ERA) patients compared to a control group, f…
234	Lai, WJ; Wang, CY; Lai, RF; Peng, XC; Luo, JM	Lycium barbarum polysaccharide modulates gut microbiota to alleviate rheumatoid arthritis in a rat model	NPJ SCIENCE OF FOOD	Article	Jinan University; Jinan University; Jinan University	2022	10.1038/s41538-022-00149-z	Rheumatoid arthritis (RA) seriously impairs the quality of life of sufferers. It has been shown that Lycium barbarum polysaccharide (LBP), a natural active indigestible ingredient with medicinal and edible functions, can effectively relieve RA, however, whether this effect is related to gut microbiota is not known. This study aimed to explore the RA alleviating mechanism of LBP mediated by gut mi…
235	Wang, C; Segal, LN; Hu, JY; Zhou, BY; Hayes, RB; Ahn, JY; Li, HL	Microbial risk score for capturing microbial characteristics, integrating multi-omics data, and predicting disease risk	MICROBIOME	Article	New York University; New York University; New York University	2022	10.1186/s40168-022-01310-2	Background: With the rapid accumulation of microbiome-wide association studies, a great amount of microbiome data are available to study the microbiome's role in human disease and advance the microbiome's potential use for disease prediction. However, the unique features of microbiome data hinder its utility for disease prediction. Methods: Motivated from the polygenic risk score framework, we pr…
236	El Menofy, NG; Ramadan, M; Abdelbary, ER; Ibrahim, HG; Azzam, AI; Ghit, MM; Ezz, AS; Gazar, YA; Salah, M	Bacterial Compositional Shifts of Gut Microbiomes in Patients with Rheumatoid Arthritis in Association with Disease Activity	MICROORGANISMS	Article	Egyptian Knowledge Bank (EKB); Al Azhar University; Egyptian Knowledge Bank (EKB); Al Azhar University; Egyptian Knowledge Bank (EKB); Al Azhar University; Egyptian Knowledge Bank (EKB); Port Said University	2022	10.3390/microorganisms10091820	Background: Rheumatoid arthritis (RA) is a chronic inflammatory disabling autoimmune disorder. Little is known regarding the association between the gut microbiome and etiopathogenesis of RA. We aimed to dissect the differences in gut microbiomes associated with RA in comparison to healthy individuals and, in addition, to identify the shifts in the bacterial community in association with disease …
237	Ruiz-Limon, P; Mena-Vazquez, N; Moreno-Indias, I; Manrique-Arija, S; Lisbona-Montanez, JM; Cano-Garcia, L; Tinahones, FJ; Fernandez-Nebro, A	Collinsella is associated with cumulative inflammatory burden in an established rheumatoid arthritis cohort	BIOMEDICINE & PHARMACOTHERAPY	Article	CIBER - Centro de Investigacion Biomedica en Red; CIBEROBN; Instituto de Salud Carlos III; Universidad de Malaga; Universidad de Malaga	2022	10.1016/j.biopha.2022.113518	Objective: To analyze the gut microbiota of patients with rheumatoid arthritis (RA) according to disease activity. Methods: An observational cross-sectional study of 110 patients with RA and 110 age-and sex-matched controls was performed. Patients were classified according to the disease activity (DAS28 >= 3.2 or DAS28 < 3.2). Clinical and epidemiological variables were included. The gut microbio…
238	Xu, H; Pan, LB; Yu, H; Han, P; Fu, J; Zhang, ZW; Hu, JC; Yang, XY; Keranmu, A; Zhang, HJ; Bu, MM; Jiang, JD; Wang, Y	Gut microbiota-derived metabolites in inflammatory diseases based on targeted metabolomics	FRONTIERS IN PHARMACOLOGY	Article	Chinese Academy of Medical Sciences - Peking Union Medical College; Institute of Materia Medica - CAMS; Peking Union Medical College	2022	10.3389/fphar.2022.919181	The gut microbiota plays an important role in inflammatory diseases. Metabolites in the three metabolic pathways of tryptophan (Trp), histidine (His), and phenylalanine (Phe) can affect various inflammatory conditions, such as obesity, diabetes, arthritis, colitis, atherosclerosis, and neuroinflammation. We established an LC-MS/MS method to measure 17 metabolites-Trp, 3-indole-acetic acid (Iaa), …
239	Niu, SJ; Zhu, XY; Zhang, J; Ma, YY; Lang, XY; Luo, LL; Li, WJ; Zhao, YP; Zhang, ZY	Arsenic trioxide modulates the composition and metabolic function of the gut microbiota in a mouse model of rheumatoid arthritis	INTERNATIONAL IMMUNOPHARMACOLOGY	Article	Harbin Medical University	2022	10.1016/j.intimp.2022.109159	The mechanism of rheumatoid arthritis (RA) has been widely investigated, and studies on the use of arsenic trioxide (ATO) in the treatment of RA have been reported in recent years. However, the exact mechanism of action of ATO in RA remains unclear. This study explores alterations in the gut microbiota and metabolism during ATO treatment in a mouse model of RA and provides an integrative analysis…
240	Zhu, J; Wang, TT; Lin, YF; Xiong, MH; Chen, JH; Jian, CC; Zhang, J; Xie, HH; Zeng, FW; Huang, Q; Su, J; Zhao, Y; Li, SL; Zeng, FX	The change of plasma metabolic profile and gut microbiome dysbiosis in patients with rheumatoid arthritis	FRONTIERS IN MICROBIOLOGY	Article	Sichuan University; Sichuan Provincial People's Hospital; University of Electronic Science & Technology of China; Sichuan University; North Sichuan Medical University; Chengdu University of Traditional Chinese Medicine; Sichuan University	2022	10.3389/fmicb.2022.931431	ObjectiveRheumatoid arthritis (RA) is a chronic inflammatory joint disease, which is associated with progressive disability, systemic complications, and early death. But its etiology and pathogenesis are not fully understood. We aimed to investigate the alterations in plasma metabolite profiles, gut bacteria, and fungi and their role of them in the pathogenesis of RA. MethodsMetabolomics profilin…
241	Zhang, YM; Liu, Y; Peng, F; Wei, XR; Hao, HQ; Li, W; Zhao, YQ	Cedrol from ginger alleviates rheumatoid arthritis through dynamic regulation of intestinal microenvironment	FOOD & FUNCTION	Article	Shenyang Pharmaceutical University; Shanxi University of Chinese Medicine; Shanxi University of Chinese Medicine; Yanbian University	2022	10.1039/d2fo01983c	The imbalance of intestinal flora would induce immune inflammation. Cedrol (CE), found from ginger by our group earlier, has been proven to play an excellent role in ameliorating rheumatoid arthritis (RA) via acting on JAK3, MAPK, and NF-kappa B. However, there have been no studies on CE ameliorating RA through the regulation of the micro-environment. In this study, the adjuvant arthritis model (…
242	Huang, Q; Su, J; Zhang, WH; Chang, SJ; Li, SL; Zhou, J; Zhang, J; Li, X; Huang, H; Wang, TT; Jiang, XJ; Wu, JH; Zhu, J; Zeng, FX	Multi-omics analysis of biomarkers and molecular mechanism of rheumatoid arthritis with bone destruction	JOINT BONE SPINE	Article	Sichuan Provincial People's Hospital; Shantou University	2022	10.1016/j.jbspin.2022.105438	Objectives: Our study aimed to elucidate the role of metabolites, bacteria, and fungi in rheumatoid arthritis (RA) patients with bone destruction (BD(+)) and identify some biomarkers to predicate bone progression of RA. Methods: Plasma metabolites of the 127 RA patients and 69 healthy controls were conducted by using nontargeted liquid chromatography-mass spectrometry (LC-MS). The gut bacteria an…
243	Jiang, LJ; Shang, MM; Yu, SN; Liu, YD; Zhang, H; Zhou, YZ; Wang, M; Wang, TT; Li, H; Liu, ZH; Zhang, X	A high-fiber diet synergizes with Prevotella copri and exacerbates rheumatoid arthritis	CELLULAR & MOLECULAR IMMUNOLOGY	Article	Chinese Academy of Medical Sciences - Peking Union Medical College; Peking Union Medical College Hospital; Beijing Hospital; Chinese Academy of Medical Sciences - Peking Union Medical College; Peking Union Medical College; Chinese Academy of Medical Sciences - Peking Union Medical College; Peking Union Medical College; Peking Union Medical College Hospital; Beijing Hospital; Chinese Academy of Me…	2022	10.1038/s41423-022-00934-6	Both preclinical and established rheumatoid arthritis (RA) patients display alterations in the gut microbiome. Prevotella spp. are preferentially enriched in a subset of RA patients. Here, we isolated a Prevotella strain, P. copri RA, from the feces of RA patients and showed that colonization of P. copri RA exacerbated arthritis in a collagen-induced arthritis (CIA) model. With the presence of P.…
244	Li, YX; Liu, C; Luo, J; Zeng, Y; Meng, XL; Wang, SH; Zhang, Y	Ershiwuwei Lvxue Pill alleviates rheumatoid arthritis by different pathways and produces changes in the gut microbiota	PHYTOMEDICINE	Article	Chengdu University of Traditional Chinese Medicine; Chengdu University of Traditional Chinese Medicine; Chengdu University of Traditional Chinese Medicine; Chengdu University of Traditional Chinese Medicine	2022	10.1016/j.phymed.2022.154462	Background: Rheumatoid arthritis (RA) is a systemic autoimmune disease that often results in joint destruction. Ershiwuwei Lvxue Pill (ELP), a prescription of Tibetan medicine, has been used for centuries for the clinical treatment of RA in Tibet, China. In a previous study, we reported that ELP could ameliorate RA symptoms in CIA rats by inhibiting the inflammatory response and inducing apoptosi…
245	Lu, QJ; Li, JY; Lin, HX; Cai, YS; Liu, CS; Fu, LP; Liu, G; Yuan, LX	Danggui Niantong granules ameliorate rheumatoid arthritis by regulating intestinal flora and promoting mitochondrial apoptosis	PHARMACEUTICAL BIOLOGY	Article	Southern Medical University - China; Southern Medical University - China; Southern Medical University - China; Southern Medical University - China; Southern Medical University - China	2022	10.1080/13880209.2022.2107018	Context Danggui Niantong Granules (DGNTG) are a valid and reliable traditional herbal formula, commonly used in clinical practice to treat rheumatoid arthritis (RA). However, the mechanism of its effect on RA remains unclear. Objective An investigation of the therapeutic effects of DGNTG on RA. Materials and methods Twenty-four male Sprague-Dawley (SD) rats were divided into four groups: control,…
246	Hernandez, CJ	Bone Mechanical Function and the Gut Microbiota	UNDERSTANDING THE GUT-BONE SIGNALING AXIS: MECHANISMS AND THERAPEUTIC IMPLICATIONS	Article; Book Chapter	Cornell University; Cornell University	2017	10.1007/978-3-319-66653-2_12
247	Sun, WH; Dai, SP	Tackling Pain Associated with Rheumatoid Arthritis: Proton-Sensing Receptors	ADVANCES IN PAIN RESEARCH: MECHANISMS AND MODULATION OF CHRONIC PAIN	Article; Book Chapter	National Central University	2018	10.1007/978-981-13-1756-9_5	Rheumatoid arthritis (RA), characterized by chronic inflammation of synovial joints, is often associated with ongoing pain and increased pain sensitivity. Chronic pain that comes with RA turns independent, essentially becoming its own disease. It could partly explain that a significant number (50%) of RA patients fail to respond to current RA therapies that focus mainly on suppression of joint in…
248	Audo, R; Sanchez, P; Riviere, B; Mielle, J; Tan, J; Lukas, C; Macia, L; Morel, J; Daien, CI	Rheumatoid arthritis is associated with increased gut permeability and bacterial translocation that are reversed by inflammation control	RHEUMATOLOGY	Article; Early Access	Universite de Montpellier; CHU de Montpellier; Centre National de la Recherche Scientifique (CNRS); CNRS - National Institute for Biology (INSB); Institut National de la Sante et de la Recherche Medicale (Inserm); Universite de Montpellier; Universite de Montpellier; CHU de Montpellier; University of Sydney		10.1093/rheumatology/keac454	Objective To assess how RA and DMARDs affect gut permeability. Methods To explore colonic mucosa integrity, tight junction proteins zonula occludens-1, occludin and claudin 2 were quantified by immunohistochemistry on colonic biopsies in 20 RA patients and 20 age- and sex-matched controls. Staining intensity was assessed by two blinded independent readers. To explore intestinal permeability, seru…
249	Qiao, J; Zhang, SX; Chang, MJ; Cheng, T; Zhang, JQ; Zhao, R; Song, S; Liu, GY; Chang, JS; Li, XF	Specific enterotype of gut microbiota predicted clinical effect of methotrexate in patients with rheumatoid arthritis	RHEUMATOLOGY	Article; Early Access	Shanxi Medical University; Shanxi Medical University; Shanxi Medical University		10.1093/rheumatology/keac458	Objective The most used drug for the treatment of rheumatoid arthritis (RA) remains methotrexate (MTX). Unfortunately, up to 50% of patients do not achieve a clinically adequate outcome. Here we study whether the gut microbiota patterns can aid in the prediction of MTX efficacy for RA. Method To dissect gut microbiome profiles of RA patients (n = 145), 16S rRNA gene sequencing was performed. Diri…
250	Cheng, MY; Zhao, Y; Cui, YZ; Zhong, CF; Zha, YG; Li, SF; Cao, GX; Li, MA; Zhang, L; Ning, K; Han, JX	Stage-specific roles of microbial dysbiosis and metabolic disorders in rheumatoid arthritis	ANNALS OF THE RHEUMATIC DISEASES	Article; Early Access	Shandong First Medical University & Shandong Academy of Medical Sciences; Shandong First Medical University & Shandong Academy of Medical Sciences; University of Jinan; Huazhong University of Science & Technology; Shandong University; Shandong University		10.1136/ard-2022-222871	Objective Rheumatoid arthritis (RA) is a progressive disease including four stages, where gut microbiome is associated with pathogenesis. We aimed to investigate stage-specific roles of microbial dysbiosis and metabolic disorders in RA. Methods We investigated stage-based profiles of faecal metagenome and plasma metabolome of 76 individuals with RA grouped into four stages (stages I-IV) according…
251	Guo, RC; Li, SH; Zhang, Y; Zhang, Y; Wang, GY; Ullah, H; Ma, YF; Yan, QL	Dysbiotic Oral and Gut Viromes in Untreated and Treated Rheumatoid Arthritis Patients	MICROBIOLOGY SPECTRUM	Article; Early Access	Dalian Medical University; China Agricultural University		10.1128/spectrum.00348-22	Our results demonstrated community variation among dental plaque, saliva, and fecal viromes. In oral and gut samples from untreated and treated RA patients, the perturbance of viral composition and the correlation network of microbes and RA-associated clinical indices might be involved in the pathogenicity of RA. Rheumatoid arthritis (RA) is influenced by oral and gut bacteria; however, much less…
252	Round, JL; O'Connell, RM; Mazmanian, SK	Coordination of tolerogenic immune responses by the commensal microbiota	JOURNAL OF AUTOIMMUNITY	Article; Proceedings Paper	California Institute of Technology	2010	10.1016/j.jaut.2009.11.007	All mammals are born ignorant to the existence of micro-organisms. Soon after birth, however, every mammal begins a lifelong association with a multitude of microbes that lay residence on the skin, mouth, vaginal mucosa and gastrointestinal (GI) tract Approximately 500-1000 different species of microbes have highly evolved to occupy these bodily niches, with the highest density and diversity occu…
253	Lyu, MX; Chen, JX; Jiang, YQ; Dong, W; Fang, Z; Li, SC	KDiamend: a package for detecting key drivers in a molecular ecological network of disease	BMC SYSTEMS BIOLOGY	Article; Proceedings Paper	City University of Hong Kong	2018	10.1186/s12918-018-0531-8	Background: Microbial abundance profiles are applied widely to understand diseases from the aspect of microbial communities. By investigating the abundance associations of species or genes, we can construct molecular ecological networks (MENs). The MENs are often constructed by calculating the Pearson correlation coefficient (PCC) between genes. In this work, we also applied multimodal mutual inf…
254	Kalinkovich, A; Gabdulina, G; Livshits, G	Autoimmunity, inflammation, and dysbiosis mutually govern the transition from the preclinical to the clinical stage of rheumatoid arthritis	IMMUNOLOGIC RESEARCH	Article; Proceedings Paper	Tel Aviv University; Sackler Faculty of Medicine; Asfendiyarov Kazakh National Medical University	2018	10.1007/s12026-018-9048-x	Currently, it is well recognized that in the natural history of rheumatoid arthritis (RA), an at-risk phase, characterized by the development of autoimmunity, precedes the onset of clinical symptoms in a large proportion of patients. For individuals who later develop seropositive RA, this manifests as autoantibodies directed against proteins that have undergone specific post-translational modific…
255	Balakrishnan, B; Luckey, D; Taneja, V	Autoimmunity-Associated Gut Commensals Modulate Gut Permeability and Immunity in Humanized Mice	MILITARY MEDICINE	Article; Proceedings Paper	Mayo Clinic; Mayo Clinic	2019	10.1093/milmed/usy309	Objective Although the etiology of rheumatoid arthritis (RA) is unknown, recent studies have led to the concept that gut dysbiosis may be involved in onset. In this study, we aimed to determine if human gut commensals modulate the immune response and gut epithelial integrity in DQ8 mice. Methods DQ8 mice were orally gavaged with RA-associated (Eggerthella lenta or Collinsella aerofaciens) and non…
256	Tlaskalova-Hogenova, H; Stepankova, R; Hudcovic, T; Tuckova, L; Cukrowska, B; Lodinova-Zadnikova, R; Kozakova, H; Rossmann, P; Bartova, J; Sokol, D; Funda, DP; Borovska, D; Rehakova, Z; Sinkora, J; Hofman, J; Drastich, P; Kokesova, A	Commensal bacteria (normal microflora), mucosal immunity and chronic inflammatory and autoimmune diseases	IMMUNOLOGY LETTERS	Review	Czech Academy of Sciences; Institute of Microbiology of the Czech Academy of Sciences; Children's Memorial Health Institute; Institute for Clinical & Experimental Medicine (IKEM); Charles University Prague; Motol University Hospital	2004	10.1016/j.imlet.2004.02.005	Commensal microflora (normal microflora, indigenous microbiota) consists of those micro-organisms, which are present on body surfaces covered by epithelial cells and are exposed to the external environment (gastrointestinal and respiratory tract, vagina, skin, etc.). The number of bacteria colonising mucosal and skin surfaces exceeds the number of cells forming human body. Commensal bacteria co-e…
257	Guarner, F; Bourdet-Sicard, R; Brandtzaeg, P; Gill, HS; McGuirk, P; van Eden, W; Versalovic, J; Weinstock, JV; Rook, GAW	Mechanisms of disease: the hygiene hypothesis revisited	NATURE CLINICAL PRACTICE GASTROENTEROLOGY & HEPATOLOGY	Review	Hospital Universitari Vall d'Hebron; Danone Nutricia; University of Oslo; Trinity College Dublin; Baylor College of Medicine; Baylor College of Medicine; Tufts Medical Center; University of London; University College London; UCL Medical School	2006	10.1038/ncpgasthep0471	In industrialized countries the incidence of diseases caused by immune dysregulation has risen. Epidemiologic studies initially suggested this was connected to a reduction in the incidence of infectious diseases; however, an association with defects in immunoregulation is now being recognized. Effector T(H)1 and T(H)2 cells are controlled by specialized subsets of regulatory T cells. Some pathoge…
258	Takatori, H; Kanno, Y; Chen, Z; O'Shea, JJ	New complexities in helper T cell fate determination and the implications for autoimmune diseases	MODERN RHEUMATOLOGY	Review	National Institutes of Health (NIH) - USA; NIH National Institute of Arthritis & Musculoskeletal & Skin Diseases (NIAMS)	2008	10.1007/s10165-008-0099-z	Recently, new complexities in cell fate decision for helper T cells have emerged. One new lineage, which has come to be called Th17 cells, selectively produces proinflammatory cytokines including interleukin-17 (IL-17, A and F), IL-21, and IL-22. In conjunction with transforming growth factor beta-1 (TGF beta-1), IL-6, IL-21, and IL-23, which activate the transcription factor, signal transducer, …
259	Kranich, J; Maslowski, KM; Mackay, CR	Commensal flora and the regulation of inflammatory and autoimmune responses	SEMINARS IN IMMUNOLOGY	Review	Monash University; Garvan Institute of Medical Research; St Vincents Hospital Sydney; University of New South Wales Sydney	2011	10.1016/j.smim.2011.01.011	The gut microbiota has recently been recognized for its role in immune regulation, and changes in gut microbiota may be the basis for an increased incidence of autoimmune diseases and asthma in developed countries. Beneficial microbes produce factors that are distributed systemically, and therefore can influence peripheral inflammatory responses. Such symbiosis factors are important for the contr…
260	Scher, JU; Abramson, SB	The microbiome and rheumatoid arthritis	NATURE REVIEWS RHEUMATOLOGY	Review	New York University; New York University; NYU Langone Medical Center; Hospital for Joint Disease NYULMC; New York University; NYU Langone Medical Center	2011	10.1038/nrrheum.2011.121	Humans are not (and have never been) alone. From the moment we are born, millions of microorganisms populate our bodies and coexist with us rather peacefully for the rest of our lives. This microbiome represents the totality of micro-organisms (and their genomes) that we necessarily acquire from the environment. Micro-organisms living in or on us have evolved to extract the energy they require to…
261	Shoenfeld, Y	The Future of Autoimmunity	CLINICAL REVIEWS IN ALLERGY & IMMUNOLOGY	Review	Chaim Sheba Medical Center; Tel Aviv University; Sackler Faculty of Medicine	2012	10.1007/s12016-011-8297-4	There have been enormous strides in our understanding of autoimmunity. These strides have come under the umbrellas of epidemiology, immunological phenotype and function, disease definitions and classification and especially new therapeutic reagents. However, while these advances have been herculean, there remains enormous voids. Some of these voids include genetic susceptibility and the interacti…
262	Fung, I; Garrett, JPD; Shahane, A; Kwan, M	Do Bugs Control Our Fate? The Influence of the Microbiome on Autoimmunity	CURRENT ALLERGY AND ASTHMA REPORTS	Review	University of Pennsylvania; University of Pennsylvania; Pennsylvania Medicine; Childrens Hospital of Philadelphia; University of Pennsylvania; Pennsylvania Medicine	2012	10.1007/s11882-012-0291-2	Autoimmune disease has traditionally been thought to be due to the impact of environmental factors on genetically susceptible individuals causing immune dysregulation and loss of tolerance. However, recent literature has highlighted the importance of the microbiome, (a collective genome of microorganisms in a given niche) in immune homeostasis. Increasingly, it has been recognized that disruption…
263	Bedoya, SK; Lam, B; Lau, K; Larkin, J	Th17 Cells in Immunity and Autoimmunity	CLINICAL & DEVELOPMENTAL IMMUNOLOGY	Review	State University System of Florida; University of Florida	2013	10.1155/2013/986789	Th17 and IL-17 play important roles in the clearance of extracellular bacterial and fungal infections. However, strong evidence also implicates the Th17 lineage in several autoimmune disorders including multiple sclerosis, psoriasis, rheumatoid arthritis, inflammatory bowel disease, systemic lupus erythematosus, and asthma. The Th17 subset has also been connected with type I diabetes, although wh…
264	Dylus, E; Buda, B; Gorska-Fraczek, S; Brzozowska, E; Gamian, A	Surface proteins of bacteria of the genus Bifidobacterium	POSTEPY HIGIENY I MEDYCYNY DOSWIADCZALNEJ	Review	Polish Academy of Sciences; Hirszfeld Institute of Immunology & Experimental Therapy of the Polish Academy of Sciences	2013	10.5604/17322693.1049285	Beneficial effects due to the presence of probiotic bacteria of the genus Bifidobacterium in the human intestinal tract are still an interesting object of study. So far activities have been confirmed of bifidobacteria in stimulation of the host immune system, stimulation of tumor cell apoptosis, improvement of bowel motility, alleviation of symptoms of lactose intolerance, cholesterol lowering ca…
265	Bornigen, D; Morgan, XC; Franzosa, EA; Ren, BY; Xavier, RJ; Garrett, WS; Huttenhower, C	Functional profiling of the gut microbiome in disease-associated inflammation	GENOME MEDICINE	Review	Harvard University; Harvard T.H. Chan School of Public Health; Harvard University; Massachusetts Institute of Technology (MIT); Broad Institute; Harvard University; Massachusetts General Hospital; Harvard University; Harvard T.H. Chan School of Public Health; Harvard University; Harvard Medical School; Harvard University; Dana-Farber Cancer Institute	2013	10.1186/gm469	The microbial residents of the human gut are a major factor in the development and lifelong maintenance of health. The gut microbiota differs to a large degree from person to person and has an important influence on health and disease due to its interaction with the human immune system. Its overall composition and microbial ecology have been implicated in many autoimmune diseases, and it represen…
266	Pillai, S	Rethinking mechanisms of autoimmune pathogenesis	JOURNAL OF AUTOIMMUNITY	Review	Harvard University; Harvard Medical School; Massachusetts General Hospital	2013	10.1016/j.jaut.2013.05.003	Why exactly some individuals develop autoimmune disorders remains unclear. The broadly accepted paradigm is that genetic susceptibility results in some break in immunological tolerance, may enhance the availability of autoantigens, and may enhance inflammatory responses. Some environmental insults that occur on this background of susceptibility may then contribute to autoimmunity. In this review …
267	Gibson, DJ; Ryan, EJ; Doherty, GA	Keeping the Bowel Regular: The Emerging Role of Treg as a Therapeutic Target in Inflammatory Bowel Disease	INFLAMMATORY BOWEL DISEASES	Review	University College Dublin; Saint Vincent's University Hospital; University College Dublin	2013	10.1097/MIB.0b013e31829ed7df	The understanding of the intricate mechanisms by which gut immune cells interact with each other and the intestinal flora is constantly developing. The mucosal immune system must retain the ability to mount a prompt response to intestinal pathogens while maintaining tolerance for commensal organisms. Effector T lymphocytes drive inflammation, whereas their actions are counteracted by populations …
268	Luckey, D; Gomez, A; Murray, J; White, B; Taneja, V	Bugs & us: The role of the gut in autoimmunity	INDIAN JOURNAL OF MEDICAL RESEARCH	Review	Mayo Clinic; University of Illinois System; University of Illinois Urbana-Champaign; Mayo Clinic; University of Illinois System; University of Illinois Urbana-Champaign; Mayo Clinic	2013		Rheumatoid arthritis (RA) is a multifactorial disease and requires interaction between genetic and environmental factors for predisposition. The presence of bacterial DNA of the gut residing commensals in synovium as well as dysbiosis of certain commensal bacteria in faecal samples of RA patients as compared to controls suggest a significant role of the gut flora in pathogenesis of RA. The gut co…
269	Owen, JL; Mohamadzadeh, M	Microbial Activation of Gut Dendritic Cells and the Control of Mucosal Immunity	JOURNAL OF INTERFERON AND CYTOKINE RESEARCH	Review	State University System of Florida; University of Florida; State University System of Florida; University of Florida	2013	10.1089/jir.2013.0046	Current data support a role for gut colonization in maintaining balanced mucosal and systemic immune responses and have suggested aberrant innate immune recognition of enteric bacteria as an initiator of the adaptive immune damage associated with inflammatory bowel disease (Crohn's disease and ulcerative colitis). In fact, data from human studies and experimental mouse models have implicated tran…
270	Kuhn, KA; Stappenbeck, TS	Peripheral education of the immune system by the colonic microbiota	SEMINARS IN IMMUNOLOGY	Review	Washington University (WUSTL)	2013	10.1016/j.smim.2013.10.002	There is growing interest in understanding the effects of host-microbial interactions on host physiologic processes. Much of the work in this arena is logically focused on the interaction at mucosal surfaces as this is a primary site of interaction. However, there is ample evidence to suggest that the effects of the microbiota have a much farther reach including the systemic immune system. While …
271	Brusca, SB; Abramson, SB; Scher, JU	Microbiome and mucosal inflammation as extra-articular triggers for rheumatoid arthritis and autoimmunity	CURRENT OPINION IN RHEUMATOLOGY	Review	New York University; New York University	2014	10.1097/BOR.0000000000000008	Purpose of reviewDespite the progress toward understanding the molecular pathogenesis of rheumatoid arthritis (RA), its cause remains elusive. Genes are important but rather insufficient to explain the majority of RA cases. This review describes the novel data supporting the microbiome and its interactions with the human host as potential en(in')vironmental factors in RA pathogenesis.Recent findi…
272	Bedaiwi, MK; Inman, RD	Microbiome and probiotics: link to arthritis	CURRENT OPINION IN RHEUMATOLOGY	Review	University of Toronto; University Toronto Affiliates; University Health Network Toronto	2014	10.1097/BOR.0000000000000075	Purpose of review The gut microbiome plays an integral role in the development and maintenance of the host immune system. Expanding knowledge about this microbial microenvironment has raised the possibility of new treatments based on this knowledge. In this review, we describe the recent evidence of the impact of the gut microbiome on arthritis and possible novel therapeutic approaches to alter t…
273	Sathyabama, S; Khan, N; Agrewala, JN	Friendly pathogens: prevent or provoke autoimmunity	CRITICAL REVIEWS IN MICROBIOLOGY	Review	Council of Scientific & Industrial Research (CSIR) - India; CSIR - Institute of Microbial Technology (IMTECH)	2014	10.3109/1040841X.2013.787043	The gut microflora is an immense health asset for human beings. The mammalian gut harbors trillions of commensals. These microbes not only modulate local but also systemic immunity. Recently, various reports are evolving, which signify that the gut microbes can modulate, tune and tame the host immune response. Consequently, it advocates the significance of the microbial composition. Further, the …
274	Taneja, V	Arthritis susceptibility and the gut microbiome	FEBS LETTERS	Review	Mayo Clinic; Mayo Clinic	2014	10.1016/j.febslet.2014.05.034	Rheumatoid arthritis (RA) is an autoimmune disease with unknown etiology though both genetic and environmental factors have been suggested to be involved in its pathogenesis. While infections and other environmental factors (e.g. smoking) have been studied extensively and show some association, a direct link between all the factors has been difficult to prove. With the recent advances in technolo…
275	Karczewski, J; Poniedzialek, B; Adamski, Z; Rzymski, P	The effects of the microbiota on the host immune system	AUTOIMMUNITY	Review	Poznan University of Medical Sciences; Poznan University of Medical Sciences; Poznan University of Medical Sciences	2014	10.3109/08916934.2014.938322	The human gastrointestinal track harbors hundreds of species of commensal organisms, collectively known as microbiota. The composition of the intestinal microbiota is changeable by various factors, such as host genotype, diet, antibiotics, pathogen infections, among others. Changes in these factors can cause microbiome disruption known as dysbiosis, leading to the outgrowth of potential pathogeni…
276	Rogier, R; Koenders, MI; Abdollahi-Roodsaz, S	Toll-Like Receptor Mediated Modulation of T Cell Response by Commensal Intestinal Microbiota as a Trigger for Autoimmune Arthritis	JOURNAL OF IMMUNOLOGY RESEARCH	Review	Radboud University Nijmegen	2015	10.1155/2015/527696	In autoimmune diseases, a disturbance of the balance between T helper 17 (Th17) and regulatory T cells (Tregs) is often observed. This disturbed balance is also the case in rheumatoid arthritis (RA). Genetic predisposition to RA confers the presence of several polymorphisms mainly regulating activation of T lymphocytes. However, the presence of susceptibility factors is neither necessary nor suff…
277	Burkett, PR; Horste, GMZ; Kuchroo, VK	Pouring fuel on the fire: Th17 cells, the environment, and autoimmunity	JOURNAL OF CLINICAL INVESTIGATION	Review	Harvard University; Harvard Medical School; Harvard University; Brigham & Women's Hospital; Harvard University; Brigham & Women's Hospital	2015	10.1172/JCI78085	Cytokines play a critical role in controlling the differentiation of CD4 Th cells into distinct subsets, including IL-17-producing Th17 cells. Unfortunately, the incidence of a number of autoimmune diseases, particularly those in which the IL-23/IL-17 axis has been implicated, has risen in the last several decades, suggesting that environmental factors can promote autoimmunity. Here we review the…
278	Bubnov, RV; Spivak, MY; Lazarenko, LM; Bomba, A; Boyko, NV	Probiotics and immunity: provisional role for personalized diets and disease prevention	EPMA JOURNAL	Review	National Academy of Sciences Ukraine; Zabolotny Institute of Microbiology & Virology of NASU; University of Pavol Jozef Safarik Kosice	2015	10.1186/s13167-015-0036-0	There is great interest in the interaction between diet and immune system and concomitantly in the potential of probiotic bacteria, especially given recent advances in understanding of gut microbiota effects on health in the context of microbiome research. Following our recent study on bacterial wall elasticity as a predictive measure of phagocytic cellular reactions and related outcomes, a quest…
279	Gomez, A; Luckey, D; Taneja, V	The gut microbiome in autoimmunity: Sex matters	CLINICAL IMMUNOLOGY	Review	Mayo Clinic; University of Minnesota System; University of Minnesota Twin Cities	2015	10.1016/j.clim.2015.04.016	Autoimmune diseases like rheumatoid arthritis are multifactorial in nature, requiring both genetic and environmental factors for onset. Increased predisposition of females to a wide range of autoimmune diseases points to a gender bias in the multifactorial etiology of these disorders. However, the existing evidence to date has not provided any conclusive mechanism of gender-bias beyond the role o…
280	Muszer, M; Noszczynska, M; Kasperkiewicz, K; Skurnik, M	Human Microbiome: When a Friend Becomes an Enemy	ARCHIVUM IMMUNOLOGIAE ET THERAPIAE EXPERIMENTALIS	Review	University of Silesia in Katowice; University of Helsinki; University of Helsinki; Helsinki University Central Hospital	2015	10.1007/s00005-015-0332-3	The microorganisms that inhabit humans are very diverse on different body sites and tracts. Each specific niche contains a unique composition of the microorganisms that are important for a balanced human physiology. Microbial cells outnumber human cells by tenfold and they function as an invisible organ that is called the microbiome. Excessive use of antibiotics and unhealthy diets pose a serious…
281	Ma, YZ; Shi, N; Li, MT; Chen, F; Niu, HT	Applications of Next-generation Sequencing in Systemic Autoimmune Diseases	GENOMICS PROTEOMICS & BIOINFORMATICS	Review	Chinese Academy of Medical Sciences - Peking Union Medical College; Institute of Laboratory Animal Science - CAMS; Chinese Academy of Medical Sciences - Peking Union Medical College; Peking Union Medical College; Chinese Academy of Medical Sciences - Peking Union Medical College; Peking Union Medical College Hospital; Chinese Academy of Medical Sciences - Peking Union Medical College; Peking Unio…	2015	10.1016/j.gpb.2015.09.004	Systemic autoimmune diseases are a group of heterogeneous disorders caused by both genetic and environmental factors. Although numerous causal genes have been identified by genome-wide association studies (GWAS), these susceptibility genes are correlated to a relatively low disease risk, indicating that environmental factors also play an important role in the pathogenesis of disease. The intestin…
282	Sandhya, P; Danda, D; Sharma, D; Scaria, V	Does the buck stop with the bugs?: an overview of microbial dysbiosis in rheumatoid arthritis	INTERNATIONAL JOURNAL OF RHEUMATIC DISEASES	Review	Christian Medical College & Hospital (CMCH) Vellore; Council of Scientific & Industrial Research (CSIR) - India; CSIR - Institute of Genomics & Integrative Biology (IGIB); Academy of Scientific & Innovative Research (AcSIR)	2016	10.1111/1756-185X.12728	The human body is an environmental niche which is home to diverse co-habiting microbes collectively referred as the human microbiome. Recent years have seen the in-depth characterization of the human microbiome and associations with diseases. Linking of the composition or number of the human microbiota with diseases and traits date back to the original work of Elie Metchnikoff. Recent advances in…
283	Catrina, AI; Deane, KD; Scher, JU	Gene, environment, microbiome and mucosal immune tolerance in rheumatoid arthritis	RHEUMATOLOGY	Review	Karolinska Institutet; Karolinska University Hospital; University of Colorado System; University of Colorado Anschutz Medical Campus; New York University; NYU Langone Medical Center; Hospital for Joint Disease NYULMC	2016	10.1093/rheumatology/keu469	RA is a complex multifactorial chronic disease that transitions through several stages. Multiple studies now support that there is a prolonged phase in early RA development during which there is serum elevation of RA-related autoantibodies including RF and ACPAs in the absence of clinically evident synovitis. This suggests that RA pathogenesis might originate in an extra-articular location, which…
284	Wu, XH; He, B; Liu, J; Feng, H; Ma, YH; Li, DF; Guo, BS; Liang, C; Dang, L; Wang, LY; Tian, J; Zhu, HL; Xiao, LB; Lu, C; Lu, AP; Zhang, G	Molecular Insight into Gut Microbiota and Rheumatoid Arthritis	INTERNATIONAL JOURNAL OF MOLECULAR SCIENCES	Review	Hong Kong Baptist University; Hong Kong Baptist University; China Academy of Chinese Medical Sciences; Institute of Basic Research In Clinical Medicine, CACMS	2016	10.3390/ijms17030431	Rheumatoid arthritis (RA) is a systemic, inflammatory, and autoimmune disorder. Gut microbiota play an important role in the etiology of RA. With the considerable progress made in next-generation sequencing techniques, the identified gut microbiota difference between RA patients and healthy individuals provides an updated overview of the association between gut microbiota and RA. We reviewed the …
285	Bravo-Blas, A; Wessel, H; Milling, S	Microbiota and arthritis: correlations or cause?	CURRENT OPINION IN RHEUMATOLOGY	Review	University of Glasgow	2016	10.1097/BOR.0000000000000261	Purpose of reviewThe microorganisms that colonise our bodies, the commensal microbiota', respond to changes in our behaviour and environment, and can also profoundly affect our health. We can now investigate these organisms with unprecedented depth and precision, revealing that they may contribute to the pathogenesis of diseases including arthritis. Here we discuss the changes occurring in the mi…
286	Mankia, K; Emery, P	A new window of opportunity in rheumatoid arthritis: targeting at-risk individuals	CURRENT OPINION IN RHEUMATOLOGY	Review		2016	10.1097/BOR.0000000000000268	Purpose of review Progress in our understanding of the preclinical events in rheumatoid arthritis (RA) has provided important insights into disease pathogenesis. Studying prospective cohorts of individuals at risk for RA development offers the opportunity to accurately characterize the sequence of events in preclinical disease as well as quantify the risk of different preclinical phenotypes. Thes…
287	Salvador, B; Arranz, A; Francisco, S; Cordoba, L; Punzon, C; Llamas, MA; Fresno, M	Modulation of endothelial function by Toll like receptors	PHARMACOLOGICAL RESEARCH	Review	Autonomous University of Madrid; Consejo Superior de Investigaciones Cientificas (CSIC); CSIC - Centro de Biologia Molecular Severo Ochoa (CBM)	2016	10.1016/j.phrs.2016.03.038	Endothelial cells (EC) are able to actively control vascular permeability, coagulation, blood pressure and angiogenesis. Most recently, a role for endothelial cells in the immune response has been described. Therefore, the endothelium has a dual role controlling homeostasis but also being the first line for host defence and tissue damage repair thanks to its ability to mount an inflammatory respo…
288	Floreani, A; Leung, PSC; Gershwin, ME	Environmental Basis of Autoimmunity	CLINICAL REVIEWS IN ALLERGY & IMMUNOLOGY	Review	University of Padua; University of California System; University of California Davis	2016	10.1007/s12016-015-8493-8	The three common themes that underlie the induction and perpetuation of autoimmunity are genetic predisposition, environmental factors, and immune regulation. Environmental factors have gained much attention for their role in triggering autoimmunity, with increasing evidence of their influence as demonstrated by epidemiological studies, laboratory research, and animal studies. Environmental facto…
289	Forbes, JD; Van Domselaar, G; Bernstein, CN	The Gut Microbiota in Immune-Mediated Inflammatory Diseases	FRONTIERS IN MICROBIOLOGY	Review	University of Manitoba; Public Health Agency of Canada; University of Manitoba; University of Manitoba	2016	10.3389/fmicb.2016.01081	The collection of microbes and their genes that exist within and on the human body, collectively known as the microbiome has emerged as a principal factor in human health and disease. Humans and microbes have established a symbiotic association over time, and perturbations in this association have been linked to several immune-mediated inflammatory diseases (IMID) including inflammatory bowel dis…
290	Wang, J; Jia, HJ	Metagenome-wide association studies: fine-mining the microbiome	NATURE REVIEWS MICROBIOLOGY	Review	Beijing Genomics Institute (BGI)	2016	10.1038/nrmicro.2016.83	Metagenome-wide association studies (MWAS) have enabled the high-resolution investigation of associations between the human microbiome and several complex diseases, including type 2 diabetes, obesity, liver cirrhosis, colorectal cancer and rheumatoid arthritis. The associations that can be identified by MWAS are not limited to the identification of taxa that are more or less abundant, as is the c…
291	Diamanti, AP; Rosado, MM; Lagana, B; D'Amelio, R	Microbiota and chronic inflammatory arthritis: an interwoven link	JOURNAL OF TRANSLATIONAL MEDICINE	Review	Sapienza University Rome; Azienda Ospedaliera Sant'Andrea; Sapienza University Rome; Azienda Ospedaliera Sant'Andrea	2016	10.1186/s12967-016-0989-3	Background: Only recently, the scientific community gained insights on the importance of the intestinal resident flora for the host's health and disease. Gut microbiota in fact plays a crucial role in modulating innate and acquired immune responses and thus interferes with the fragile balance inflammation versus tolerance. Main body: Correlations between gut bacteria composition and the severity …
292	Shamriz, O; Mizrahi, H; Werbner, M; Shoenfeld, Y; Avni, O; Koren, O	Microbiota at the crossroads of autoimmunity	AUTOIMMUNITY REVIEWS	Review	Hebrew University of Jerusalem; Bar Ilan University; Chaim Sheba Medical Center; Tel Aviv University; Sackler Faculty of Medicine	2016	10.1016/j.autrev.2016.07.012	Autoimmune diseases have a multifactorial etiology including genetic and environmental factors. Recently, there has been increased appreciation of the critical involvement of the microbiota in the pathogenesis of autoimmunity, although in many cases, the cause and the consequence are not easy to distinguish. Here, we suggest that many of the known cues affecting the function of the immune system,…
293	Hernandez, CJ; Guss, JD; Luna, M; Goldring, SR	Links Between the Microbiome and Bone	JOURNAL OF BONE AND MINERAL RESEARCH	Review	Cornell University; Cornell University	2016	10.1002/jbmr.2887	The human microbiome has been shown to influence a number of chronic conditions associated with impaired bone mass and bone quality, including obesity, diabetes, and inflammatory bowel disease. The connection between the microbiome and bone health, however, has not been well studied. The few studies available demonstrate that the microbiome can have a large effect on bone remodeling and bone mass…
294	Wang, P; Tao, JH; Pan, HF	Probiotic bacteria: a viable adjuvant therapy for relieving symptoms of rheumatoid arthritis	INFLAMMOPHARMACOLOGY	Review	Anhui Medical University	2016	10.1007/s10787-016-0277-0	The burgeoning use of probiotics has proliferated during the past two decades. However, the effect of probiotic administration for either the prevention or treatment of rheumatoid arthritis (RA) has been investigated in a limited number of studies. Randomized controlled clinical trials have provided evidences that specific probiotics supplementation exhibit anti-inflammatory effects, help to incr…
295	Kim, D; Yoo, SA; Kim, WU	Gut microbiota in autoimmunity: potential for clinical applications	ARCHIVES OF PHARMACAL RESEARCH	Review	Catholic University of Korea; Catholic University of Korea; Catholic University of Korea	2016	10.1007/s12272-016-0796-7	Microbial habitation in the human body begins immediately after birth, and adults are colonized by microbes outnumbering human cells by a factor of ten. Especially, intestinal track is a living space for diverse microbial species that have coevolved symbiotically. A principal function of the gut microbiota is to protect the host from harmful bacteria and to provide benefits for the host through s…
296	Rosser, EC; Mauri, C	A clinical update on the significance of the gut microbiota in systemic autoimmunity	JOURNAL OF AUTOIMMUNITY	Review	University of London; University College London; University of London; University College London	2016	10.1016/j.jaut.2016.06.009	Systemic lupus erythematosus (SLE) is a complex autoimmune disease where a loss of tolerance to nuclear antigens leads to inflammation in multiple organ systems. The cause of SLE remains ill defined, although it is known that a complex interplay between genes and environment is necessary for disease development. In recent years, case studies have reported that the incidence of SLE in the USA, for…
297	van der Meulen, TA; Harmsen, HJM; Bootsma, H; Spijkervet, FKL; Kroese, FGM; Vissink, A	The microbiome-systemic diseases connection	ORAL DISEASES	Review	University of Groningen; University of Groningen; University of Groningen	2016	10.1111/odi.12472	The human microbiome consists of all microorganisms occupying the skin, mucous membranes and intestinal tract of the human body. The contact of the mucosal immune system with the human microbiome is a balanced interplay between defence mechanisms of the immune system and symbiotic or pathogenic microbial factors, such as microbial antigens and metabolites. In systemic autoimmune diseases (SADs) s…
298	Zhou, ZJ; Ding, M; Huang, L; Gilkeson, G; Lang, R; Jiang, W	Toll-like receptor-mediated immune responses in intestinal macrophages; implications for mucosal immunity and autoimmune diseases	CLINICAL IMMUNOLOGY	Review	Medical University of South Carolina; Fifth Medical Center of Chinese PLA General Hospital; Medical University of South Carolina; Capital Medical University; Medical University of South Carolina	2016	10.1016/j.clim.2016.09.005	Monocytes are precursors of macrophages and key players during inflammation and pathogen challenge in the periphery, whereas intestinal resident macrophages act as innate effector cells to engulf and clear bacteria, secrete cytokines, and maintain intestinal immunity and homeostasis. However, perturbation of toll-like receptor signaling pathway in intestinal macrophages has been associated with t…
299	Breban, M	Gut microbiota and inflammatory joint diseases	JOINT BONE SPINE	Review	Assistance Publique Hopitaux Paris (APHP); Hopital Universitaire Ambroise-Pare - APHP; UDICE-French Research Universities; Universite Paris Cite; Institut National de la Sante et de la Recherche Medicale (Inserm); UDICE-French Research Universities; Universite Paris Saclay	2016	10.1016/j.jbspin.2016.04.005	In most chronic inflammatory diseases, the cause remains unknown. Chronic infection is, however, among the current hypotheses. Recent technological advances have allowed in-depth studies of the gut microflora, or microbiota, which contains a vast array of organisms, most of which cannot be cultured. Inflammatory bowel disease has been associated with distinctive changes in the gut microbiota, whi…
300	Horta-Baas, G; Romero-Figueroa, MD; Montiel-Jarquin, AJ; Pizano-Zarate, ML; Garcia-Mena, J; Ramirez-Duran, N	Intestinal Dysbiosis and Rheumatoid Arthritis: A Link between Gut Microbiota and the Pathogenesis of Rheumatoid Arthritis	JOURNAL OF IMMUNOLOGY RESEARCH	Review	Instituto Mexicano del Seguro Social; Instituto Mexicano del Seguro Social; Instituto Mexicano del Seguro Social; Universidad Nacional Autonoma de Mexico; CINVESTAV - Centro de Investigacion y de Estudios Avanzados del Instituto Politecnico Nacional; Universidad Autonoma del Estado de Mexico	2017	10.1155/2017/4835189	Characterization and understanding of gut microbiota has recently increased representing a wide research field, especially in autoimmune diseases. Gut microbiota is the major source of microbes which might exert beneficial as well as pathogenic effects on human health. Intestinal microbiome's role as mediator of inflammation has only recently emerged. Microbiota has been observed to differ in sub…
301	Biscetti, F; Flex, A; Alivernini, S; Tolusso, B; Gremese, E; Ferraccioli, G	The Role of High-Mobility Group Box-1 and Its Crosstalk with Microbiome in Rheumatoid Arthritis	MEDIATORS OF INFLAMMATION	Review	Catholic University of the Sacred Heart; IRCCS Policlinico Gemelli; Catholic University of the Sacred Heart; IRCCS Policlinico Gemelli	2017	10.1155/2017/5230374	Rheumatoid arthritis (RA) is a chronic, definitely disabling, and potentially severe autoimmune disease. Although an increasing number of patients are affected, a key treatment for all patients has not been discovered. High-mobility group box-1 (HMGB1) is a nuclear protein passively and actively released by almost all cell types after several stimuli. HMGB1 is involved in RA pathogenesis, but a c…
302	Lin, L; Zhang, JQ	Role of intestinal microbiota and metabolites on gut homeostasis and human diseases	BMC IMMUNOLOGY	Review	Southeast University - China; Southeast University - China	2017	10.1186/s12865-016-0187-3	Background: A vast diversity of microbes colonizes in the human gastrointestinal tract, referred to intestinal microbiota. Microbiota and products thereof are indispensable for shaping the development and function of host innate immune system, thereby exerting multifaceted impacts in gut health. Methods: This paper reviews the effects on immunity of gut microbe-derived nucleic acids, and gut micr…
303	Pan, HD; Li, RZ; Li, T; Wang, J; Liu, L	Whether Probiotic Supplementation Benefits Rheumatoid Arthritis Patients: A Systematic Review and Meta-Analysis	ENGINEERING	Review	Macau University of Science & Technology; Macau University of Science & Technology	2017	10.1016/J.ENG.2017.01.006	Gut and oral microflora are important factors in the pathogenesis and development of rheumatoid arthritis (RA). Recent studies have shown that probiotic supplements have beneficial consequences on experimental arthritis in rats. However, results from randomized clinical trials on the effects of probiotics have not been consistent. The aim of this study was to systematically review the existing ev…
304	Shi, N; Li, N; Duan, XW; Niu, HT	Interaction between the gut microbiome and mucosal immune system	MILITARY MEDICAL RESEARCH	Review	Chinese Academy of Medical Sciences - Peking Union Medical College; Institute of Laboratory Animal Science - CAMS; Chinese Academy of Medical Sciences - Peking Union Medical College; Peking Union Medical College; Nanchang University	2017	10.1186/s40779-017-0122-9	The gut microbiota, the largest symbiotic ecosystem with the host, has been shown to play important roles in maintaining intestinal homeostasis. Dysbiosis of the gut microbiome is caused by the imbalance between the commensal and pathogenic microbiomes. The commensal microbiome regulates the maturation of the mucosal immune system, while the pathogenic microbiome causes immunity dysfunction, resu…
305	Kim, D; Zeng, MY; Nunez, G	The interplay between host immune cells and gut microbiota in chronic inflammatory diseases	EXPERIMENTAL AND MOLECULAR MEDICINE	Review	Catholic University of Korea; University of Michigan System; University of Michigan; University of Michigan System; University of Michigan	2017	10.1038/emm.2017.24	Many benefits provided by the gut microbiota to the host rely on its intricate interactions with host cells. Perturbations of the gut microbiota, termed gut dysbiosis, affect the interplay between the gut microbiota and host cells, resulting in dysregulation of inflammation that contributes to the pathogenesis of chronic inflammatory diseases, including inflammatory bowel disease, multiple sclero…
306	Lee, N; Kim, WU	Microbiota in T-cell homeostasis and inflammatory diseases	EXPERIMENTAL AND MOLECULAR MEDICINE	Review	Catholic University of Korea; Catholic University of Korea; Seoul St. Mary's Hospital	2017	10.1038/emm.2017.36	The etiology of disease pathogenesis can be largely explained by genetic variations and several types of environmental factors. In genetically disease-susceptible individuals, subsequent environmental triggers may induce disease development. The human body is colonized by complex commensal microbes that have co-evolved with the host immune system. With the adaptation to modern lifestyles, its com…
307	Maeda, Y; Takeda, K	Role of Gut Microbiota in Rheumatoid Arthritis	JOURNAL OF CLINICAL MEDICINE	Review	Osaka University; Japan Science & Technology Agency (JST); Osaka University	2017	10.3390/jcm6060060	Rheumatoid arthritis (RA) is a systemic autoimmune disease, caused by both genetic and environmental factors. Recently, investigators have focused on the gut microbiota, which is thought to be an environmental agent affecting the development of RA. Here we review the evidence from animal and human studies that supports the role of the gut microbiota in RA. We and others have demonstrated that the…
308	Bogdanos, DP; Sakkas, LI	From microbiome to infectome in autoimmunity	CURRENT OPINION IN RHEUMATOLOGY	Review	University of Thessaly	2017	10.1097/BOR.0000000000000394	Purpose of review The current review discusses the pros and cons of the microbiome studies conducted in search of the association between microbiota and autoimmunity. Recent findings We focus on the role of infectome and autoinfectome as a bridge to link the findings of microbiome studies with those emerging from investigations of the role of specific viruses and antiviral responses as triggers o…
309	Larsen, JM	The immune response to Prevotella bacteria in chronic inflammatory disease	IMMUNOLOGY	Review	Technical University of Denmark	2017	10.1111/imm.12760	The microbiota plays a central role in human health and disease by shaping immune development, immune responses and metabolism, and by protecting from invading pathogens. Technical advances that allow comprehensive characterization of microbial communities by genetic sequencing have sparked the hunt for disease-modulating bacteria. Emerging studies in humans have linked the increased abundance of…
310	Chen, BD; Sun, LX; Zhang, X	Integration of microbiome and epigenome to decipher the pathogenesis of autoimmune diseases	JOURNAL OF AUTOIMMUNITY	Review	Chinese Academy of Medical Sciences - Peking Union Medical College; Peking Union Medical College Hospital; Chinese Academy of Medical Sciences - Peking Union Medical College; Peking Union Medical College; Tsinghua University	2017	10.1016/j.jaut.2017.03.009	The interaction between genetic predisposition and environmental factors are of great significance in the pathogenesis and development of autoimmune diseases (AIDs). The human mucosa is the most frequent site that interacts with the exterior environment, and commensal microbiota at the gut and other human mucosal cavities play a crucial role in the regulation of immune system. Growing evidence ha…
311	de Oliveira, GLV; Leite, AZ; Higuchi, BS; Gonzaga, MI; Mariano, VS	Intestinal dysbiosis and probiotic applications in autoimmune diseases	IMMUNOLOGY	Review	Hospital de Cancer de Barretos	2017	10.1111/imm.12765	In humans, a complex interaction between the host immune system and commensal microbiota is required to maintain gut homeostasis. In this symbiotic relationship, the microbiota provides carbohydrate fermentation and digestion, vitamin synthesis and gut-associated lymphoid tissue development, as well as preventing colonization by pathobionts, whereas the host offers a niche and nutrients for the s…
312	Jethwa, H; Abraham, S	The evidence for microbiome manipulation in inflammatory arthritis	RHEUMATOLOGY	Review	Imperial College London	2017	10.1093/rheumatology/kew374	The human body consists of millions of commensal bacteria (the microbiome), with the intestinal tract being the most prevalent site of colonization. This colonization process begins at birth, and despite numerous factors such as ageing, diet and drug use affecting the microbiome make-up, by adulthood the composition of the gut bacteria is relatively consistent across local populations. The recent…
313	Semerano, L; Julia, C; Aitisha, O; Boissier, MC	Nutrition and chronic inflammatory rheumatic disease	JOINT BONE SPINE	Review	Institut National de la Sante et de la Recherche Medicale (Inserm); Universite Paris 13; Assistance Publique Hopitaux Paris (APHP); Hopital Universitaire Avicenne - APHP; UDICE-French Research Universities; Universite Paris Cite; Universite Paris 13; heSam Universite; Conservatoire National Arts & Metiers (CNAM); INRAE; Institut National de la Sante et de la Recherche Medicale (Inserm); UDICE-Fre…	2017	10.1016/j.jbspin.2016.10.003	Nutrition is a major environmental influence on human health. Epidemiological and interventional studies suggest a pathophysiological or therapeutic role, respectively, for nutrition in inflammatory rheumatic diseases (IRDs). Nevertheless, the associations between nutrition and IRDs are often weak and inconsistent, and the available clinical trials on nutrition are methodologically flawed. Experi…
314	Betancourt, AB; Lyu, QK; Broere, F; Sijts, A; Rutten, VPMG; van Eden, W	T Cell-Mediated Chronic Inflammatory Diseases Are Candidates for Therapeutic Tolerance induction with Heat Shock Proteins	FRONTIERS IN IMMUNOLOGY	Review	Utrecht University; University of Cambridge	2017	10.3389/fimmu.2017.01408	Failing immunological tolerance for critical self-antigens is the problem underlying most chronic inflammatory diseases of humans. Despite the success of novel immunosuppressive biological drugs, the so-called biologics, in the treatment of diseases such rheumatoid arthritis (RA) and type 1 diabetes, none of these approaches does lead to a permanent state of medicine free disease remission. There…
315	Dougan, M	Checkpoint Blockade Toxicity and immune Homeostasis in the Gastrointestinal Tract	FRONTIERS IN IMMUNOLOGY	Review	Harvard University; Massachusetts General Hospital	2017	10.3389/fimmu.2017.01547	Monoclonal antibodies targeting the regulatory immune checkpoint receptors CTLA-4, PD-1, and PD-L1 are now standard therapy for diverse malignancies including melanoma, lung cancer, and renal cell carcinoma. Although effective in many patients and able to induce cures in some, targeting these regulatory pathways has led to a new class of immune-related adverse events. In many respects, these immu…
316	Caminer, AC; Haberman, R; Scher, JU	Human microbiome, infections, and rheumatic disease	CLINICAL RHEUMATOLOGY	Review	National University of Rosario; New York University; New York University; NYU Langone Medical Center; Hospital for Joint Disease NYULMC; New York University; NYU Langone Medical Center; Hospital for Joint Disease NYULMC	2017	10.1007/s10067-017-3875-3	Microbes have coevolved with their human hosts for millions of years and are vital to their normal development and homoeostasis. It is now clear that there is direct and indirect cross talk between the microbiome and host immune responses. However, the exact mechanisms for this microbial influence in disease pathogenesis remain elusive and are now a major research focus.
317	Garcia-Rayado, G; Navarro, M; Lanas, A	NSAID induced gastrointestinal damage and designing GI-sparing NSAIDs	EXPERT REVIEW OF CLINICAL PHARMACOLOGY	Review	Lozano Blesa University Clinical Hospital; CIBER - Centro de Investigacion Biomedica en Red; CIBEREHD; University of Zaragoza	2018	10.1080/17512433.2018.1516143	NSAIDs are widely used to treat pain and rheumatic conditions, but they induce adverse events in different body systems, although the major, most frequent events occur in the upper and lower gastrointestinal (GI) tracts. Areas covered: This review is focused on damage caused by NSAIDs in the upper and lower GI tracts, the different mechanisms of damage and the GI-sparing NSAIDs designed to minimi…
318	Villanueva-Romero, R; Gutierrez-Canas, I; Carrion, M; Perez-Garcia, S; Seoane, IV; Martinez, C; Gomariz, RP; Juarranz, Y	The Anti-Inflammatory Mediator, Vasoactive Intestinal Peptide, Modulates the Differentiation and Function of Th Subsets in Rheumatoid Arthritis	JOURNAL OF IMMUNOLOGY RESEARCH	Review	Complutense University of Madrid	2018	10.1155/2018/6043710	Genetic background, epigenetic modifications, and environmental factors trigger autoimmune response in rheumatoid arthritis (RA). Several pathogenic infections have been related to the onset of RA and may cause an inadequate immunological tolerance towards critical self-antigens leading to chronic joint inflammation and an imbalance between different T helper (Th) subsets. Vasoactive intestinal p…
319	Zhong, DL; Wu, CY; Zeng, XF; Wang, Q	The role of gut microbiota in the pathogenesis of rheumatic diseases	CLINICAL RHEUMATOLOGY	Review	Chinese Academy of Medical Sciences - Peking Union Medical College; Peking Union Medical College Hospital; Chinese Academy of Medical Sciences - Peking Union Medical College; Peking Union Medical College	2018	10.1007/s10067-017-3821-4	Rheumatic diseases refer to many diseases with a loss of immune self-tolerance, leading to a chronic inflammation, degeneration, or metabolic derangement in multiple organs or tissues. The cause of rheumatic diseases remains to be elucidated, though both environmental and genetic factors are required for the development of rheumatic diseases. Over the past decades, emerging studies suggested that…
320	Clemente, JC; Manasson, J; Scher, JU	The role of the gut microbiome in systemic inflammatory disease	BMJ-BRITISH MEDICAL JOURNAL	Review	Icahn School of Medicine at Mount Sinai; New York University; NYU Langone Medical Center; Hospital for Joint Disease NYULMC	2018	10.1136/bmj.j5145	The role of the gut microbiome in models of inflammatory and autoimmune disease is now well characterized. Renewed interest in the human microbiome and its metabolites, as well as notable advances in host mucosal immunology, has opened multiple avenues of research to potentially modulate inflammatory responses. The complexity and interdependence of these diet-microbe-metabolite-host interactions …
321	Wirthgen, E; Hoeflich, A; Rebl, A; Gunther, J	Kynurenic Acid: The Janus-Faced Role of an Immunomodulatory Tryptophan Metabolite and its Link to Pathological Conditions	FRONTIERS IN IMMUNOLOGY	Review	Forschungsinstitut fur Nutztierbiologie (FBN)	2018	10.3389/fimmu.2017.01957	Tryptophan metabolites are known to participate in the regulation of many cells of the immune system and are involved in various immune-mediated diseases and disorders. Kynurenic acid (KYNA) is a product of one branch of the kynurenine pathway of tryptophan metabolism. The influence of KYNA on important neurophysiological and neuropathological processes has been comprehensively documented. In rec…
322	Picchianti-Diamanti, A; Rosado, MM; D'Amelio, R	Infectious Agents and Inflammation: The Role of Microbiota in Autoimmune Arthritis	FRONTIERS IN MICROBIOLOGY	Review	Sapienza University Rome; Azienda Ospedaliera Sant'Andrea	2018	10.3389/fmicb.2017.02696	In higher vertebrates, mucosal sites at the border between the internal and external environments, directly interact with bacteria, viruses, and fungi. Through co-evolution, hosts developed mechanisms of tolerance or ignorance toward some infectious agents, because hosts established gain of function interactions with symbiotic bacteria. Indeed, some bacteria assist hosts in different functions, a…
323	van Hamburg, JP; Tas, SW	Molecular mechanisms underpinning T helper 17 cell heterogeneity and functions in rheumatoid arthritis	JOURNAL OF AUTOIMMUNITY	Review	University of Amsterdam; Academic Medical Center Amsterdam; Vrije Universiteit Amsterdam; University of Amsterdam; Academic Medical Center Amsterdam	2018	10.1016/j.jaut.2017.12.006	T helper 17 (Th17) cells are important mediators of immune responses against extracellular bacteria and fungi, and as such play critical regulatory roles in maintaining mucosal homeostasis. Conversely, Th17 cells and their effector molecules interleukin 17A (IL-17A), IL-17F, interferon (IFN)gamma, tumor necrosis factor (TNF)alpha, and granulocyte-macrophage colony-stimulating factor (GM-CSF) are …
324	Heeney, DD; Gareau, MG; Marco, ML	Intestinal Lactobacillus in health and disease, a driver or just along for the ride?	CURRENT OPINION IN BIOTECHNOLOGY	Review	University of California System; University of California Davis; University of California System; University of California Davis	2018	10.1016/j.copbio.2017.08.004	Metagenomics and related methods have led to significant advances in our understanding of the human microbiome. Members of the genus Lactobacillus, although best understood for essential roles in food fermentations and applications as probiotics, have also come to the fore in a number of untargeted gut microbiome studies in humans and animals. Even though Lactobacillus is only a minor member of t…
325	Lee, GR	The Balance of Th17 versus Treg Cells in Autoimmunity	INTERNATIONAL JOURNAL OF MOLECULAR SCIENCES	Review	Sogang University	2018	10.3390/ijms19030730	T helper type 17 (Th17) cells and pTreg cells, which share a common precursor cell (the naive CD4 T cell), require a common tumor growth factor (TGF)-beta signal for initial differentiation. However, terminally differentiated cells fulfill opposite functions: Th17 cells cause autoimmunity and inflammation, whereas Treg cells inhibit these phenomena and maintain immune homeostasis. Thus, unravelin…
326	Kasselman, LJ; Vernice, NA; DeLeon, J; Reiss, AB	The gut microbiome and elevated cardiovascular risk in obesity and autoimmunity	ATHEROSCLEROSIS	Review	New York University; New York University	2018	10.1016/j.atherosclerosis.2018.02.036	Cardiovascular disease associated with obesity and autoimmunity is the leading cause of death in these populations and significant residual risk remains despite current treatment approaches. Obesity, type 1 diabetes mellitus (T1DM), rheumatoid arthritis (RA), and systemic lupus erythematosus (SLE) are linked to chronic inflammation, and subjects with these disorders have characteristic shifts in …
327	Tai, FWD; McAlindon, ME	NSAIDs and the small bowel	CURRENT OPINION IN GASTROENTEROLOGY	Review	University of Sheffield	2018	10.1097/MOG.0000000000000427	Purpose of reviewThe review describes the effects of NSAID gastrointestinal toxicity on the small bowel, wherein injury is as prevalent as in the gastroduodenum. This is well documented by capsule endoscopy, which also provides an endoscopic endpoint for novel treatment strategies.Recent findingsAppreciation of the prevalence of NSAID enteropathy has grown with capsule endoscopy and the use of co…
328	Masuko, K	A Potential Benefit of Balanced Diet for Rheumatoid Arthritis	FRONTIERS IN MEDICINE	Review	International University of Health & Welfare	2018	10.3389/fmed.2018.00141	Although it is largely unknown how diet might modulate rheumatoid arthritis (RA), dietary interventions, including so-called low-carbohydrate diets, may be considered for RA patients because of the high incidence of cardiovascular comorbidity. However, it has been shown that restriction or skewed intake of particular nutrient may alter the components of the intestinal flora. Changes to the gut mi…
329	Li, B; Selmi, C; Tang, RQ; Gershwin, ME; Ma, X	The microbiome and autoimmunity: a paradigm from the gut-liver axis	CELLULAR & MOLECULAR IMMUNOLOGY	Review	Shanghai Jiao Tong University; IRCCS Humanitas Research Hospital; University of Milan; University of California System; University of California Davis	2018	10.1038/cmi.2018.7	Microbial cells significantly outnumber human cells in the body, and the microbial flora at mucosal sites are shaped by environmental factors and, less intuitively, act on host immune responses, as demonstrated by experimental data in germ-free and gnotobiotic studies. Our understanding of this link stems from the established connection between infectious bacteria and immune tolerance breakdown, …
330	Medina, G; Vera-Lastra, O; Peralta-Amaro, AL; Jimenez-Arellano, MP; Saavedra, MA; Cruz-Dominguez, MP; Jara, LJ	Metabolic syndrome, autoimmunity and rheumatic diseases	PHARMACOLOGICAL RESEARCH	Review	Instituto Mexicano del Seguro Social; Instituto Mexicano del Seguro Social; Universidad Veracruzana; Instituto Mexicano del Seguro Social; Instituto Mexicano del Seguro Social; Instituto Mexicano del Seguro Social; Universidad Nacional Autonoma de Mexico	2018	10.1016/j.phrs.2018.01.009	Metabolic syndrome (MetS) is a cluster of metabolic and cardiovascular (CV) risk factors including obesity and visceral adiposity, insulin resistance, dyslipidemia and hypertension contributing to CV mortality. The interface between the metabolic and immune systems has been of great interest recently. These interactions are regulated through genetics, nutritional status, and the intestinal microb…
331	Sakkas, LI; Bogdanos, DP	Multiple hit infection and autoimmunity: the dysbiotic microbiota-ACPA connection in rheumatoid arthritis	CURRENT OPINION IN RHEUMATOLOGY	Review	General University Hospital of Larissa	2018	10.1097/BOR.0000000000000503	Purpose of review This review highlights the most recent data obtained in this field and provides clues toward the better understanding of the close interplay between microbiota and host, leading to autoimmune diseases. Recent findings A well-described model of microbiota/host interaction of relevance to autoimmunity is linking anti-citrullinated peptide antibody positive rheumatoid arthritis and…
332	Liu, YY; Alookaran, JJ; Rhoads, JM	Probiotics in Autoimmune and Inflammatory Disorders	NUTRIENTS	Review	University of Texas System; University of Texas Health Science Center Houston	2018	10.3390/nu10101537	Probiotics have been used to ameliorate gastrointestinal symptoms since ancient times. Over the past 40 years, probiotics have been shown to impact the immune system, both in vivo and in vitro. This interaction is linked to gut microbes, their polysaccharide antigens, and key metabolites produced by these bacteria. At least four metabolic pathways have been implicated in mechanistic studies of pr…
333	de Sire, R; Rizzatti, G; Ingravalle, F; Pizzoferrato, M; Petito, V; Lopetuso, L; Graziani, C; de Sire, A; Mentella, MC; Mele, MC; Gasbarrini, A; Scaldaferri, F	Skeletal muscle-gut axis: emerging mechanisms of sarcopenia for intestinal and extra intestinal diseases	MINERVA GASTROENTEROLOGICA E DIETOLOGICA	Review	Catholic University of the Sacred Heart; IRCCS Policlinico Gemelli; Catholic University of the Sacred Heart; IRCCS Policlinico Gemelli; Universita della Campania Vanvitelli	2018	10.23736/S1121-421X.18.02511-4	In recent years, there has been an increasing interest on muscle wasting, considering the reduction of quality of life and the increase of morbidity and mortality associated. Sarcopenia and cachexia represent two conditions of reduction of muscle mass, sharing several elements involved in their pathogenesis, such as systemic inflammation, impaired muscle protein synthesis, increased muscle apopto…
334	Strzepa, A; Lobo, FM; Majewska-Szczepanik, M; Szczepanik, M	Antibiotics and autoimmune and allergy diseases: Causative factor or treatment?	INTERNATIONAL IMMUNOPHARMACOLOGY	Review	Jagiellonian University; Collegium Medicum Jagiellonian University; Yale University	2018	10.1016/j.intimp.2018.10.021	The newborn infant emerges from an almost sterile environment into a world of bacteria. Bacteria colonize the infant's skin, lungs, and, of most importance, the gut. The process of bacterial colonization is coordinated, and each body niche acquires a unique composition of bacteria. In the gut, most bacteria belong to the Firmkutes and Bacteroidetes phyla, while Actinobacteria and Proteobacteria a…
335	Guerreiro, CS; Calado, A; Sousa, J; Fonseca, JE	Diet, Microbiota, and Gut Permeability-The Unknown Triad in Rheumatoid Arthritis	FRONTIERS IN MEDICINE	Review	Universidade de Lisboa; Universidade de Lisboa; Universidade de Lisboa; Universidade de Lisboa; Universidade de Lisboa; Hospital Santa Maria	2018	10.3389/fmed.2018.00349	Growing experimental and clinical evidence suggests that a chronic inflammatory response induced by gut dysbiosis can critically contribute to the development of rheumatic diseases, including rheumatoid arthritis (RA). Of interest, an adherence to a Mediterranean diet has been linked to a reduction in mortality and morbidity in patients with inflammatory diseases. Diet and intestinal microbiota a…
336	Espina, MD; Gabarrini, G; Harmsen, HJM; Westra, J; van Winkelhoff, AJ; van Dijl, JM	Talk to your gut: the oral-gut microbiome axis and its immunomodulatory role in the etiology of rheumatoid arthritis	FEMS MICROBIOLOGY REVIEWS	Review	University of Groningen; University of Groningen; University of Groningen	2019	10.1093/femsre/fuy035	Microbial communities inhabiting the human body, collectively called the microbiome, are critical modulators of immunity. This notion is underpinned by associations between changes in the microbiome and particular autoimmune disorders. Specifically, in rheumatoid arthritis, one of the most frequently occurring autoimmune disorders worldwide, changes in the oral and gut microbiomes have been impli…
337	Ibanez, L; Rouleau, M; Wakkach, A; Blin-Wakkach, C	Gut microbiome and bone	JOINT BONE SPINE	Review	Centre National de la Recherche Scientifique (CNRS); UDICE-French Research Universities; Universite Cote d'Azur; UDICE-French Research Universities; Universite Cote d'Azur; Universidad CEU Cardenal Herrera	2019	10.1016/j.jbspin.2018.02.008	The gut microbiome is now viewed as a tissue that interacts bidirectionally with the gastrointestinal, immune, endocrine and nervous systems, affecting the cellular responses in numerous organs. Evidence is accumulating of gut microbiome involvement in a growing number of pathophysiological processes, many of which are linked to inflammatory responses. More specifically, data acquired over the la…
338	De Luca, F; Shoenfeld, Y	The microbiome in autoimmune diseases	CLINICAL AND EXPERIMENTAL IMMUNOLOGY	Review	Chaim Sheba Medical Center; Tel Aviv University; Sackler Faculty of Medicine	2019	10.1111/cei.13158	The microbiome is represented by microorganisms which live in a symbiotic way with the mammalian. Microorganisms have the ability to influence different physiological aspects such as the immune system, metabolism and behaviour. In recent years, several studies have highlighted the role of the microbiome in the pathogenesis of autoimmune diseases. Notably, in systemic lupus erythematosus an altera…
339	Graves, DT; Correa, JD; Silva, TA	The Oral Microbiota Is Modified by Systemic Diseases	JOURNAL OF DENTAL RESEARCH	Review	University of Pennsylvania; Universidade Federal de Minas Gerais	2019	10.1177/0022034518805739	Periodontal diseases are initiated by bacteria that accumulate in a biofilm on the tooth surface and affect the adjacent periodontal tissue. Systemic diseases such as diabetes, rheumatoid arthritis (RA), and systemic lupus erythematosus (SLE) increase susceptibility to destructive periodontal diseases. In human studies and in animal models, these diseases have been shown to enhance inflammation i…
340	Dehner, C; Fine, R; Kriegel, MA	The microbiome in systemic autoimmune disease: mechanistic insights from recent studies	CURRENT OPINION IN RHEUMATOLOGY	Review	Yale University	2019	10.1097/BOR.0000000000000574	Purpose of review The resident bacterial communities and the host immune system have coevolved for millennia. However, recent changes in modern societies have disrupted this coevolutionary homeostasis and contributed to a rise in immune-mediated conditions. The purpose of this review is to provide an overview of recently elucidated mechanisms of how certain taxa within the bacterial microbiome pr…
341	Kiousi, DE; Karapetsas, A; Karolidou, K; Panayiotidis, MI; Pappa, A; Galanis, A	Probiotics in Extraintestinal Diseases: Current Trends and New Directions	NUTRIENTS	Review	Democritus University of Thrace; Northumbria University; University of Dundee	2019	10.3390/nu11040788	Probiotics are defined as live microorganisms that when administered in adequate amounts confer a health benefit to the host. Their positive supplementation outcomes on several gastrointestinal disorders are well defined. Nevertheless, their actions are not limited to the gut, but may also impart their beneficial effects at distant sites and organs. In this regard, in this review article we: (i) …
342	Sprouse, ML; Bates, NA; Felix, KM; Wu, HJJ	Impact of gut microbiota on gut-distal autoimmunity: a focus on T cells	IMMUNOLOGY	Review	University of Arizona; University of Arizona	2019	10.1111/imm.13037	The immune system is essential for maintaining a delicate balance between eliminating pathogens and maintaining tolerance to self-tissues to avoid autoimmunity. An enormous and complex community of gut microbiota provides essential health benefits to the host, particularly by regulating immune homeostasis. Many of the metabolites derived from commensals can impact host health by directly regulati…
343	Yasuda, K; Takeuchi, Y; Hirota, K	The pathogenicity of Th17 cells in autoimmune diseases	SEMINARS IN IMMUNOPATHOLOGY	Review	Kyoto University; Osaka University; Kyoto University	2019	10.1007/s00281-019-00733-8	IL-17-producing T helper (Th17) cells have been implicated in the pathogenesis of many inflammatory and autoimmune diseases. Targeting the effector cytokines IL-17 and GM-CSF secreted by autoimmune Th17 cells has been shown to be effective for the treatment of the diseases. Understanding a molecular basis of Th17 differentiation and effector functions is therefore critical for the regulation of t…
344	Sales-Campos, H; Soares, SC; Oliveira, CJF	An introduction of the role of probiotics in human infections and autoimmune diseases	CRITICAL REVIEWS IN MICROBIOLOGY	Review	Universidade Federal do Triangulo Mineiro; Universidade Federal de Goias	2019	10.1080/1040841X.2019.1621261	During the last decades, studies exploring the role of microorganisms inhabiting human body in different scenarios have demonstrated the great potential of modulating them to treat and prevent diseases. Among the most outstanding applications, probiotics have been used for over a century to treat infections and inflammation. Despite the beneficial role of other probiotics, Lactobacillus and Bifid…
345	Berthelot, JM; Sellam, J; Maugars, Y; Berenbaum, F	Cartilage-gut-microbiome axis: a new paradigm for novel therapeutic opportunities in osteoarthritis	RMD OPEN	Review	Nantes Universite; CHU de Nantes; UDICE-French Research Universities; Sorbonne Universite; Institut National de la Sante et de la Recherche Medicale (Inserm); Assistance Publique Hopitaux Paris (APHP); Hopital Universitaire Saint-Antoine - APHP; UDICE-French Research Universities; Sorbonne Universite	2019	10.1136/rmdopen-2019-001037	DNA of gut microbiota can be found in synovium of osteoarthritis and rheumatoid arthritis. This finding could result from the translocation of still alive bacteria from gut to joints through blood, since the diversified dormant microbiota of healthy human blood can be transiently resuscitated in vitro. The recent finding of gut microbiome in human cartilage, which differed between osteoarthritis …
346	Luu, M; Visekruna, A	Short-chain fatty acids: Bacterial messengers modulating the immunometabolism of T cells	EUROPEAN JOURNAL OF IMMUNOLOGY	Review	Philipps University Marburg	2019	10.1002/eji.201848009	Short-chain fatty acids (SCFAs) are mainly generated by bacterial fermentation of non-digestible carbohydrates such as dietary fiber. In the last decade, new investigations have revealed that SCFAs have a very specific function and serve as active microbial metabolites, which are able to modulate the function of immune cells in the intestine and other tissues. Recent studies have highlighted the …
347	Lucchino, B; Spinelli, FR; Iannuccelli, C; Guzzo, MP; Conti, F; Di Franco, M	Mucosa-Environment Interactions in the Pathogenesis of Rheumatoid Arthritis	CELLS	Review	Sapienza University Rome	2019	10.3390/cells8070700	Mucosal surfaces play a central role in the pathogenesis of rheumatoid arthritis (RA). Several risk factors, such as cigarette smoking, environmental pollution, and periodontitis interact with the host at the mucosal level, triggering immune system activation. Moreover, the alteration of microbiota homeostasis is gaining increased attention for its involvement in the disease pathogenesis, modulat…
348	Huang, CR; Shi, GC	Smoking and microbiome in oral, airway, gut and some systemic diseases	JOURNAL OF TRANSLATIONAL MEDICINE	Review	Shanghai Jiao Tong University; Shanghai Jiao Tong University	2019	10.1186/s12967-019-1971-7	The human microbiome harbors a diverse array of microbes which establishes a mutually beneficial relation with the host in healthy conditions, however, the dynamic homeostasis is influenced by both host and environmental factors. Smoking contributes to modifications of the oral, lung and gut microbiome, leading to various diseases, such as periodontitis, asthma, chronic obstructive pulmonary dise…
349	Bodkhe, R; Balakrishnan, B; Taneja, V	The role of microbiome in rheumatoid arthritis treatment	THERAPEUTIC ADVANCES IN MUSCULOSKELETAL DISEASE	Review	Mayo Clinic	2019	10.1177/1759720X19844632	Rheumatoid arthritis (RA) is an autoimmune disorder with multifactorial etiology; both genetic and environmental factors are known to be involved in pathogenesis. Treatment with disease-modifying antirheumatic drugs (DMARDs) plays an essential role in controlling disease progression and symptoms. DMARDs have immunomodulatory properties and suppress immune response by interfering in various pro-in…
350	Chan, MM; Yang, XF; Wang, H; Saaoud, F; Sun, Y; Fong, DN	The Microbial Metabolite Trimethylamine N-Oxide Links Vascular Dysfunctions and the Autoimmune Disease Rheumatoid Arthritis	NUTRIENTS	Review	Pennsylvania Commonwealth System of Higher Education (PCSHE); Temple University; Pennsylvania Commonwealth System of Higher Education (PCSHE); Temple University; Pennsylvania Commonwealth System of Higher Education (PCSHE); Temple University; Rutgers State University New Brunswick	2019	10.3390/nu11081821	Diet and microbiota each have a direct impact on many chronic, inflammatory, and metabolic diseases. As the field develops, a new perspective is emerging. The effects of diet may depend on the microbiota composition of the intestine. A diet that is rich in choline, red meat, dairy, or egg may promote the growth, or change the composition, of microbial species. The microbiota, in turn, may produce…
351	Salem, F; Kindt, N; Marchesi, JR; Netter, P; Lopez, A; Kokten, T; Danese, S; Jouzeau, JY; Peyrin-Biroulee, L; Moulin, D	Gut microbiome in chronic rheumatic and inflammatory bowel diseases: Similarities and differences	UNITED EUROPEAN GASTROENTEROLOGY JOURNAL	Review	Centre National de la Recherche Scientifique (CNRS); CNRS - Institute for Engineering & Systems Sciences (INSIS); Universite de Lorraine; Imperial College London; Cardiff University; Institut National de la Sante et de la Recherche Medicale (Inserm); Universite de Lorraine; CHU de Nancy; Humanitas University; CHU de Nancy	2019	10.1177/2050640619867555	Introduction:Inflammatory bowel diseases (IBDs) and chronic rheumatic diseases (CRDs) are systemic chronic disorders sharing common genetic, immune and environmental factors. About half of patients with IBD develop rheumatic ailments and microscopic intestinal inflammation is present in up to half of CRD patients. IBD and CRD patients also share a common therapeutic armamentarium. Disequilibrium …
352	Nogueira, AR; Shoenfeld, Y	Microbiome and autoimmune diseases: cause and effect relationship	CURRENT OPINION IN RHEUMATOLOGY	Review	Universidade de Coimbra; Universidade de Coimbra; Centro Hospitalar e Universitario de Coimbra (CHUC); Chaim Sheba Medical Center; Tel Aviv University; Ministry of Health of the Russian Federation; Sechenov First Moscow State Medical University	2019	10.1097/BOR.0000000000000628	Purpose of review The human body is the host of trillions of different prokaryotic microorganisms that colonize the skin and the mucosae. The interaction between human cells and these organisms is mediated by the immune system, sustaining a very complex and fragile balance. The immune cells need to prevent uncontrolled growth of pathogenic microbes and promote tolerance toward the existence of th…
353	Alwarith, J; Kahleova, H; Rembert, E; Yonas, W; Dort, S; Calcagno, M; Burgess, N; Crosby, L; Barnard, ND	Nutrition Interventions in Rheumatoid Arthritis: The Potential Use of Plant-Based Diets. A Review	FRONTIERS IN NUTRITION	Review	George Washington University	2019	10.3389/fnut.2019.00141	Rheumatoid arthritis (RA), a chronic inflammatory autoimmune disease, affects roughly 1% of the world's population. RA pathogenesis remains unclear, but genetic factors account for 50-60% of the risk while the remainder might be linked to modifiable factors, such as infectious diseases, tobacco smoking, gut bacteria, and nutrition. Dietary triggers may play an inciting role in the autoimmune proc…
354	Lorenzo, D; GianVincenzo, Z; Luca, RC; Karan, G; Villafane, JH; Roberto, M; Javad, P	Oral-Gut Microbiota and Arthritis: Is There an Evidence-Based Axis?	JOURNAL OF CLINICAL MEDICINE	Review	University of Milan; University of Milan; University of Milan; Jefferson University; Rothman Institute; IRCCS Fondazione Don Carlo Gnocchi Onlus; University of Milan	2019	10.3390/jcm8101753	The gut microbiome appears to be a significant contributor to musculoskeletal health and disease. Recently, it has been found that oral microbiota are involved in arthritis pathogenesis. Microbiome composition and its functional implications have been associated with the prevention of bone loss and/or reducing fracture risk. The link between gut-oral microbiota and joint inflammation in animal mo…
355	Moghadam, ZM; Hosseini, HM; Amin, M; Behzadi, E; Fooladi, AAI	Microbial metabolite effects on TLR to develop autoimmune diseases	TOXIN REVIEWS	Review	Baqiyatallah University of Medical Sciences (BMSU); Tehran University of Medical Sciences; Islamic Azad University	2019	10.1080/15569543.2018.1469512	The mammalians harbor and are exposed to various populations of microorganisms, that interact with the immune system and are able to affect the balance of immune responses. Modifications of commensal flora can result in dysregulation of immune responses. Toll-like receptors (TLRs) are not only of importance in eliciting the immune responses against pathogens, but also show a significant role in t…
356	Pellicano, C; Leodori, G; Innocenti, GP; Gigante, A; Rosato, E	Microbiome, Autoimmune Diseases and HIV Infection: Friends or Foes?	NUTRIENTS	Review	Sapienza University Rome; Sapienza University Rome	2019	10.3390/nu11112629	Several studies highlighted the importance of the interaction between microbiota and the immune system in the development and maintenance of the homeostasis of the human organism. Dysbiosis is associated with proinflammatory and pathological state-like metabolic diseases, autoimmune diseases and HIV infection. In this review, we discuss the current understanding of the possible role of dysbiosis …
357	Ding, TT; Niu, HQ; Zhao, XC; Gao, C; Li, XF; Wang, CH	T-Follicular Regulatory Cells: Potential Therapeutic Targets in Rheumatoid Arthritis	FRONTIERS IN IMMUNOLOGY	Review	Shanxi Medical University; Harvard University; Brigham & Women's Hospital; Harvard Medical School; Harvard University; Boston Children's Hospital; Harvard Medical School	2019	10.3389/fimmu.2019.02709	Rheumatoid arthritis (RA) is an incurable aggressive chronic inflammatory joint disease with a worldwide prevalence. High levels of autoantibodies and chronic inflammation may be involved in the pathology. Notably, T follicular regulatory (Tfr) cells are critical mediators of T follicular helper (Tfh) cell generation and antibody production in the germinal center (GC) reaction. Changes in the num…
358	Bergot, AS; Giri, R; Thomas, R	The microbiome and rheumatoid arthritis	BEST PRACTICE & RESEARCH IN CLINICAL RHEUMATOLOGY	Review	University of Queensland; Mater Research; University of Queensland	2019	10.1016/j.berh.2020.101497	Rheumatoid Arthritis (RA) is a severe, chronic autoimmune disease that affects 1% of the world's population. Familial risk contributes 50% of the risk of seropositive RA, with strongest risks seen in first-degree relatives. Smoking increases the risk of developing anti-citrullinated peptide antibody (ACPA)(+) RA, particularly in individuals with high-risk RA-susceptibility alleles. Other contribu…
359	Chriswell, ME; Kuhn, KA	Microbiota-mediated mucosal inflammation in arthritis	BEST PRACTICE & RESEARCH IN CLINICAL RHEUMATOLOGY	Review	University of Colorado System; University of Colorado Anschutz Medical Campus	2019	10.1016/j.berh.2020.101492	Mucosal surfaces are a unique symbiotic environment between a host and a vast and diverse ecology of microbes. These microbes have great immunomodulatory potential with respect to the host organism. Indeed, the mucosal immune system strikes a delicate balance between tolerance of commensal organisms and overt inflammation to ward off pathogens. Disruptions of the microbial ecology at mucosal surf…
360	Xu, HJ; Yin, J	HLA risk alleles and gut microbiome in ankylosing spondylitis and rheumatoid arthritis	BEST PRACTICE & RESEARCH IN CLINICAL RHEUMATOLOGY	Review	Naval Medical University; Tsinghua University; Tsinghua University	2019	10.1016/j.berh.2020.101499	Human leukocyte antigen (HLA) alleles are associated with a variety of autoimmune diseases. The composition of gut microbiome can be influenced by host immunity, which is partially regulated by HLA. In this review, first we provide evidence from animal and human studies on: if and how HLA-B27, HLA-DRB1 (shared epitope (SE)), and other HLA alleles alter the gut microbiome, then we analyzed the dat…
361	Maeda, Y; Takeda, K	Host-microbiota interactions in rheumatoid arthritis	EXPERIMENTAL AND MOLECULAR MEDICINE	Review	Osaka University; Japan Science & Technology Agency (JST); Osaka University	2019	10.1038/s12276-019-0283-6	The gut microbiota has been proposed to be an important environmental factor in the development of rheumatoid arthritis (RA). Here, we review a growing body of evidence from human and animal studies that supports the hypothesis that intestinal microbiota play a role in RA. Previous studies from we and others showed an altered composition of the microbiota in early RA patients. A recent study demo…
362	Berthelot, JM; Wendling, D	Translocation of dead or alive bacteria from mucosa to joints and epiphyseal bone-marrow: facts and hypotheses	JOINT BONE SPINE	Review	Nantes Universite; CHU de Nantes; Universite de Franche-Comte	2020	10.1016/j.jbspin.2019.01.004	The recent demonstration that DNA from several mucosal bacteria, including Prevotella spp, could be found in numerous tissues (mesenteric lymph nodes, spleen, serum, liver, lung, eye and ankle joints), either in HLA-B27 rats with or without arthritis, or control rats without HLA-B27, could be a revolution in our understanding of spondyloarthritis and close disorders, including rheumatoid arthriti…
363	Yamamoto, EA; Jorgensen, TN	Relationships Between Vitamin D, Gut Microbiome, and Systemic Autoimmunity	FRONTIERS IN IMMUNOLOGY	Review	Case Western Reserve University; Cleveland Clinic Foundation; Cleveland Clinic Foundation	2020	10.3389/fimmu.2019.03141	There is increasing recognition of the role the microbiome plays in states of health and disease. Microbiome studies in systemic autoimmune diseases demonstrate unique microbial patterns in Inflammatory Bowel Disease, Rheumatoid Arthritis, and Systemic Lupus Erythematosus to a lesser extent, whereas there is no single bug or pattern that characterizes Multiple Sclerosis. Autoimmune diseases tend …
364	Konig, MF	The microbiome in autoimmune rheumatic disease	BEST PRACTICE & RESEARCH IN CLINICAL RHEUMATOLOGY	Review	Johns Hopkins University	2020	10.1016/j.berh.2019.101473	Microbial contributions to the immunopathogenesis of autoimmune rheumatic diseases have been studied since the advent of germ theory in the 19th century. With the exception of Group A Streptococcus in rheumatic fever, early studies failed to establish causal relationships between specific pathobionts and rheumatic disease. Today, systemic autoimmune diseases are thought to result from a complex i…
365	Meng, TT; Zhang, SB; Wang, DW; Zhang, HJ; Song, ZY; Li, SD; Chen, M; Tang, CZ	Association between antibiotic use and the risk of rheumatoid arthritis A protocol for a systematic review	MEDICINE	Review	Macau University of Science & Technology; Guangzhou University of Chinese Medicine; Southern Medical University - China; Gansu University of Chinese Medicine; Gansu University of Chinese Medicine; Macau University of Science & Technology; Guangzhou University of Chinese Medicine	2020	10.1097/MD.0000000000019155	Background: The potential association between antibiotic use and the risk of rheumatoid arthritis (RA) has drawn significant attention from clinicians and researchers in recent years due to the wild usage of antibiotic. This study aimed to perform a systematic review and meta-analysis of the literature to determine if antibiotic use is associated with an increased risk of RA, so as to provide an …
366	Jiao, YH; Wu, L; Huntington, ND; Zhang, X	Crosstalk Between Gut Microbiota and Innate Immunity and Its Implication in Autoimmune Diseases	FRONTIERS IN IMMUNOLOGY	Review	Chinese Academy of Medical Sciences - Peking Union Medical College; Peking Union Medical College; Peking Union Medical College Hospital; Tsinghua University; Tsinghua University; Monash University; Chinese Academy of Medical Sciences - Peking Union Medical College; Peking Union Medical College	2020	10.3389/fimmu.2020.00282	The emerging concept of microbiota contributing to local mucosal homeostasis has fueled investigation into its specific role in immunology. Gut microbiota is mostly responsible for maintaining the balance between host defense and immune tolerance. Dysbiosis of gut microbiota has been shown to be related to various alterations of the immune system. This review focuses on the reciprocal relationshi…
367	Venter, C; Eyerich, S; Sarin, T; Klatt, KC	Nutrition and the Immune System: A Complicated Tango	NUTRIENTS	Review	Children's Hospital Colorado; University of Colorado System; University of Colorado Anschutz Medical Campus; Technical University of Munich; Helmholtz Association; Helmholtz-Center Munich - German Research Center for Environmental Health; Technical University of Munich; Baylor College of Medicine; United States Department of Agriculture (USDA)	2020	10.3390/nu12030818	Enthusiasm exists for the potential of diet to impact the immune system, prevent disease and its therapeutic potential. Herein, we describe the challenge to nutrition scientists in defining this relationship through case studies of diets and nutrients in the context of allergic and autoimmune diseases. Moderate-quality evidence exists from both human intervention and observational studies to sugg…
368	Vojdani, A; Gushgari, LR; Vojdani, E	Interaction between food antigens and the immune system: Association with autoimmune disorders	AUTOIMMUNITY REVIEWS	Review	Loma Linda University	2020	10.1016/j.autrev.2020.102459	It has been shown that environmental factors such as infections, chemicals, and diet play a major role in autoimmune diseases; however, relatively little attention has been given to food components as the most prevalent modifiers of these afflictions. This review summarizes the current body of knowledge related to different mechanisms and associations between food proteins/peptides and autoimmune…
369	Scher, JU; Nayak, RR; Ubeda, C; Turnbaugh, PJ; Abramson, SB	Pharmacomicrobiomics in inflammatory arthritis: gut microbiome as modulator of therapeutic response	NATURE REVIEWS RHEUMATOLOGY	Review	New York University; University of California System; University of California San Francisco; University of California System; University of California San Francisco	2020	10.1038/s41584-020-0395-3	In the past three decades, extraordinary advances have been made in the understanding of the pathogenesis of, and treatment options for, inflammatory arthritides, including rheumatoid arthritis and spondyloarthritis. The use of methotrexate and subsequently biologic therapies (such as TNF inhibitors, among others) and oral small molecules have substantially improved clinical outcomes for many pat…
370	Gioia, C; Lucchino, B; Tarsitano, MG; Iannuccelli, C; Di Franco, M	Dietary Habits and Nutrition in Rheumatoid Arthritis: Can Diet Influence Disease Development and Clinical Manifestations?	NUTRIENTS	Review	Sapienza University Rome; Sapienza University Rome	2020	10.3390/nu12051456	Rheumatoid arthritis (RA) is a systemic, autoimmune disease characterized by joint involvement, with progressive cartilage and bone destruction. Genetic and environmental factors determine RA susceptibility. In recent years, an increasing number of studies suggested that diet has a central role in disease risk and progression. Several nutrients, such as polyunsaturated fatty acids, present anti-i…
371	Watanabe, T; Fujiwara, Y; Chan, FKL	Current knowledge on non-steroidal anti-inflammatory drug-induced small-bowel damage: a comprehensive review	JOURNAL OF GASTROENTEROLOGY	Review	Osaka Metropolitan University; Chinese University of Hong Kong	2020	10.1007/s00535-019-01657-8	Recent advances in small-bowel endoscopy such as capsule endoscopy have shown that non-steroidal anti-inflammatory drugs (NSAIDs) frequently damage the small intestine, with the prevalence rate of mucosal breaks of around 50% in chronic users. A significant proportion of patients with NSAIDs-induced enteropathy are asymptomatic, but some patients develop symptomatic or complicated ulcers that nee…
372	Bellone, M; Brevi, A; Huber, S	Microbiota-Propelled T Helper 17 Cells in Inflammatory Diseases and Cancer	MICROBIOLOGY AND MOLECULAR BIOLOGY REVIEWS	Review	Vita-Salute San Raffaele University; IRCCS Ospedale San Raffaele; Vita-Salute San Raffaele University; University of Hamburg; University Medical Center Hamburg-Eppendorf	2020	10.1128/MMBR.00064-19	Technologies allowing genetic sequencing of the human microbiome are opening new realms to discovery. The host microbiota substantially impacts immune responses both in immune-mediated inflammatory diseases (IMIDs) and in tumors affecting tissues beyond skin and mucosae. However, a mechanistic link between host microbiota and cancer or IMIDs has not been well established. Here, we propose T helpe…
373	Niccolai, E; Boem, F; Emmi, G; Amedei, A	The link Cancer and autoimmune diseases in the light of microbiota: Evidence of a potential culprit	IMMUNOLOGY LETTERS	Review	University of Florence; University of Milan; University of Turin; University of Florence; Azienda Ospedaliero Universitaria Careggi	2020	10.1016/j.imlet.2020.03.001	Evidence establishes that chronic inflammation and autoimmunity are associated with cancer development and patients with a primary malignancy may develop autoimmune-like diseases. Despite immune dysregulation is a common feature of both cancer and autoimmune diseases, precise mechanisms underlying this susceptibility are not clarified and different hypotheses have been proposed, starting from gen…
374	Fujimoto, K; Uematsu, S	Vaccine therapy for dysbiosis-related diseases	WORLD JOURNAL OF GASTROENTEROLOGY	Review	Osaka Metropolitan University; University of Tokyo; University of Tokyo; University of Tokyo	2020	10.3748/wjg.v26.i21.2758	Progress in genomic analysis has resulted in the proposal that the intestinal microbiota is a crucial environmental factor in the development of multifactorial diseases, such as obesity, diabetes, rheumatoid arthritis, and inflammatory bowel diseases represented by Crohn's disease and ulcerative colitis. Dysregulated gut microbiome contributes to the pathogenesis of such disorders; however, there…
375	Reyes-Castillo, Z; Valdes-Miramontes, E; Llamas-Covarrubias, M; Munoz-Valle, JF	Troublesome friends within us: the role of gut microbiota on rheumatoid arthritis etiopathogenesis and its clinical and therapeutic relevance	CLINICAL AND EXPERIMENTAL MEDICINE	Review	Universidad de Guadalajara; Universidad de Guadalajara	2021	10.1007/s10238-020-00647-y	The role of gut microbiota on immune regulation and the development of autoimmune diseases such as rheumatoid arthritis (RA) is an emerging research topic. Multiple studies have demonstrated alterations on gut microbiota composition and/or function (referred to as dysbiosis) both in early and established RA patients. Still, research delineating the molecular mechanisms by which gut microorganisms…
376	Rocha, FAC; Duarte-Monteiro, AM; da Mota, LMH; Pinto, ACMD; Fonseca, JE	Microbes, helminths, and rheumatic diseases	BEST PRACTICE & RESEARCH IN CLINICAL RHEUMATOLOGY	Review	Universidade Federal do Ceara; Universidade de Lisboa; Hospital Santa Maria; Universidade de Lisboa; Universidade de Brasilia	2020	10.1016/j.berh.2020.101528	There has been a progressive interest on modifications of the human defense system following insults occurring in the interface between our body and the external environment, as they may provoke or worsen disease states. Studies suggest that billions of germs, which compose the gut microbiota influence one's innate and adaptive immune responses at the intestinal level, but these microorganisms ma…
377	Christman, LM; Gu, LW	Efficacy and mechanisms of dietary polyphenols in mitigating rheumatoid arthritis	JOURNAL OF FUNCTIONAL FOODS	Review	State University System of Florida; University of Florida	2020	10.1016/j.jff.2020.104003	Rheumatoid arthritis is an autoimmune disease characterized by chronic inflammation in the joints, leukocyte infiltration in the synovium, and joint and bone degradation. It affects about 1% of the world's population, mostly women and elderly, but has no medical cure. Patients are recommended to manage their conditions through lifestyle changes and medications. Mounting evidence from clinical tri…
378	Brown, J; Robusto, B; Morel, L	Intestinal Dysbiosis and Tryptophan Metabolism in Autoimmunity	FRONTIERS IN IMMUNOLOGY	Review	State University System of Florida; University of Florida	2020	10.3389/fimmu.2020.01741	The development of autoimmunity involves complex interactions between genetics and environmental triggers. The gut microbiota is an important environmental constituent that can heavily influence both local and systemic immune reactivity through distinct mechanisms. It is therefore a relevant environmental trigger or amplifier to consider in autoimmunity. This review will examine recent evidence f…
379	Maseda, D; Ricciotti, E	NSAID-Gut Microbiota Interactions	FRONTIERS IN PHARMACOLOGY	Review	University of Pennsylvania; University of Pennsylvania; University of Pennsylvania; Pennsylvania Medicine	2020	10.3389/fphar.2020.01153	Nonsteroidal anti-inflammatory drugs (NSAID)s relieve pain, inflammation, and fever by inhibiting the activity of cyclooxygenase isozymes (COX-1 and COX-2). Despite their clinical efficacy, NSAIDs can cause gastrointestinal (GI) and cardiovascular (CV) complications. Moreover, NSAID use is characterized by a remarkable individual variability in the extent of COX isozyme inhibition, therapeutic ef…
380	Zhang, X; Chen, BD; Zhao, LD; Li, H	The Gut Microbiota: Emerging Evidence in Autoimmune Diseases	TRENDS IN MOLECULAR MEDICINE	Review	Chinese Academy of Medical Sciences - Peking Union Medical College; Peking Union Medical College Hospital; Chinese Academy of Medical Sciences - Peking Union Medical College; Peking Union Medical College; Harvard University; Beth Israel Deaconess Medical Center; Harvard Medical School	2020	10.1016/j.molmed.2020.04.001	The pathogenesis of autoimmune diseases (AIDs) is not only attributed to genetic susceptibilities but also environmental factors, among which, disturbed gut microbiota has attracted increasing attention. Compositional and functional changes of gut microbiota have been reported in various AIDs, and increasing evidence suggests that disturbed gut microbiota contributes to their immunopathogenesis. …
381	Xu, HH; Zhao, HY; Fan, DP; Liu, MJ; Cao, JF; Xia, Y; Ju, DH; Xiao, C; Guan, QD	Interactions between Gut Microbiota and Immunomodulatory Cells in Rheumatoid Arthritis	MEDIATORS OF INFLAMMATION	Review	China Academy of Chinese Medical Sciences; Experimental Research Center, CACMS; China-Japan Friendship Hospital; Chinese Academy of Medical Sciences - Peking Union Medical College; Peking Union Medical College; Beijing University of Chinese Medicine; China-Japan Friendship Hospital; CancerCare Manitoba Foundation; University of Manitoba	2020	10.1155/2020/1430605	Rheumatoid arthritis (RA) is one of the most common autoimmune diseases caused by abnormal immune activation and immune tolerance. Immunomodulatory cells (ICs) play a critical role in the maintenance and homeostasis of normal immune function and in the pathogenesis of RA. The human gastrointestinal tract is inhabited by trillions of commensal microbiota on the mucosal surface that play a fundamen…
382	Aponte, M; Murru, N; Shoukat, M	Therapeutic, Prophylactic, and Functional Use of Probiotics: A Current Perspective	FRONTIERS IN MICROBIOLOGY	Review	University of Naples Federico II; University of Naples Federico II	2020	10.3389/fmicb.2020.562048	Probiotics are considered as the twenty-first century panpharmacon due to their competent remedial power to cure from gastrointestinal dysbiosis, systematic metabolic diseases, and genetic impairments up to complicated neurodegenerative disorders. They paved the way for an innovative managing of various severe diseases through palatable food products. The probiotics' role as a bio-therapy increas…
383	Rooney, CM; Mankia, K; Emery, P	The Role of the Microbiome in Driving RA-Related Autoimmunity	FRONTIERS IN CELL AND DEVELOPMENTAL BIOLOGY	Review	University of Leeds	2020	10.3389/fcell.2020.538130	Once referred to as normal commensal flora the human microbiome plays an integral role between health and disease. The host mucosal surface replete with a multitude of immune cells is a vast arena constantly sensing and responding to antigen presentation and microbial by-products. It is this key role that may allow the microbiome to prime or protect the host from autoimmune disease. Rheumatoid ar…
384	Marietta, E; Mangalam, AK; Taneja, V; Murray, JA	Intestinal Dysbiosis in, and Enteral Bacterial Therapies for, Systemic Autoimmune Diseases	FRONTIERS IN IMMUNOLOGY	Review	Mayo Clinic; Mayo Clinic; Mayo Clinic; University of Iowa	2020	10.3389/fimmu.2020.573079	Recent studies have shown that a number of common autoimmune diseases have perturbations of their intestinal microbiome (dysbiosis). These include: Celiac Disease (CeD), Multiple Sclerosis (MS), Rheumatoid Arthritis (RA), Sjogren's Syndrome (SS), and Type 1 diabetes (T1D). All of these have intestinal microbiomes that are different from healthy controls. There have been numerous studies using ani…
385	Dourado, E; Ferro, M; Guerreiro, CS; Fonseca, JE	Diet as a Modulator of Intestinal Microbiota in Rheumatoid Arthritis	NUTRIENTS	Review	Universidade de Lisboa; Universidade de Lisboa; Universidade de Lisboa	2020	10.3390/nu12113504	Rheumatoid arthritis (RA) is a chronic immune-driven inflammatory disease characterised by synovial inflammation, leading to progressive cartilage and bone destruction, impacting patients' functional capacity and quality of life. Patients with RA have significant differences in gut microbiota composition when compared to controls. Intestinal dysbiosis influences the intestinal barrier strength, i…
386	Zaragoza-Garcia, O; Castro-Alarcon, N; Perez-Rubio, G; Guzman-Guzman, IP	DMARDs-Gut Microbiota Feedback: Implications in the Response to Therapy	BIOMOLECULES	Review		2020	10.3390/biom10111479	Due to its immunomodulatory effects and the limitation in the radiological damage progression, disease-modifying antirheumatic drugs (DMARDs) work as first-line rheumatoid arthritis (RA) treatment. In recent years, numerous research projects have suggested that the metabolism of DMARDs could have a role in gut dysbiosis, which indicates that the microbiota variability could modify the employment …
387	Vural, M; Gilbert, B; Ustun, I; Caglar, S; Finckh, A	Mini-Review: Human Microbiome and Rheumatic Diseases	FRONTIERS IN CELLULAR AND INFECTION MICROBIOLOGY	Review	Bakirkoy Dr. Sadi Konuk Research & Training Hospital; University of Health Sciences Turkey; University of Geneva	2020	10.3389/fcimb.2020.491160	Rheumatoid arthritis and spondyloarthropathy are the most common inflammatory rheumatic diseases. As the human microbiome is involved in the immune homeostasis, it has the potential to be a key factor in the development of autoimmune diseases and rheumatic diseases. In this article, we review the role of various human microbiota on the pathogenesis of rheumatic diseases, focusing on spondylarthri…
388	Yao, Y; Cai, XY; Fei, WD; Ren, FJ; Wang, FM; Luan, XF; Chen, FY; Zheng, CH	Regulating Gut Microbiome: Therapeutic Strategy for Rheumatoid Arthritis During Pregnancy and Lactation	FRONTIERS IN PHARMACOLOGY	Review	Zhejiang University	2020	10.3389/fphar.2020.594042	Rheumatoid arthritis (RA) is an autoimmune disease characterized by synovial inflammation and bone destruction. Microbial infection is considered to be the most important inducement of RA. The pregnancy planning of women in childbearing age is seriously affected by the disease activity of RA. Gut microbiome, related to immunity and inflammatory response of the host. At present, emerging evidence …
389	Wu, WJH; Zegarra-Ruiz, DF; Diehl, GE	Intestinal Microbes in Autoimmune and Inflammatory Disease	FRONTIERS IN IMMUNOLOGY	Review	Baylor College of Medicine; Memorial Sloan Kettering Cancer Center	2020	10.3389/fimmu.2020.597966	Autoimmune diseases and chronic inflammatory disorders are characterized by dysregulated immune responses resulting in excessive and uncontrolled tissue inflammation. Multiple factors including genetic variation, environmental stimuli, and infection are all thought to contribute to continued inflammation and pathology. Current evidence supports the microbiota as one such factor with emerging data…
390	Caslin, B; Mohler, K; Thiagarajan, S; Melamed, E	Alcohol as friend or foe in autoimmune diseases: a role for gut microbiome?	GUT MICROBES	Review	University of Texas System; University of Texas Austin	2021	10.1080/19490976.2021.1916278	Alcohol is well known for promoting systemic inflammation and aggravating multiple chronic health conditions. Thus, alcohol may also be expected to serve as a risk factor in autoimmune diseases. However, emerging data from human and animal studies suggest that alcohol may in fact be protective in autoimmune diseases. These studies point toward alcohol's complex dose-dependent relationship in auto…
391	Ashrafi, M; Kuhn, KA; Weisman, MH	The arthritis connection to inflammatory bowel disease (IBD): why has it taken so long to understand it?	RMD OPEN	Review	Shahid Beheshti University Medical Sciences; University of Colorado System; University of Colorado Anschutz Medical Campus; Stanford University	2021	10.1136/rmdopen-2020-001558	Inflammatory bowel disease (IBD) associated arthritis is a subgroup of spondyloarthritis (SpA) that has suffered from lack of recognition in rheumatology clinical and research circles for over 100 years. Although clinically distinguishable from rheumatoid arthritis and ankylosing spondylitis, it took advances in detection systems in the middle of the last century (rheumatoid factor, HLA-B27) to c…
392	Alpizar-Rodriguez, D; Finckh, A; Gilbert, B	The Role of Nutritional Factors and Intestinal Microbiota in Rheumatoid Arthritis Development	NUTRIENTS	Review	University of Geneva	2021	10.3390/nu13010096	Evidence about the role of nutritional factors and microbiota in autoimmune diseases, and in rheumatoid arthritis (RA) in particular, has grown in recent years, however many controversies remain. The aim of this review is to summarize the role of nutrition and of the intestinal microbiota in the development of RA. We will focus on selected dietary patterns, individual foods and beverages that hav…
393	Chu, XJ; Cao, NW; Zhou, HY; Meng, X; Guo, B; Zhang, HY; Li, BZ	The oral and gut microbiome in rheumatoid arthritis patients: a systematic review	RHEUMATOLOGY	Review	Anhui Medical University; Anhui Medical University; Anhui Medical University; Anhui Medical University	2021	10.1093/rheumatology/keaa835	Background. Recently, researchers have proposed a possible relationship between RA and the microbiome of the oral cavity and gut. However, this relation has not been systematically established. Herein, we conducted a comprehensive review of the pertinent literature to describe this possible association. Methods. We systematically performed searches in databases, namely EMBASE, the Cochrane Librar…
394	Mendivil, CO	Dietary Fish, Fish Nutrients, and Immune Function: A Review	FRONTIERS IN NUTRITION	Review	Universidad de los Andes (Colombia)	2021	10.3389/fnut.2020.617652	Dietary habits have a major impact on the development and function of the immune system. This impact is mediated both by the intrinsic nutritional and biochemical qualities of the diet, and by its influence on the intestinal microbiota. Fish as a food is rich in compounds with immunoregulatory properties, among them omega-3 fatty acids, melatonin, tryptophan, taurine and polyamines. In addition, …
395	Direito, R; Rocha, J; Sepodes, B; Eduardo-Figueira, M	Phenolic Compounds Impact on Rheumatoid Arthritis, Inflammatory Bowel Disease and Microbiota Modulation	PHARMACEUTICS	Review	Universidade de Lisboa; Universidade de Lisboa; Universidade de Lisboa	2021	10.3390/pharmaceutics13020145	Non-communicable chronic diseases (NCDs) are nowadays the principal cause of death, especially in most industrialized nations. These illnesses have increased exponentially with the consumption of diets very high in fat and sugar, not to mention stress and physical inactivity among other factors. The potential impact of suboptimal diets on NCDs' morbidity and mortality rates brings to the forefron…
396	Harper, A; Vijayakumar, V; Ouwehand, AC; ter Haar, J; Obis, D; Espadaler, J; Binda, S; Desiraju, S; Day, R	Viral Infections, the Microbiome, and Probiotics	FRONTIERS IN CELLULAR AND INFECTION MICROBIOLOGY	Review	Danone Nutricia	2021	10.3389/fcimb.2020.596166	Viral infections continue to cause considerable morbidity and mortality around the world. Recent rises in these infections are likely due to complex and multifactorial external drivers, including climate change, the increased mobility of people and goods and rapid demographic change to name but a few. In parallel with these external factors, we are gaining a better understanding of the internal f…
397	Chen, L; Cao, SQ; Lin, ZM; He, SJ; Zuo, JP	NOD-like receptors in autoimmune diseases	ACTA PHARMACOLOGICA SINICA	Review	Chinese Academy of Sciences; Shanghai Institute of Materia Medica, CAS; Chinese Academy of Sciences; University of Chinese Academy of Sciences, CAS; Shanghai University of Traditional Chinese Medicine	2021	10.1038/s41401-020-00603-2	Autoimmune diseases are chronic immune diseases characterized by dysregulation of immune system, which ultimately results in a disruption in self-antigen tolerance. Cumulative data show that nucleotide-binding and oligomerization domain (NOD)-like receptors (NLRs) play essential roles in various autoimmune diseases, such as inflammatory bowel disease (IBD), rheumatoid arthritis (RA), systemic lup…
398	Brandl, C; Bucci, L; Schett, G; Zaiss, MM	Crossing the barriers: Revisiting the gut feeling in rheumatoid arthritis	EUROPEAN JOURNAL OF IMMUNOLOGY	Review	University of Erlangen Nuremberg; University of Erlangen Nuremberg; University of Erlangen Nuremberg; Universita della Campania Vanvitelli	2021	10.1002/eji.202048876	To avoid autoimmunity, it is essential to keep the balance between the defence against pathogens and the maintenance of tolerance to self-antigens. Mucosal inflammation may lead to breakdown of tolerance and activation of autoreactive cells. Growing evidence suggests a major contribution of gut microbiota to the onset of chronic, autoimmune inflammatory diseases including rheumatoid arthritis (RA…
399	Rondanelli, M; Perdoni, F; Peroni, G; Caporali, R; Gasparri, C; Riva, A; Petrangolini, G; Faliva, MA; Infantino, V; Naso, M; Perna, S; Rigon, C	Ideal food pyramid for patients with rheumatoid arthritis: A narrative review	CLINICAL NUTRITION	Review	IRCCS Fondazione Casimiro Mondino; University of Pavia; University of Pavia; University of Milan; ASST Gaetano Pini CTO; University of Bahrain	2021	10.1016/j.clnu.2020.08.020	Emerging literature suggests that diet plays an important modulatory role in rheumatoid arthritis (RA) because diet is an environmental factor that affects inflammation, antigen presentation, antioxidant defense mechanisms and gut microbiota. Patients with RA frequently ask their doctors about which diets to follow, and even in the absence of advice from their physicians, many patients are undert…
400	Cassotta, M; Forbes-Hernandez, TY; Cianciosi, D; Zabaleta, ME; Cano, SS; Dominguez, I; Bullon, B; Regolo, L; Alvarez-Suarez, JM; Giampieri, F; Battino, M	Nutrition and Rheumatoid Arthritis in the 'Omics' Era	NUTRIENTS	Review	Universidade de Vigo; Marche Polytechnic University; University of Sevilla; Universidad de Las Americas - Ecuador; King Abdulaziz University; King Abdulaziz University; Jiangsu University	2021	10.3390/nu13030763	Modern high-throughput 'omics' science tools (including genomics, transcriptomics, proteomics, metabolomics and microbiomics) are currently being applied to nutritional sciences to unravel the fundamental processes of health effects ascribed to particular nutrients in humans and to contribute to more precise nutritional advice. Diet and food components are key environmental factors that interact …
401	Khor, B; Snow, M; Herrman, E; Ray, N; Mansukhani, K; Patel, KA; Said-Al-Naief, N; Maier, T; Machida, CA	Interconnections between the Oral and Gut Microbiomes: Reversal of Microbial Dysbiosis and the Balance between Systemic Health and Disease	MICROORGANISMS	Review	Oregon Health & Science University; Oregon Health & Science University	2021	10.3390/microorganisms9030496	The human microbiota represents a complex array of microbial species that influence the balance between the health and pathology of their surrounding environment. These microorganisms impart important biological benefits to their host, such as immune regulation and resistance to pathogen colonization. Dysbiosis of microbial communities in the gut and mouth precede many oral and systemic diseases …
402	Zaiss, MM; Wu, HJJ; Mauro, D; Schett, G; Ciccia, F	The gut-joint axis in rheumatoid arthritis	NATURE REVIEWS RHEUMATOLOGY	Review	University of Erlangen Nuremberg; University of Erlangen Nuremberg; University of Erlangen Nuremberg; University of Arizona; Universita della Campania Vanvitelli	2021	10.1038/s41584-021-00585-3	Intestinal dysbiosis is thought to be involved in the early stages of rheumatoid arthritis (RA). In this Review, the authors discuss the gut-joint axis in RA and the potentially pathogenic role of gut-derived immune cells in the joints. Rheumatoid arthritis (RA) is a chronic autoimmune inflammatory disorder that primarily affects the joints. One hypothesis for the pathogenesis of RA is that disea…
403	Yang, WJ; Cong, YZ	Gut microbiota-derived metabolites in the regulation of host immune responses and immune-related inflammatory diseases	CELLULAR & MOLECULAR IMMUNOLOGY	Review	University of Texas System; University of Texas Medical Branch Galveston; University of Texas System; University of Texas Medical Branch Galveston	2021	10.1038/s41423-021-00661-4	The gut microbiota has a critical role in the maintenance of immune homeostasis. Alterations in the intestinal microbiota and gut microbiota-derived metabolites have been recognized in many immune-related inflammatory disorders. These metabolites can be produced by gut microbiota from dietary components or by the host and can be modified by gut bacteria or synthesized de novo by gut bacteria. Gut…
404	Zouali, M	B lymphocytes, the gastrointestinal tract and autoimmunity	AUTOIMMUNITY REVIEWS	Review	China Medical University Taiwan	2021	10.1016/j.autrev.2021.102777	Under homeostatic conditions, bidirectional interactions between the gastrointestinal and the immune system allow production of both inflammatory and anti-inflammatory responses designed to prevent undesirable inflammation and to respond efficiently to potential insults. This balanced regulation can be disrupted in disorders that affect tissues remote to the gastrointestinal tract, as seen in aut…
405	Akdis, CA	Does the epithelial barrier hypothesis explain the increase in allergy, autoimmunity and other chronic conditions?	NATURE REVIEWS IMMUNOLOGY	Review	Swiss Institute of Allergy & Asthma Research; University of Zurich	2021	10.1038/s41577-021-00538-7	In this review, Cezmi Akdis discusses how epithelial barrier-damaging agents linked to industrialization, urbanization and modern life may explain the increased prevalence of allergic disease as well as a wide range of autoimmune and metabolic conditions in which immune responses to translocated bacteria have systemic effects. There has been a steep increase in allergic and autoimmune diseases, r…
406	Petrovska, N; Prajzlerova, K; Vencovsky, J; Senolt, L; Filkova, M	The pre-clinical phase of rheumatoid arthritis: From risk factors to prevention of arthritis	AUTOIMMUNITY REVIEWS	Review	Charles University Prague; Institute of Rheumatology; Charles University Prague	2021	10.1016/j.autrev.2021.102797	Rheumatoid arthritis (RA) is a chronic autoimmune disease considered as a multistep process spanning from the interaction of genetic (e.g., shared epitope or non-HLA loci), environmental and behavioral risk factors (e.g., smoking) leading to breaking immune tolerance and autoimmune processes such as the production of autoantibodies (e.g., antibodies against citrullinated proteins ACPA or rheumato…
407	Lu, HF; Yao, YJ; Yang, JZ; Zhang, H; Li, LJ	Microbiome-miRNA interactions in the progress from undifferentiated arthritis to rheumatoid arthritis: evidence, hypotheses, and opportunities	RHEUMATOLOGY INTERNATIONAL	Review	Collaborative Innovation Center for Diagnosis & Treatment of Infectious Diseases; Zhejiang University	2021	10.1007/s00296-021-04798-3	The human microbiome has attracted attention for its potential utility in precision medicine. Increasingly, more researchers are recognizing changes in intestinal microbiome can upset the balance between pro- and anti-inflammatory factors of host immune system, potentially contributing to arthritis immunopathogenesis. Patients who develop rheumatoid arthritis from undifferentiated arthritis can f…
408	Li, R; Boer, CG; Oei, L; Medina-Gomez, C	The Gut Microbiome: a New Frontier in Musculoskeletal Research	CURRENT OSTEOPOROSIS REPORTS	Review	Erasmus University Rotterdam; Erasmus MC; Erasmus University Rotterdam; Erasmus MC; Leiden University; Leiden University Medical Center (LUMC); Leiden University - Excl LUMC	2021	10.1007/s11914-021-00675-x	Purpose of the review The human gut harbors a complex community of microbes that influence many processes regulating musculoskeletal development and homeostasis. This review gives an update on the current knowledge surrounding the impact of the gut microbiota on musculoskeletal health, with an emphasis on research conducted over the last three years. Recent findings The gut microbiota and their m…
409	Kinashi, Y; Hase, K	Partners in Leaky Gut Syndrome: Intestinal Dysbiosis and Autoimmunity	FRONTIERS IN IMMUNOLOGY	Review	Keio University; Keio University; University of Tokyo	2021	10.3389/fimmu.2021.673708	The intestinal surface is constitutively exposed to diverse antigens, such as food antigens, food-borne pathogens, and commensal microbes. Intestinal epithelial cells have developed unique barrier functions that prevent the translocation of potentially hostile antigens into the body. Disruption of the epithelial barrier increases intestinal permeability, resulting in leaky gut syndrome (LGS). Cli…
410	Paul, AK; Paul, A; Jahan, R; Jannat, K; Bondhon, TA; Hasan, A; Nissapatorn, V; Pereira, ML; Wilairatana, P; Rahmatullah, M	Probiotics and Amelioration of Rheumatoid Arthritis: Significant Roles of Lactobacillus casei and Lactobacillus acidophilus	MICROORGANISMS	Review	Walailak University; Walailak University; Universidade de Aveiro; Universidade de Aveiro; Mahidol University	2021	10.3390/microorganisms9051070	Rheumatoid arthritis is a chronic autoimmune disorder that can lead to disability conditions with swollen joints, pain, stiffness, cartilage degradation, and osteoporosis. Genetic, epigenetic, sex-specific factors, smoking, air pollution, food, oral hygiene, periodontitis, Prevotella, and imbalance in the gastrointestinal microbiota are possible sources of the initiation or progression of rheumat…
411	Askari, G; Ghavami, A; Shahdadian, F; Moravejolahkami, AR	Effect of synbiotics and probiotics supplementation on autoimmune diseases: A systematic review and meta-analysis of clinical trials*	CLINICAL NUTRITION	Review	Isfahan University Medical Science; Isfahan University Medical Science; Isfahan University Medical Science	2021	10.1016/j.clnu.2021.02.015	Background & aims: Today synbiotics are considered as immunomodulatory agents. The current systematic review and meta-analysis investigated the effect of synbiotics and probiotics on inflammatory and oxidative stress markers in autoimmune disease. Materials & methods: The English literature search was performed using PubMed, Scopus, Web of Science, and the Central Cochrane Library through March 2…
412	Hannachi, N; Camoin-Jau, L	Drug Response Diversity: A Hidden Bacterium?	JOURNAL OF PERSONALIZED MEDICINE	Review	Institut de Recherche pour le Developpement (IRD); UDICE-French Research Universities; Aix-Marseille Universite; Assistance Publique-Hopitaux de Marseille; Universite Ferhat Abbas Setif; UDICE-French Research Universities; Aix-Marseille Universite; Assistance Publique-Hopitaux de Marseille	2021	10.3390/jpm11050345	Interindividual heterogeneity in response to treatment is a real public health problem. It is a factor that can be responsible not only for ineffectiveness or fatal toxicity but also for hospitalization due to iatrogenic effects, thus increasing the cost of patient care. Several research teams have been interested in what may be at the origin of these phenomena, particularly at the genetic level …
413	Botia-Sanchez, M; Alarcon-Riquelme, ME; Galicia, G	B Cells and Microbiota in Autoimmunity	INTERNATIONAL JOURNAL OF MOLECULAR SCIENCES	Review	Pfizer; University of Granada; Karolinska Institutet	2021	10.3390/ijms22094846	Trillions of microorganisms inhabit the mucosal membranes maintaining a symbiotic relationship with the host's immune system. B cells are key players in this relationship because activated and differentiated B cells produce secretory immunoglobulin A (sIgA), which binds commensals to preserve a healthy microbial ecosystem. Mounting evidence shows that changes in the function and composition of th…
414	Xin, PL; Jie, LF; Cheng, Q; Bin, DY; Dan, CW	Pathogenesis and Function of Interleukin-35 in Rheumatoid Arthritis	FRONTIERS IN PHARMACOLOGY	Review	Anhui Medical University; Anhui Medical University; Anhui Medical University; Anhui Medical University	2021	10.3389/fphar.2021.655114	It is well known that RA (Rheumatoid arthritis) is an autoimmune disease characterized by multiple and symmetric arthropathy. The main pathological features of RA are synovial hyperplasia, angiogenesis, pannus formation, inflammatory cell infiltration, articular cartilage, bone destruction, and ultimately joint dysfunction, even deformity. IL-35 (Interleukin-35) is a new member of the IL-12 (Inte…
415	Drury, B; Hardisty, G; Gray, RD; Ho, GT	Neutrophil Extracellular Traps in Inflammatory Bowel Disease: Pathogenic Mechanisms and Clinical Translation	CELLULAR AND MOLECULAR GASTROENTEROLOGY AND HEPATOLOGY	Review	University of Edinburgh	2021	10.1016/j.jcmgh.2021.03.002	The Inflammatory Bowel Diseases (IBD), Ulcerative Colitis (UC) and Crohn's Disease (CD) are characterised by chronic non-resolving gut mucosal inflammation involving innate and adaptive immune responses. Neutrophils, usually regarded as first responders in inflammation, are a key presence in the gut mucosal inflammatory milieu in IBD. Here, we review the role of neutrophil extracellular trap (NET…
416	Huang, DN; Wu, FF; Zhang, AH; Sun, H; Wang, XJ	Efficacy of berberine in treatment of rheumatoid arthritis: From multiple targets to therapeutic potential	PHARMACOLOGICAL RESEARCH	Review	Heilongjiang University of Chinese Medicine	2021	10.1016/j.phrs.2021.105667	Rheumatoid arthritis is a systemic autoimmune disorder involved in persistent synovial inflammation. Berberine is a nature-derived alkaloid compound with multiple pharmacological activities in different pathologies, including RA. Recent experimental studies have clarified several determinant cellular and molecular targets of BBR in RA, and provided novel evidence supporting the promising therapeu…
417	Cohen, I; Ruff, WE; Longbrake, EE	Influence of immunomodulatory drugs on the gut microbiota	TRANSLATIONAL RESEARCH	Review	Yale University	2021	10.1016/j.trsl.2021.01.009	Immunomodulatory medications are a mainstay of treatment for autoimmune diseases and malignancies. In addition to their direct effects on immune cells, these medications also impact the gut microbiota. Drug-induced shifts in commensal microbes can lead to indirect but important changes in the immune response. We performed a comprehensive literature search focusing on immunotherapy/microbe interac…
418	Li, MX; Wang, F	Role of Intestinal Microbiota on Gut Homeostasis and Rheumatoid Arthritis	JOURNAL OF IMMUNOLOGY RESEARCH	Review	Tianjin University Science & Technology	2021	10.1155/2021/8167283	Rheumatoid arthritis (RA) is a chronic inflammatory disease that is immune mediated. Patients typically present with synovial inflammation, which gradually deteriorates to investigate severe cartilage and bone damage, affecting an individual's ability to perform basic tasks and impairing the quality of life. When evaluated against healthy controls, patients with RA have notable variations within …
419	Novella-Navarro, M; Plasencia-Rodriguez, C; Nuno, L; Balsa, A	Risk Factors for Developing Rheumatoid Arthritis in Patients With Undifferentiated Arthritis and Inflammatory Arthralgia	FRONTIERS IN MEDICINE	Review	Hospital Universitario La Paz	2021	10.3389/fmed.2021.668898	Currently, there is an increasing interest in treating patients at risk of rheumatoid arthritis (RA) to prevent the development of this chronic disease. In this sense, research has focused attention on the early identification of predictive factors of this disease. Autoantibodies and markers of systemic inflammation can be present before clinical arthritis and RA development. So, the phase of inf…
420	Ferro, M; Charneca, S; Dourado, E; Guerreiro, CS; Fonseca, JE	Probiotic Supplementation for Rheumatoid Arthritis: A Promising Adjuvant Therapy in the Gut Microbiome Era	FRONTIERS IN PHARMACOLOGY	Review	Universidade de Lisboa; Universidade de Lisboa; Universidade de Lisboa	2021	10.3389/fphar.2021.711788	Rheumatoid arthritis (RA) is a chronic immune-mediated inflammatory disease that ultimately leads to joint destruction and functional disability. Although the exact etiology of RA is not fully understood, it is well established that gut microbiota (GM) plays a vital role in the pathogenesis of RA, with accumulating evidence suggesting that gut dysbiosis induces a chronic inflammatory response tha…
421	Aarts, J; Boleij, A; Pieters, BCH; Feitsma, AL; van Neerven, RJJ; ten Klooster, JP; M'Rabet, L; Arntz, OJ; Koenders, MI; van de Loo, FAJ	Flood Control: How Milk-Derived Extracellular Vesicles Can Help to Improve the Intestinal Barrier Function and Break the Gut-Joint Axis in Rheumatoid Arthritis	FRONTIERS IN IMMUNOLOGY	Review	Wageningen University & Research	2021	10.3389/fimmu.2021.703277	Many studies provided compelling evidence that extracellular vesicles (EVs) are involved in the regulation of the immune response, acting as both enhancers and dampeners of the immune system, depending on the source and type of vesicle. Research, including ours, has shown anti-inflammatory effects of milk-derived EVs, using human breast milk as well as bovine colostrum and store-bought pasteurize…
422	Chen, J; Xiong, AL; Ma, YH; Qin, CH; Ho, CL	Impact of the Host-Microbiome on Osteomyelitis Pathogenesis	FRONTIERS IN MOLECULAR BIOSCIENCES	Review	Southern University of Science & Technology	2021	10.3389/fmolb.2021.702484	The microbiome is a collection of genomes from microbiota, including all microorganisms in a niche, through direct and indirect interactions with the host. Certain microorganisms can exist in areas conventionally considered to be sterile, such as the bone matrix. Osseous microbiota dysbiosis caused by host-microbiome perturbation or external infections may ultimately lead to osteomyelitis, a bone…
423	Schupack, DA; Mars, RAT; Voelker, DH; Abeykoon, JP; Kashyap, PC	The promise of the gut microbiome as part of individualized treatment strategies	NATURE REVIEWS GASTROENTEROLOGY & HEPATOLOGY	Review	Mayo Clinic; Mayo Clinic; Mayo Clinic; Mayo Clinic	2022	10.1038/s41575-021-00499-1	Variability in disease presentation, progression and treatment response has been a central challenge in medicine. Although variability in host factors and genetics are important, it has become evident that the gut microbiome, with its vast genetic and metabolic diversity, must be considered in moving towards individualized treatment. In this Review, we discuss six broad disease groups: infectious…
424	Tsai, YW; Dong, JL; Jian, YJ; Fu, SH; Chien, MW; Liu, YW; Hsu, CY; Sytwu, HK	Gut Microbiota-Modulated Metabolomic Profiling Shapes the Etiology and Pathogenesis of Autoimmune Diseases	MICROORGANISMS	Review	Chang Gung Memorial Hospital; Chang Gung University; National Defense Medical Center; National Defense Medical Center; National Health Research Institutes - Taiwan; National Defense Medical Center; Academia Sinica - Taiwan	2021	10.3390/microorganisms9091930	Autoimmunity is a complex and multifaceted process that contributes to widespread functional decline that affects multiple organs and tissues. The pandemic of autoimmune diseases, which are a global health concern, augments in both the prevalence and incidence of autoimmune diseases, including type 1 diabetes, multiple sclerosis, and rheumatoid arthritis. The development of autoimmune diseases is…
425	Wagenaar, CA; van de Put, M; Bisschops, M; Walrabenstein, W; de Jonge, CS; Herrema, H; van Schaardenburg, D	The Effect of Dietary Interventions on Chronic Inflammatory Diseases in Relation to the Microbiome: A Systematic Review	NUTRIENTS	Review	Vrije Universiteit Amsterdam; University of Amsterdam; Academic Medical Center Amsterdam; University of Amsterdam; University of Amsterdam; Academic Medical Center Amsterdam	2021	10.3390/nu13093208	Chronic inflammation plays a central role in the pathophysiology of various non-communicable diseases. Dietary interventions can reduce inflammation, in part due to their effect on the gut microbiome. This systematic review aims to determine the effect of dietary interventions, specifically fiber intake, on chronic inflammatory diseases and the microbiome. It aims to form hypotheses on the potent…
426	Vijay, A; Valdes, AM	Role of the gut microbiome in chronic diseases: a narrative review	EUROPEAN JOURNAL OF CLINICAL NUTRITION	Review	University of Nottingham; Nottingham University Hospital NHS Trust; University of Nottingham	2022	10.1038/s41430-021-00991-6
427	Calvet, X; Carpio, D; Rodriguez-Lago, I; Garcia-Vicuna, R; Barreiro-de-Acosta, M; Juanola, X; Aguas, M; Castillo, C; Gratacos, J	Risk of infection associated with Janus Kinase (JAK) inhibitors and biological therapies in inflammatory intestinal disease and rheumatoid arthritis. Prevention strategies	GASTROENTEROLOGIA Y HEPATOLOGIA	Review	Autonomous University of Barcelona; Parc Tauli Hospital Universitari; CIBER - Centro de Investigacion Biomedica en Red; CIBEREHD; Instituto de Salud Carlos III; Complexo Hospitalario Universitario de Pontevedra; Galdakao Hospital; Complexo Hospitalario Universitario de Santiago de Compostela; Institut d'Investigacio Biomedica de Bellvitge (IDIBELL); Bellvitge University Hospital; University of Ba…	2021		Patients with certain immune-mediated inflammatory diseases, such as rheumatoid arthritis (RA) and inflammatory bowel disease (IBD), have an increased risk of severe infectious diseases than the general population, which are mainly associated with the immunosuppressive treatments that they receive. These treatments act on the immune system through different mechanisms, causing different degrees o…
428	Bungau, SG; Behl, T; Singh, A; Sehgal, A; Singh, S; Chigurupati, S; Vijayabalan, S; Das, S; Palanimuthu, VR	Targeting Probiotics in Rheumatoid Arthritis	NUTRIENTS	Review	University of Oradea; University of Oradea; Chitkara University, Punjab; Qassim University; Taylor's University; AIMST University; JSS Academy of Higher Education & Research; JSS College of Pharmacy, Ooty	2021	10.3390/nu13103376	Rheumatoid arthritis (RA) is a progressive inflammatory disorder characterized by swollen joints, discomfort, tightness, bone degeneration and frailty. Genetic, agamogenetic and sex-specific variables, Prevotella, diet, oral health and gut microbiota imbalance are all likely causes of the onset or development of RA, perhaps the specific pathways remain unknown. Lactobacillus spp. probiotics are o…
429	Sedghi, L; DiMassa, V; Harrington, A; Lynch, SV; Kapila, YL	The oral microbiome: Role of key organisms and complex networks in oral health and disease	PERIODONTOLOGY 2000	Review	University of California System; University of California San Francisco; University of California System; University of California San Francisco	2021	10.1111/prd.12393
430	Cheng, YX; Zhao, YH; Zheng, Y	Therapeutic potential of triptolide in autoimmune diseases and strategies to reduce its toxicity	CHINESE MEDICINE	Review	University of Macau; University of Macau	2021	10.1186/s13020-021-00525-z	With the increasing epidemiology of autoimmune disease worldwide, there is an urgent need for effective drugs with low cost in clinical treatment. Triptolide, the most potent bioactive compound from traditional Chinese herb Tripterygium Wilfordii Hook F, possesses immunosuppression and anti-inflammatory activity. It is a potential drug for the treatment of various autoimmune diseases, but its cli…
431	Yan, HH; Su, R; Xue, HW; Gao, C; Li, XF; Wang, CH	Pharmacomicrobiology of Methotrexate in Rheumatoid Arthritis: Gut Microbiome as Predictor of Therapeutic Response	FRONTIERS IN IMMUNOLOGY	Review	Shanxi Medical University; Harvard University; Boston Children's Hospital; Brigham & Women's Hospital; Harvard Medical School	2021	10.3389/fimmu.2021.789334	Rheumatoid arthritis (RA) is a disabling autoimmune disease with invasive arthritis as the main manifestation and synovitis as the basic pathological change, which can cause progressive destruction of articular cartilage and bone, ultimately leading to joint deformity and loss of function. Since its introduction in the 1980s and its widespread use in the treatment of RA, low-dose methotrexate (MT…
432	You, K; Yang, LJ; Shen, J; Liu, B; Guo, YQ; Chen, T; Li, GW; Lu, H	Relationship between Gut Microbiota and Bone Health	MINI-REVIEWS IN MEDICINAL CHEMISTRY	Review	Sun Yat Sen University	2022	10.2174/1389557522666220304230920	Gut Microbiota (GM) are microorganisms that live in the host gastrointestinal tract, and their abundance varies throughout the host's life. With the development of sequencing technology, the role of GM in various diseases has been increasingly elucidated. Unlike earlier studies on orthopedic diseases, this review elucidates the correlation between GM health and bone health and discusses the poten…
433	Piccioni, A; Cicchinelli, S; Valletta, F; De Luca, G; Longhitano, Y; Candelli, M; Ojetti, V; Sardeo, F; Navarra, S; Covino, M; Franceschi, F	Gut Microbiota and Autoimmune Diseases: A Charming Real World Together with Probiotics	CURRENT MEDICINAL CHEMISTRY	Review	Catholic University of the Sacred Heart; IRCCS Policlinico Gemelli; University of Genoa	2022	10.2174/0929867328666210922161913	Background: The role of gut microbiota in human disease is fascinating for hundreds of researchers worldwide. Many works have highlighted that gut microbiota modulates the immune system and that its disruption can trigger autoimmune and inflammatory immune-mediated diseases. Probiotics are able to positively modify microbiota composition. Objective: The aim of this review is to report the most im…
434	Bhardwaj, A; Sapra, L; Tiwari, A; Mishra, PK; Sharma, S; Srivastava, RK	Osteomicrobiology: The Nexus Between Bone and Bugs	FRONTIERS IN MICROBIOLOGY	Review	All India Institute of Medical Sciences (AIIMS) New Delhi; Indian Institute of Technology System (IIT System); Indian Institute of Technology (IIT) - Delhi; Indian Institute of Technology (IIT) - Madras; Indian Council of Medical Research (ICMR); ICMR - National Institute for Research in Environmental Health (NIREH)	2022	10.3389/fmicb.2021.812466	A growing body of scientific evidence supports the notion that gut microbiota plays a key role in the regulation of various physiological and pathological processes related to human health. Recent findings have now established that gut microbiota also contributes to the regulation of bone homeostasis. Studies on animal models have unraveled various underlying mechanisms responsible for gut microb…
435	Wang, L; Cao, ZM; Zhang, LL; Dai, XC; Liu, ZJ; Zeng, YX; Li, XY; Wu, QJ; Lv, WL	Helicobacter Pylori and Autoimmune Diseases: Involving Multiple Systems	FRONTIERS IN IMMUNOLOGY	Review	China Academy of Chinese Medical Sciences; Guang'anmen Hospital, CACMS; China Academy of Chinese Medical Sciences; Guang'anmen Hospital, CACMS; China Academy of Chinese Medical Sciences; Guang'anmen Hospital, CACMS	2022	10.3389/fimmu.2022.833424	The modern Gastroenterology have witnessed an essential stride since Helicobacter pylori was first found in the stomach and then its pathogenic effect was discovered. According to the researches conducted during the nearly 40 years, it has been found that this bacterium is associated with a natural history of many upper gastrointestinal diseases. Epidemiological data show an increased incidence o…
436	Zorgetto-Pinheiro, VA; Machate, DJ; Figueiredo, PS; Marcelino, G; Hiane, PA; Pott, A; Guimaraes, RDA; Bogo, D	Omega-3 Fatty Acids and Balanced Gut Microbiota on Chronic Inflammatory Diseases: A Close Look at Ulcerative Colitis and Rheumatoid Arthritis Pathogenesis	JOURNAL OF MEDICINAL FOOD	Review	Universidade Federal de Mato Grosso; Universidade Federal de Mato Grosso; Universidade Federal de Mato Grosso	2022	10.1089/jmf.2021.0012	The aim of this article was to review experimental and clinical studies regarding the use of omega-3 fatty acids on the prevention and control of chronic inflammatory diseases with autoimmune background through the gut microbiota modulation. For this, natural omega-3 sources are presented emphasizing the importance of a healthy diet for the body's homeostasis and the enzymatic processes that thes…
437	Wang, DW; Pang, XT; Zhang, H; Gao, HX; Leng, YF; Chen, FQ; Zhang, R; Feng, Y; Sun, ZL	Gut microbial dysbiosis in rheumatoid arthritis: a systematic review protocol of case-control studies	BMJ OPEN	Review	Nanjing University of Chinese Medicine; Shanghai Jiao Tong University	2022	10.1136/bmjopen-2021-052021	Introduction Rheumatoid arthritis (RA) has a huge societal impact due to the high prevalence, irreversible joint damage and systemic complications. Gut microbiota plays an important role in the pathogenesis and progression of RA by regulating the host immune system. Restoring intestinal homeostasis by altering the microbiota could be an attractive strategy for the prevention and treatment of RA. …
438	Garabatos, N; Santamaria, P	Gut Microbial Antigenic Mimicry in Autoimmunity	FRONTIERS IN IMMUNOLOGY	Review	University of Barcelona; Hospital Clinic de Barcelona; IDIBAPS; University of Calgary; University of Calgary	2022	10.3389/fimmu.2022.873607	The gut microbiota plays a major role in the developmental biology and homeostasis of cells belonging to the adaptive and innate arms of the immune system. Alterations in its composition, which are known to be regulated by both genetic and environmental factors, can either promote or suppress the pathogenic processes underlying the development of various autoimmune diseases, including inflammator…
439	Chen, Y; Wang, X; Zhang, CL; Liu, ZY; Li, C; Ren, ZG	Gut Microbiota and Bone Diseases: A Growing Partnership	FRONTIERS IN MICROBIOLOGY	Review	Zhengzhou University; Zhengzhou University; Zhengzhou University; Zhengzhou University	2022	10.3389/fmicb.2022.877776	Gut microbiota is key to human health and disease. Convincing studies have demonstrated that dysbiosis in the commensal gut microbiota is associated with intestinal and extra-intestinal diseases. Recent explorations have significantly contributed to the understanding of the relationship between gut microbiota and bone diseases (osteoporosis, osteoarthritis, rheumatoid arthritis, and bone cancer).…
440	Wang, YL; Wei, J; Zhang, WY; Doherty, M; Zhang, YQ; Xie, HB; Li, W; Wang, N; Lei, GH; Zeng, C	Gut dysbiosis in rheumatic diseases: A systematic review and meta-analysis of 92 observational studies	EBIOMEDICINE	Review	Central South University; Central South University; University of Nottingham; Harvard University; Harvard Medical School; Massachusetts General Hospital; Harvard University; Harvard Medical School; Massachusetts General Hospital; Central South University	2022	10.1016/j.ebiom.2022.104055	Background Emerging evidence suggests that dysbiosis in gut microbiota may contribute to the occurrence or devel-opment of several rheumatic diseases. Since gut microbiota dysbiosis is potentially modifiable, it has been postulated to be a promising preventive or therapeutic target for rheumatic diseases. However, the current understanding on the potential associations between gut microbiota and …
441	Shaheen, WA; Quraishi, MN; Iqbal, TH	Gut microbiome and autoimmune disorders	CLINICAL AND EXPERIMENTAL IMMUNOLOGY	Review	University of Birmingham; University of Birmingham; Egyptian Knowledge Bank (EKB); Menofia University; University of Birmingham; University of Birmingham	2022	10.1093/cei/uxac057	Autoimmune diseases have long been known to share a common pathogenesis involving a dysregulated immune system with a failure to recognize self from non-self-antigens. This immune dysregulation is now increasingly understood to be induced by environmental triggers in genetically predisposed individuals. Although several external environmental triggers have been defined in different autoimmune dis…
442	Li, JS; Su, SL; Xu, Z; Zhao, LH; Fan, RY; Guo, JM; Qian, DW; Duan, JA	Potential roles of gut microbiota and microbial metabolites in chronic inflammatory pain and the mechanisms of therapy drugs	THERAPEUTIC ADVANCES IN CHRONIC DISEASE	Review	Nanjing University of Chinese Medicine; Nanjing University of Chinese Medicine	2022	10.1177/20406223221091177	Observational findings achieved that gut microbes mediate human metabolic health and disease risk. The types of intestinal microorganisms depend on the intake of food and drugs and are also related to their metabolic level and genetic factors. Recent studies have shown that chronic inflammatory pain is closely related to intestinal microbial homeostasis. Compared with the normal intestinal flora,…
443	Attur, M; Scher, JU; Abramson, SB; Attur, M	Role of Intestinal Dysbiosis and Nutrition in Rheumatoid Arthritis	CELLS	Review	Drexel University; NYU Langone Medical Center	2022	10.3390/cells11152436	Rheumatoid arthritis is a chronic systemic immune-mediated disease caused by genetic and environmental factors. It is often characterized by the generation of autoantibodies that lead to synovial inflammation and eventual multi-joint destruction. A growing number of studies have shown significant differences in the gut microbiota composition of rheumatoid arthritis (RA) patients compared to healt…
444	Ma, X; Nan, F; Liang, HT; Shu, PY; Fan, XZ; Song, XS; Hou, YF; Zhang, DF	Excessive intake of sugar: An accomplice of inflammation	FRONTIERS IN IMMUNOLOGY	Review	Sichuan University; Sichuan University; Shandong First Medical University & Shandong Academy of Medical Sciences; Shandong First Medical University & Shandong Academy of Medical Sciences	2022	10.3389/fimmu.2022.988481	High sugar intake has long been recognized as a potential environmental risk factor for increased incidence of many non-communicable diseases, including obesity, cardiovascular disease, metabolic syndrome, and type 2 diabetes (T2D). Dietary sugars are mainly hexoses, including glucose, fructose, sucrose and High Fructose Corn Syrup (HFCS). These sugars are primarily absorbed in the gut as fructos…
445	Belvoncikova, P; Maronek, M; Gardlik, R	Gut Dysbiosis and Fecal Microbiota Transplantation in Autoimmune Diseases	INTERNATIONAL JOURNAL OF MOLECULAR SCIENCES	Review	Comenius University Bratislava	2022	10.3390/ijms231810729	Gut microbiota dysbiosis has recently been reported in a number of clinical states, including neurological, psychiatric, cardiovascular, metabolic and autoimmune disorders. Yet, it is not completely understood how colonizing microorganisms are implicated in their pathophysiology and molecular pathways. There are a number of suggested mechanisms of how gut microbiota dysbiosis triggers or sustains…
446	Li, BW; Yang, B; Liu, XM; Zhao, JX; Ross, RP; Stanton, C; Zhang, H; Chen, W	Microbiota-assisted therapy for systemic inflammatory arthritis: advances and mechanistic insights	CELLULAR AND MOLECULAR LIFE SCIENCES	Review	Jiangnan University; Jiangnan University; Jiangnan University; University College Cork; Teagasc; Jiangnan University; Beijing Technology & Business University	2022	10.1007/s00018-022-04498-6	Research on the influence of gut microbiota on systemic inflammatory arthritis has exploded in the past decade. Gut microbiota changes may be a crucial regulatory component in systemic inflammatory arthritis. As a result of advancements in the field, microbiota-assisted therapy has evolved, but this discipline is still in its infancy. Consequently, we review the limitations of current systemic in…
447	Zhao, T; Wei, YY; Zhu, YY; Xie, ZH; Hai, QS; Li, ZF; Qin, DD	Gut microbiota and rheumatoid arthritis: From pathogenesis to novel therapeutic opportunities	FRONTIERS IN IMMUNOLOGY	Review	Yunnan University of Chinese Medicine; Yunnan University of Chinese Medicine; Yunnan University of Chinese Medicine	2022	10.3389/fimmu.2022.1007165	Rheumatoid arthritis (RA) is a chronic autoimmune disease that primarily affects the joints. Microbial infection is considered a crucial inducer of RA. Alterations in the composition of intestinal bacteria in individuals with preclinical and established RA suggest a vital role of the gut microbiota in immune dysfunction characteristic of RA. However, the mechanisms by which gut dysbiosis contribu…
448	Zeng, LT; Deng, Y; He, Q; Yang, KL; Li, J; Xiang, W; Liu, HP; Zhu, XF; Chen, H	Safety and efficacy of probiotic supplementation in 8 types of inflammatory arthritis: A systematic review and meta-analysis of 34 randomized controlled trials	FRONTIERS IN IMMUNOLOGY	Review	Chinese Academy of Medical Sciences - Peking Union Medical College; Peking Union Medical College; Peking Union Medical College Hospital; Hunan University of Chinese Medicine; Fudan University	2022	10.3389/fimmu.2022.961325	ObjectiveTo evaluate Safety and efficacy of probiotic supplementation in inflammatory arthritis.MethodsThe literature on the treatment of inflammatory arthritis with probiotics has been collected in databases such as CNKI, Pubmed, Cochrane library, Embase, etc. The search time is for them to build the database until May 2022. The included literatures are randomized controlled trials (RCTs) of pro…
449	Ding, L; Chen, XQ; Cheng, HW; Zhang, TT; Li, Z	Advances in IgA glycosylation and its correlation with diseases	FRONTIERS IN CHEMISTRY	Review	Northwest University Xi'an	2022	10.3389/fchem.2022.974854	Immunoglobulin A (IgA) is the most abundant immunoglobulin synthesized in the human body. It has the highest concentration in the mucosa and is second only to IgG in serum. IgA plays an important role in mucosal immunity, and is the predominant antibody used to protect the mucosal surface from pathogens invasion and to maintain the homeostasis of intestinal flora. Moreover, The binding IgA to the…
450	Marin, GE; Neag, MA; Burlacu, CC; Buzoianu, AD	The Protective Effects of Nutraceutical Components in Methotrexate-Induced Toxicity Models-An Overview	MICROORGANISMS	Review	Iuliu Hatieganu University of Medicine & Pharmacy; Iuliu Hatieganu University of Medicine & Pharmacy	2022	10.3390/microorganisms10102053	There are multiple concerns associated with methotrexate (MTX), widely recognized for anti-neoplastic and anti-inflammatory effects in life-threatening disease conditions, i.e., acute lymphoblastic leukemia, non-Hodgkin's lymphoma, psoriasis, and rheumatoid arthritis, due to long-term side effects and associated toxicity, which limits its valuable potential. MTX acts as an inhibitor of dihydrofol…
451	Zemanova, N; Omelka, R; Mondockova, V; Kovacova, V; Martiniakova, M	Roles of Gut Microbiome in Bone Homeostasis and Its Relationship with Bone-Related Diseases	BIOLOGY-BASEL	Review	Constantine the Philosopher University in Nitra; Constantine the Philosopher University in Nitra	2022	10.3390/biology11101402	Simple Summary In recent years, there has been increasing evidence that communication between the skeletal system and the gut microbiome (GM) can influence bone health and that the GM is a key regulator of bone homeostasis. Here, we review the roles of GM in bone homeostasis. In addition, the relationship between GM composition and selected bone-related diseases (osteoporosis, osteoarthritis, rhe…
452	Xu, XY; Wang, M; Wang, ZK; Chen, Q; Chen, XX; Xu, YY; Dai, M; Wu, B; Li, YP	The bridge of the gut-joint axis: Gut microbial metabolites in rheumatoid arthritis	FRONTIERS IN IMMUNOLOGY	Review	Chongqing Medical University	2022	10.3389/fimmu.2022.1007610	Rheumatoid arthritis (RA) is an autoimmune disease characterized by joint destruction, synovitis, and pannus formation. Gut microbiota dysbiosis may exert direct pathogenic effects on gut homeostasis. It may trigger the host's innate immune system and activate the gut-joint axis, which exacerbates the RA. However, although the importance of the gut microbiota in the development and progression of…
453	Opoku, YK; Asare, KK; Ghartey-Quansah, G; Afrifa, J; Bentsi-Enchill, F; Ofori, EG; Koomson, CK; Kumi-Manu, R	Intestinal microbiome-rheumatoid arthritis crosstalk: The therapeutic role of probiotics	FRONTIERS IN MICROBIOLOGY	Review	University of Cape Coast; University of Cape Coast	2022	10.3389/fmicb.2022.996031	Rheumatoid arthritis (RA) is a common systemic autoimmune disease with a global health importance. It is characterized by long-term complications, progressive disability and high mortality tied to increased social-economic pressures. RA has an inflammatory microenvironment as one of the major underlying factors together with other complex processes. Although mechanisms underlying the triggering o…
454	Keeney, KM; Yurist-Doutsch, S; Arrieta, MC; Finlay, BB	Effects of Antibiotics on Human Microbiota and Subsequent Disease	ANNUAL REVIEW OF MICROBIOLOGY, VOL 68	Review; Book Chapter	University of British Columbia; University of British Columbia; University of British Columbia	2014	10.1146/annurev-micro-091313-103456	Although antibiotics have significantly improved human health and life expectancy, their disruption of the existingmicrobiota has been linked to significant side effects such as antibiotic-associated diarrhea, pseudomembranous colitis, and increased susceptibility to subsequent disease. By using antibiotics to break colonization resistance against Clostridium, Salmonella, and Citrobacter species,…
455	Lochner, M; Wang, ZB; Sparwasser, T	The Special Relationship in the Development and Function of T Helper 17 and Regulatory T Cells	REGULATORY T CELLS IN HEALTH AND DISEASE	Review; Book Chapter	Helmholtz Association; Helmholtz-Center for Infection Research	2015	10.1016/bs.pmbts.2015.07.013	Thelper 17 (Th17) cells play an essential role in the clearance of extracellular pathogenic bacteria and fungi. However, this subset is critically involved in the pathology of many autoimmune diseases, e.g., psoriasis, multiple sclerosis, allergy, rheumatoid arthritis, and inflammatory bowel diseases in humans. Therefore, Th17 responses need to be tightly regulated in vivo to mediate effective ho…
456	Kageyama, T; Matsuo, T; Kurakake, R; Sano, T	Relationship between T cells and microbiota in health and disease	MICROBIOME IN HEALTH AND DISEASE	Review; Book Chapter	University of Illinois System; University of Illinois Chicago; University of Illinois Chicago Hospital	2020	10.1016/bs.pmbts.2020.03.007	In the past decades, the fields of microbiology and immunology have largely advanced by using germ-free animals and next-generation sequencing. Many studies revealed the relationship among gut microbiota, activation of immune system, and various diseases. Especially, some gut commensals can generate their antigen-specific T cells. It is becoming clear that commensal bacteria have important roles …
457	Kou, HY; Qing, Z; Guo, H; Zhang, R; Ma, JB	Effect of vitamin E supplementation in rheumatoid arthritis: a systematic review and meta-analysis	EUROPEAN JOURNAL OF CLINICAL NUTRITION	Review; Early Access	Shaanxi University of Chinese Medicine; Xi'an Jiaotong University; Xi'an Jiaotong University; Xi'an Jiaotong University		10.1038/s41430-022-01148-9	Objective The purpose of this study was to evaluate the safety and effectiveness of vitamin E in rheumatoid arthritis patients. Methods A computerized search of PubMed, Embase, The Cochrane Library, and Web of Science databases was conducted to find published randomized controlled trials of vitamin E in rheumatoid arthritis; the experimental group was treated with vitamin E, while the control gro…
458	Miyauchi, E; Shimokawa, C; Steimle, A; Desai, MS; Ohno, H	The impact of the gut microbiome on extra-intestinal autoimmune diseases	NATURE REVIEWS IMMUNOLOGY	Review; Early Access	RIKEN; National Institute of Infectious Diseases (NIID); Luxembourg Institute of Health; University of Southern Denmark; Odense University Hospital; University of Southern Denmark; Odense University Hospital; Yokohama City University; Chiba University; Gunma University		10.1038/s41577-022-00727-y	The prevalence of autoimmune diseases (ADs) worldwide has rapidly increased over the past few decades. Thus, in addition to the classical risk factors for ADs, such as genetic polymorphisms, infections and smoking, environmental triggers have been considered. Recent sequencing-based approaches have revealed that patients with extra-intestinal ADs, such as multiple sclerosis, rheumatoid arthritis,…
459	Zundler, S; Gunther, C; Kremer, AE; Zaiss, MM; Rothhammer, V; Neurath, MF	Gut immune cell trafficking: inter-organ communication and immune-mediated inflammation	NATURE REVIEWS GASTROENTEROLOGY & HEPATOLOGY	Review; Early Access	University of Erlangen Nuremberg; University of Erlangen Nuremberg; University of Zurich; University Zurich Hospital; University of Erlangen Nuremberg; University of Erlangen Nuremberg		10.1038/s41575-022-00663-1	Immune cell trafficking is a complex and tightly regulated process that is indispensable for the body's fight against pathogens. However, it is also increasingly acknowledged that dysregulation of cell trafficking contributes to the pathogenesis of immune-mediated inflammatory diseases (IMIDs) in gastroenterology and hepatology, such as inflammatory bowel disease and primary sclerosing cholangiti…

## Sheet: Interaction between RA and GM
Subject	NO.	Authors	Article Title	Source Title	Publication Year	DOI	Abstract
Human	1	Weisbart, RH; Min, Y; Wong, AL; Kang, J; Kwunyeun, S; Lin, A; Kim, J; Chan, G; Wakelin, R; Sohn, W; Chang, SS; Nishimura, RN	Selective IgA immune unresponsiveness to Proteus mirabilis fumarate reductase A-chain in rheumatoid arthritis	JOURNAL OF RHEUMATOLOGY	2005		Objective. To determine if selective immune unresponsiveness to microbial antigens is associated with predisposition to rheumatoid arthritis (RA). Methods. Proteins from Proteus mirabilis lysate were isolated by SDS-PAGE and examined by Western blotting for antibody responses in sera from patients with RA compared to healthy subjects and patients with psoriatic arthritis (PsA). Results. Although …
	2	Siala, M; Jaulhac, B; Gdoura, R; Sibilia, J; Fourati, H; Younes, M; Baklouti, S; Bargaoui, N; Sellami, S; Znazen, A; Barthel, C; Collin, E; Hammami, A; Sghir, A	Analysis of bacterial DNA in synovial tissue of Tunisian patients with reactive and undifferentiated arthritis by broad-range PCR, cloning and sequencing	ARTHRITIS RESEARCH & THERAPY	2008	10.1186/ar2398	Introduction Bacteria and/or their antigens have been implicated in the pathogenesis of reactive arthritis (ReA). Several studies have reported the presence of bacterial antigens and nucleic acids of bacteria other than those specified by diagnostic criteria for ReA in joint specimens from patients with ReA and various arthritides. The present study was conducted to detect any bacterial DNA and i…
	3	Vaahtovuo, J; Munukka, E; Korkeamaki, M; Luukkainen, R; Toivanen, P	Fecal microbiota in early rheumatoid arthritis	JOURNAL OF RHEUMATOLOGY	2008		Objective. To compare the composition of intestinal microbiota of patients with early rheumatoid arthritis (RA) or fibromyalgia (FM), fecal samples were collected from 51 patients with RA and 50 with FM. Methods. RA patients fulfilled the RA criteria of the American College of Rheumatology, and duration of their disease was <= 6 months. Only nonhospitalized patients from outpatient care were incl…
	4	Newkirk, MM; Zbar, A; Baron, M; Manges, AR	Distinct bacterial colonization patterns of Escherichia coli subtypes associate with rheumatoid factor status in early inflammatory arthritis	RHEUMATOLOGY	2010	10.1093/rheumatology/keq088	Objectives. The aetiology of RA is unknown; however, bacterial exposure, particularly to Escherichia coli, Proteus mirabilis and Klebsiella pneumoniae, has been linked to disease pathogenesis. The strongest association was observed for RF(+) RA. We compare colonization patterns of these bacteria, and the anti-bacterial antibody levels in early onset RF(+) and RF(-) inflammatory arthritis. Methods…
	5	Liu, XF; Zou, QH; Zeng, BH; Fang, YF; Wei, H	Analysis of Fecal Lactobacillus Community Structure in Patients with Early Rheumatoid Arthritis	CURRENT MICROBIOLOGY	2013	10.1007/s00284-013-0338-1	The objective of this study was to analyze human fecal Lactobacillus community and its relationship with rheumatoid arthritis. Samples taken from rheumatoid arthritis (RA) patients and healthy individuals were analyzed by quantitative real-time PCR. Bacterial DNA was extracted from feces, and amplicons of the Lactobacillus-specific regions of 16S rRNA were analyzed by denaturing gradient gel elec…
	6	Scher, JU; Sczesnak, A; Longman, RS; Segata, N; Ubeda, C; Bielski, C; Rostron, T; Cerundolo, V; Pamer, EG; Abramson, SB; Huttenhower, C; Littman, DR	Expansion of intestinal Prevotella copri correlates with enhanced susceptibility to arthritis	ELIFE	2013	10.7554/eLife.01202	Rheumatoid arthritis (RA) is a prevalent systemic autoimmune disease, caused by a combination of genetic and environmental factors. Animal models suggest a role for intestinal bacteria in supporting the systemic immune response required for joint inflammation. Here we performed 16S sequencing on 114 stool samples from rheumatoid arthritis patients and controls, and shotgun sequencing on a subset …
	7	Zhang, X; Zhang, DY; Jia, HJ; Feng, Q; Wang, DH; Liang, D; Wu, XN; Li, JH; Tang, LQ; Li, Y; Lan, Z; Chen, B; Li, YL; Zhong, HZ; Xie, HL; Jie, ZY; Chen, WN; Tang, SM; Xu, XQ; Wang, XK; Cai, XH; Liu, S; Xia, Y; Li, JY; Qiao, XY; Al-Aama, JY; Chen, H; Wang, L; Wu, QJ; Zhang, FC; Zheng, WJ; Li, YZ; Zhang, MR; Luo, GW; Xue, WB; Xiao, L; Li, J; Chen, WT; Xu, X; Yin, Y; Yang, HM; Wang, J; Kristiansen, K…	The oral and gut microbiomes are perturbed in rheumatoid arthritis and partly normalized after treatment	NATURE MEDICINE	2015	10.1038/nm.3914	We carried out metagenomic shotgun sequencing and a metagenome-wide association study (MGWAS) of fecal, dental and salivary samples from a cohort of individuals with rheumatoid arthritis (RA) and healthy controls. Concordance was observed between the gut and oral microbiomes, suggesting overlap in the abundance and function of species at different body sites. Dysbiosis was detected in the gut and…
	8	Chen, J; Wright, K; Davis, JM; Jeraldo, P; Marietta, EV; Murray, J; Nelson, H; Matteson, EL; Taneja, V	An expansion of rare lineage intestinal microbes characterizes rheumatoid arthritis	GENOME MEDICINE	2016	10.1186/s13073-016-0299-7	Background: The adaptive immune response in rheumatoid arthritis (RA) is influenced by an interaction between host genetics and environment, particularly the host microbiome. Association of the gut microbiota with various diseases has been reported, though the specific components of the microbiota that affect the host response leading to disease remain unknown. However, there is limited informati…
	9	Maeda, Y; Kurakawa, T; Umemoto, E; Motooka, D; Ito, Y; Gotoh, K; Hirota, K; Matsushita, M; Furuta, Y; Narazaki, M; Sakaguchi, N; Kayama, H; Nakamura, S; Iida, T; Saeki, Y; Kumanogoh, A; Sakaguchi, S; Takeda, K	Dysbiosis Contributes to Arthritis Development via Activation of Autoreactive T Cells in the Intestine	ARTHRITIS & RHEUMATOLOGY	2016	10.1002/art.39783	ObjectiveThe intestinal microbiota is involved in the pathogenesis of arthritis. Altered microbiota composition has been demonstrated in patients with rheumatoid arthritis (RA). However, it remains unclear how dysbiosis contributes to the development of arthritis. The aim of this study was to investigate whether altered composition of human intestinal microbiota in RA patients contributes to the …
	10	Shao, TJ; He, ZX; Xie, ZJ; Li, HC; Wang, MJ; Wen, CP	Characterization of ankylosing spondylitis and rheumatoid arthritis using H-1 NMR-based metabolomics of human fecal extracts	METABOLOMICS	2016	10.1007/s11306-016-1000-2	Introduction The differences in fecal metabolome between ankylosing spondylitis (AS)/rheumatoid arthritis (RA) patients and healthy individuals could be the reason for an autoimmune disorder. Objectives The study explored the fecal metabolome difference between AS/RA patients and healthy controls to clarify human immune disturbance. Methods Fecal samples from 109 individuals (healthy controls 34,…
	11	Breban, M; Tap, J; Leboime, A; Said-Nahal, R; Langella, P; Chiocchia, G; Furet, JP; Sokol, H	Faecal microbiota study reveals specific dysbiosis in spondyloarthritis	ANNALS OF THE RHEUMATIC DISEASES	2017	10.1136/annrheumdis-2016-211064	Objective Altered microbiota composition or dysbiosis is suspected to be implicated in the pathogenesis of chronic inflammatory diseases, such as spondyloarthritis (SpA) and rheumatoid arthritis (RA). Methods 165 ribosomal RNA gene sequencing was performed on faecal DNA isolated from stool samples in two consecutive cross-sectional cohorts, each comprising three groups of adult volunteers: SpA, R…
	12	Forbes, JD; Chen, CY; Knox, NC; Marrie, RA; El-Gabalawy, H; de Kievit, T; Alfa, M; Bernstein, CN; Van Domselaar, G	A comparative study of the gut microbiota in immune-mediated inflammatory diseasesdoes a common dysbiosis exist?	MICROBIOME	2018	10.1186/s40168-018-0603-4	BackgroundImmune-mediated inflammatory disease (IMID) represents a substantial health concern. It is widely recognized that IMID patients are at a higher risk for developing secondary inflammation-related conditions. While an ambiguous etiology is common to all IMIDs, in recent years, considerable knowledge has emerged regarding the plausible role of the gut microbiome in IMIDs. This study used 1…
	13	Pedrogo, DAM; Chen, J; Hillmann, B; Jeraldo, P; Al-Ghalith, G; Taneja, V; Davis, JM; Knights, D; Nelson, H; Faubion, WA; Raffals, L; Kashyap, PC	An Increased Abundance of Clostridiaceae Characterizes Arthritis in Inflammatory Bowel Disease and Rheumatoid Arthritis: A Cross-sectional Study	INFLAMMATORY BOWEL DISEASES	2019	10.1093/ibd/izy318	Background: Inflammatory bowel diseases (IBDs) are a group of heterogeneous inflammatory conditions affecting the gastrointestinal tract. Although there is considerable evidence linking the gut microbiota to intestinal inflammation, there is limited knowledge on its potential role in the development of extraintestinal manifestations of IBD. Methods: Four groups of patients were included: IBD-asso…
	14	Jeong, Y; Kim, JW; You, HJ; Park, SJ; Lee, J; Ju, JH; Park, MS; Jin, H; Cho, ML; Kwon, B; Park, SH; Ji, GE	Gut Microbial Composition and Function Are Altered in Patients with Early Rheumatoid Arthritis	JOURNAL OF CLINICAL MEDICINE	2019	10.3390/jcm8050693	Rheumatoid arthritis (RA) is an autoimmune disease characterized by synovial inflammation of the joints and extra-articular manifestations. Recent studies have shown that microorganisms affect RA pathogenesis. However, few studies have examined the microbial distribution of early RA patients, particularly female patients. In the present study, we investigated the gut microbiome profile and microb…
	15	Alpizar-Rodriguez, D; Lesker, TR; Gronow, A; Gilbert, B; Raemy, E; Lamacchia, C; Gabay, C; Finckh, A; Strowig, T	Prevotella copri in individuals at risk for rheumatoid arthritis	ANNALS OF THE RHEUMATIC DISEASES	2019	10.1136/annrheumdis-2018-214514	Objectives Rheumatoid arthritis (RA) has been associated with a relative expansion of faecal Prevotellaceae. To determine the microbiome composition and prevalence of Prevotella spp. in a group of individuals at increased risk for RA, but prior to the development of the disease. Methods I n an ongoing cohort study of first-degree relatives (FDRs) of patients with RA, we identified 'FDR controls',…
	16	Sultan, AA; Mallen, C; Muller, S; Hider, S; Scott, I; Helliwell, T; Hall, LJ	Antibiotic use and the risk of rheumatoid arthritis: a population-based case-control study	BMC MEDICINE	2019	10.1186/s12916-019-1394-6	Background Antibiotic-induced disturbances of the human microbiota have been implicated in the development of chronic autoimmune conditions. This study aimed to assess whether antibiotic use is associated with the onset of rheumatoid arthritis (RA). Methods A nested case-control study was conducted utilising data from the primary care Clinical Practice Research Datalink (CPRD). Patients with an i…
	17	Asquith, M; Sternes, PR; Costello, ME; Karstens, L; Diamond, S; Martin, TM; Li, ZX; Marshall, MS; Spector, TD; Cao, KAL; Rosenbaum, JT; Brown, MA	HLA Alleles Associated With Risk of Ankylosing Spondylitis and Rheumatoid Arthritis Influence the Gut Microbiome	ARTHRITIS & RHEUMATOLOGY	2019	10.1002/art.40917	Objective HLA alleles affect susceptibility to more than 100 diseases, but the mechanisms that account for these genotype-disease associations are largely unknown. HLA alleles strongly influence predisposition to ankylosing spondylitis (AS) and rheumatoid arthritis (RA). Both AS and RA patients have discrete intestinal and fecal microbiome signatures. Whether these changes are the cause or conseq…
	18	Lee, JY; Mannaa, M; Kim, Y; Kim, J; Kim, GT; Seo, YS	Comparative Analysis of Fecal Microbiota Composition Between Rheumatoid Arthritis and Osteoarthritis Patients	GENES	2019	10.3390/genes10100748	The aim of this study was to investigate differences between the gut microbiota composition in patients with rheumatoid arthritis (RA) and those with osteoarthritis (OA). Stool samples from nine RA patients and nine OA patients were collected, and DNA was extracted. The gut microbiome was assessed using 16S rRNA gene amplicon sequencing. The structures and differences in the gut microbiome betwee…
	19	Rodrigues, GSP; Cayres, LCF; Goncalves, FP; Takaoka, NNC; Lengert, AH; Tansini, A; Brisotti, JL; Sasdelli, CBG; de Oliveira, GLV	Detection of Increased Relative Expression Units of Bacteroides and Prevotella, and Decreased Clostridium leptum in Stool Samples from Brazilian Rheumatoid Arthritis Patients: A Pilot Study	MICROORGANISMS	2019	10.3390/microorganisms7100413	Interactions between gut microbes and disease modifying antirheumatic drugs (DMARDs) have been proposed. The aim of the present study was to evaluate the presence of some specific bacteria in stool samples from Brazilian RA patients receiving DMARDs and correlate these data with diet, clinical parameters, and cytokines. Stool samples were used for gut bacteria evalutation by qPCR. Serum samples w…
	20	Sun, Y; Chen, Q; Lin, P; Xu, R; He, DY; Ji, WQ; Bian, YQ; Shen, Y; Li, QT; Liu, C; Dong, K; Tang, YW; Pei, ZH; Yang, LY; Lu, HZ; Guo, XK; Xiao, LB	Characteristics of Gut Microbiota in Patients With Rheumatoid Arthritis in Shanghai, China	FRONTIERS IN CELLULAR AND INFECTION MICROBIOLOGY	2019	10.3389/fcimb.2019.00369	Little is known regarding differences in the gut microbiomes of rheumatoid arthritis (RA) patients and healthy cohorts in China. This study aimed to identify differences in the fecal microbiomes of 66 Chinese patients with RA and 60 healthy Chinese controls. The V3-V4 variable regions of bacterial 16S rRNA genes were sequenced with the Illumina system to define the bacterial composition. The alph…
	21	Chiang, HI; Li, JR; Liu, CC; Liu, PY; Chen, HH; Chen, YM; Lan, JL; Chen, DY	An Association of Gut Microbiota with Different Phenotypes in Chinese Patients with Rheumatoid Arthritis	JOURNAL OF CLINICAL MEDICINE	2019	10.3390/jcm8111770	We aimed to investigate the association of gut microbiota with disease activity, inflammatory parameters, and auto-antibodies profile in rheumatoid arthritis (RA). A total of 138 RA patients and 21 healthy controls (HC) were enrolled. Fecal samples were collected for bacterial DNA extraction and 16S ribosome (r)RNA sequencing, followed by analyses of gut microbiota composition. Serum levels of tu…
	22	Wang, Y; Li, HB; Wang, J; Zhao, J; Tie, N; Bai, LJ	Associations of Changes in Serum Inflammatory Factors, MMP-3, 25(OH)D and Intestinal Flora with Osteoporosis and Disease Activity in Rheumatoid Arthritis Patients	CLINICAL LABORATORY	2020	10.7754/Clin.Lab.2020.200242	Background: To explore the associations of changes in serum inflammatory factors, matrix metalloproteinase-3 (MMP-3), 25-hydroxy vitamin D [25(OH)D], and intestinal flora with osteoporosis and disease activity in rheumatoid arthritis (RA) patients, so as to provide references for clinical diagnosis and treatment. Methods: A total of 98 RA patients were selected as the objects of study (RA group),…
	23	Ding, HD; Han, WL; Huang, MC; Hu, G; Lu, Y	ANALYSIS AND REGULATION THERAPY OF INTESTINAL FLORA IN 50 PATIENTS WITH RHEUMATOID ARTHRITIS	ACTA MEDICA MEDITERRANEA	2020	10.19193/0393-6384_2020_2_151	Objective: To study and analyze the difference of intestinal flora between rheumatoid arthritis (RA) patients and healthy controls, explore the relationship between intestinal flora and the genesis and development of RA, and improve the conditions of RA patients based on diet regulation therapy. Methods: A total of 50 RA patients (RA group, average age: 56 years old) and 20 healthy controls (Con …
	24	Kishikawa, T; Maeda, Y; Nii, T; Motooka, D; Matsumoto, Y; Matsushita, M; Matsuoka, H; Yoshimura, M; Kawada, S; Teshigawara, S; Oguro, E; Okita, Y; Kawamoto, K; Higa, S; Hirano, T; Narazaki, M; Ogata, A; Saeki, Y; Nakamura, S; Inohara, H; Kumanogoh, A; Takeda, K; Okada, Y	Metagenome-wide association study of gut microbiome revealed novel aetiology of rheumatoid arthritis in the Japanese population	ANNALS OF THE RHEUMATIC DISEASES	2020	10.1136/annrheumdis-2019-215743	Objective The causality and pathogenic mechanism of microbiome composition remain elusive in many diseases, including autoimmune diseases such as rheumatoid arthritis (RA). This study aimed to elucidate gut microbiome's role in RA pathology by a comprehensive metagenome-wide association study (MWAS). Methods We conducted MWAS of the RA gut microbiome in the Japanese population (n(case)=82, n(cont…
	25	Hammad, DBM; Hider, SL; Liyanapathirana, VC; Tonge, DP	Molecular Characterization of Circulating Microbiome Signatures in Rheumatoid Arthritis	FRONTIERS IN CELLULAR AND INFECTION MICROBIOLOGY	2020	10.3389/fcimb.2019.00440	Rheumatoid Arthritis (RA) has been increasingly associated with perturbations to the microbial communities that reside in and on the body (the microbiome), in both human and animal studies. To date, such studies have mainly focused on the microbial communities that inhabit the gut and oral cavity. Mounting evidence suggests that microbial DNA can be detected in the blood circulation using a range…
	26	Mena-Vazquez, N; Ruiz-Limon, P; Moreno-Indias, I; Manrique-Arija, S; Tinahones, FJ; Fernandez-Nebro, A	Expansion of Rare and Harmful Lineages is Associated with Established Rheumatoid Arthritis	JOURNAL OF CLINICAL MEDICINE	2020	10.3390/jcm9041044	Objectives: To characterize the gut microbiota profile in rheumatoid arthritis (RA) patients and investigate its association with certain characteristics of RA. Patients and methods: A nested case-control cohort of 40 patients with RA and 40 sex-age matched controls was studied. Subjects with diabetes, with any other inflammatory disease, practicing extreme diets, taking antibiotics, probiotics o…
	27	Armstrong, D; Dregan, A; Ashworth, M; White, P; McGee, C; de Lusignan, S	Influence of prior antibiotic use on risk of rheumatoid arthritis: case control study in general practice	RHEUMATOLOGY	2020	10.1093/rheumatology/kez452	Objectives. To test the hypothesis that prior antibiotics influences the risk of developing RA. Methods. A case-control study was conducted over 15 years using the UK's Royal College of General Practitioners Research and Surveillance Centre database. The frequency and type of antibiotic prescription for patients who subsequently developed RA were compared with antibiotic prescriptions in a contro…
	28	Wells, PM; Adebayo, AS; Bowyer, RCE; Freidin, MB; Finckh, A; Strowig, T; Lesker, TR; Alpizar-Rodriguez, D; Gilbert, B; Kirkham, B; Cope, AP; Steves, CJ; Williams, FMK	Associations between gut microbiota and genetic risk for rheumatoid arthritis in the absence of disease: a cross-sectional study	LANCET RHEUMATOLOGY	2020		Background Rheumatoid arthritis is a chronic inflammatory autoimmune disease that is associated with reduced life expectancy. The disease is heritable and an extensive repertoire of genetic variants have been identified. The gut microbiota might represent an environmental risk factor for rheumatoid arthritis. We aimed to assess whether known rheumatoid arthritis risk alleles were associated with …
	29	Liu, ZH; Wu, YX; Luo, YB; Wei, SX; Lu, CY; Zhou, Y; Wang, J; Miao, T; Lin, H; Zhao, Y; Liu, Q; Liu, Y	Self-Balance of Intestinal Flora in Spouses of Patients With Rheumatoid Arthritis	FRONTIERS IN MEDICINE	2020	10.3389/fmed.2020.00538	We sought to characterize and assess differences in compositions of intestinal flora between patients with rheumatoid arthritis (RA) and their respective spouses. Eighty volunteers were recruited, including 30 pairs of RA patients and their spouses, and 20 healthy individuals. Fresh stool samples were collected, processed, and 16S rRNA-sequencing was performed. Data were analyzed using an operati…
	30	Li, Y; Zhang, SX; Yin, XF; Zhang, MX; Qiao, J; Xin, XH; Chang, MJ; Gao, C; Li, YF; Li, XF	The Gut Microbiota and Its Relevance to Peripheral Lymphocyte Subpopulations and Cytokines in Patients with Rheumatoid Arthritis	JOURNAL OF IMMUNOLOGY RESEARCH	2021	10.1155/2021/6665563	Growing experimental and clinical evidence suggests that a chronic inflammatory response induced by gut microbiome critically contribute to the development of rheumatoid arthritis (RA). Previous studies demonstrated the disturbance of lymphocyte subpopulations in RA patients. The purpose of this study was to explore the characteristics of gut microbiome and the associations between bacterium and …
	31	Rooney, CM; Mankia, K; Mitra, S; Moura, IB; Emery, P; Wilcox, MH	Perturbations of the gut microbiome in anti-CCP positive individuals at risk of developing rheumatoid arthritis	RHEUMATOLOGY	2021	10.1093/rheumatology/keaa792	Objective: Individuals with newly diagnosed RA have a distinct microbiome when compared with healthy controls. However, little is known as to when these microbiome perturbations begin. Using a prospective at-risk cohort of individuals positive for anti-citrullinated protein (anti-CCP) antibody with new onset musculoskeletal symptoms, but without clinical arthritis, we investigated for the presenc…
	32	Chen, YM; Ma, CY; Liu, LX; He, JQ; Zhu, CX; Zheng, FP; Dai, WE; Hong, XP; Liu, DZ; Tang, D; Dai, Y	Analysis of gut microbiota and metabolites in patients with rheumatoid arthritis and identification of potential biomarkers	AGING-US	2021		Rheumatoid arthritis (RA) is an autoimmune disease described by joint destruction, synovitis and pannus formation. The gut microbiota acts as an environmental factor that plays an important role in RA, but little research regarding the etiopathogenic mechanisms of the microbiome in RA has been carried out. We used an integrated approach of 16S rRNA gene sequencing and ultrahigh-performance liquid…
	33	Jeong, Y; Jhun, J; Lee, SY; Na, HS; Choi, J; Cho, KH; Lee, SY; Lee, AR; Park, SJ; You, HJ; Kim, JW; Park, MS; Kwon, B; Cho, ML; Ji, GE; Park, SH	Therapeutic Potential of a Novel Bifidobacterium Identified Through Microbiome Profiling of RA Patients With Different RF Levels	FRONTIERS IN IMMUNOLOGY	2021	10.3389/fimmu.2021.736196	The potential therapeutic effects of probiotic bacteria in rheumatoid arthritis (RA) remain controversial. Thus, this study aimed to discover potential therapeutic bacteria based on the relationship between the gut microbiome and rheumatoid factor (RF) in RA. Bacterial genomic DNA was extracted from the fecal samples of 93 RA patients and 16 healthy subjects. Microbiota profiling was conducted th…
	34	Yu, D; Du, JP; Pu, X; Zheng, LY; Chen, SS; Wang, N; Li, J; Chen, SY; Pan, SB; Shen, B	The Gut Microbiome and Metabolites Are Altered and Interrelated in Patients With Rheumatoid Arthritis	FRONTIERS IN CELLULAR AND INFECTION MICROBIOLOGY	2022	10.3389/fcimb.2021.763507	The relationship among the gut microbiome, global fecal metabolites and rheumatoid arthritis (RA) has not been systematically evaluated. In this study, we performed 16S rDNA sequencing and liquid chromatography-tandem mass spectrometry (LC-MS/MS)-based nontargeted metabolomic profiling on feces of 26 untreated RA patients and 26 healthy controls. Twenty-six genera and forty-one MS2-identified met…
	35	Wang, Q; Zhang, SX; Chang, MJ; Qiao, J; Wang, CH; Li, XF; Yu, Q; He, PF	Characteristics of the Gut Microbiome and Its Relationship With Peripheral CD4(+) T Cell Subpopulations and Cytokines in Rheumatoid Arthritis	FRONTIERS IN MICROBIOLOGY	2022	10.3389/fmicb.2022.799602	This study investigated the association between intestinal microbiota abundance and diversity and cluster of differentiation (CD)4(+) T cell subpopulations, cytokine levels, and disease activity in rheumatoid arthritis RA. A total of 108 rheumatoid arthritis (RA) patients and 99 healthy control (HC) subjects were recruited. PICRUSt2 was used for functional metagenomic predictions. Absolute counts…
	36	Huang, Q; Su, J; Zhang, WH; Chang, SJ; Li, SL; Zhou, J; Zhang, J; Li, X; Huang, H; Wang, TT; Jiang, XJ; Wu, JH; Zhu, J; Zeng, FX	Multi-omics analysis of biomarkers and molecular mechanism of rheumatoid arthritis with bone destruction	JOINT BONE SPINE	2022	10.1016/j.jbspin.2022.105438	Objectives: Our study aimed to elucidate the role of metabolites, bacteria, and fungi in rheumatoid arthritis (RA) patients with bone destruction (BD(+)) and identify some biomarkers to predicate bone progression of RA. Methods: Plasma metabolites of the 127 RA patients and 69 healthy controls were conducted by using nontargeted liquid chromatography-mass spectrometry (LC-MS). The gut bacteria an…
	37	Zhu, J; Wang, TT; Lin, YF; Xiong, MH; Chen, JH; Jian, CC; Zhang, J; Xie, HH; Zeng, FW; Huang, Q; Su, J; Zhao, Y; Li, SL; Zeng, FX	The change of plasma metabolic profile and gut microbiome dysbiosis in patients with rheumatoid arthritis	FRONTIERS IN MICROBIOLOGY	2022	10.3389/fmicb.2022.931431	ObjectiveRheumatoid arthritis (RA) is a chronic inflammatory joint disease, which is associated with progressive disability, systemic complications, and early death. But its etiology and pathogenesis are not fully understood. We aimed to investigate the alterations in plasma metabolite profiles, gut bacteria, and fungi and their role of them in the pathogenesis of RA. MethodsMetabolomics profilin…
	38	El Menofy, NG; Ramadan, M; Abdelbary, ER; Ibrahim, HG; Azzam, AI; Ghit, MM; Ezz, AS; Gazar, YA; Salah, M	Bacterial Compositional Shifts of Gut Microbiomes in Patients with Rheumatoid Arthritis in Association with Disease Activity	MICROORGANISMS	2022	10.3390/microorganisms10091820	Background: Rheumatoid arthritis (RA) is a chronic inflammatory disabling autoimmune disorder. Little is known regarding the association between the gut microbiome and etiopathogenesis of RA. We aimed to dissect the differences in gut microbiomes associated with RA in comparison to healthy individuals and, in addition, to identify the shifts in the bacterial community in association with disease …
	39	Ruiz-Limon, P; Mena-Vazquez, N; Moreno-Indias, I; Manrique-Arija, S; Lisbona-Montanez, JM; Cano-Garcia, L; Tinahones, FJ; Fernandez-Nebro, A	Collinsella is associated with cumulative inflammatory burden in an established rheumatoid arthritis cohort	BIOMEDICINE & PHARMACOTHERAPY	2022	10.1016/j.biopha.2022.113518	Objective: To analyze the gut microbiota of patients with rheumatoid arthritis (RA) according to disease activity. Methods: An observational cross-sectional study of 110 patients with RA and 110 age-and sex-matched controls was performed. Patients were classified according to the disease activity (DAS28 >= 3.2 or DAS28 < 3.2). Clinical and epidemiological variables were included. The gut microbio…
	40	Cheng, MY; Zhao, Y; Cui, YZ; Zhong, CF; Zha, YG; Li, SF; Cao, GX; Li, MA; Zhang, L; Ning, K; Han, JX	Stage-specific roles of microbial dysbiosis and metabolic disorders in rheumatoid arthritis	ANNALS OF THE RHEUMATIC DISEASES	2022	10.1136/ard-2022-222871	Objective Rheumatoid arthritis (RA) is a progressive disease including four stages, where gut microbiome is associated with pathogenesis. We aimed to investigate stage-specific roles of microbial dysbiosis and metabolic disorders in RA. Methods We investigated stage-based profiles of faecal metagenome and plasma metabolome of 76 individuals with RA grouped into four stages (stages I-IV) according…
	41	Marazzato, M; Iannuccelli, C; Guzzo, MP; Nencioni, L; Lucchino, B; Radocchia, G; Gioia, C; Bonfiglio, G; Neroni, B; Guerrieri, F; Pantanella, F; Garzoli, S; Vomero, M; Barbati, C; Di Franco, M; Schippa, S	Gut Microbiota Structure and Metabolites, Before and After Treatment in Early Rheumatoid Arthritis Patients: A Pilot Study	FRONTIERS IN MEDICINE	2022	10.3389/fmed.2022.921675	Rheumatoid Arthritis (RA) is a chronic systemic autoimmune disease. Modifications of gut microbiota seem to be associated with the disease, but the impact of gut microbiota on therapies' outcome remains unclear. A role of T cells in RA pathogenesis has been addressed, particularly on the Th17/Treg cells balance. Our study aimed to evaluate in early RA (ERA) patients compared to a control group, f…
	42	Sun, XY; Wang, YS; Le, XK; Wang, ML; Dong, JY; Tang, W; Lee, ZJ; Guo, YL; Li, M; Li, YY	Alterations of gut fungal microbiota in patients with rheumatoid arthritis	PEERJ	2022	10.7717/peerj.13037	Background: Rheumatoid arthritis (RA) is a systemic autoimmune disease, in addition, gut microbiota plays an important role in the etiology of RA. However, our understanding of alterations to the gut fungal microbiota in Chinese population with RA is still limited. Methods: Serum samples were obtained from 62 patients with RA, and 39 age- and gender-matched healthy controls (HCs). Fecal samples w…
Animal	43	Yoshino, S; Yamaki, K; Taneda, S; Yanagisawa, R; Takano, H	Reactivation of antigen-induced arthritis in mice by oral administration of lipopolysaccharide	SCANDINAVIAN JOURNAL OF IMMUNOLOGY	2005	10.1111/j.1365-3083.2005.01647.x	We examined whether oral administration of lipopolysaccharide (LPS) from Escherichia coli reactivated antigen-induced arthritis (AIA) in mice that is one of models of human rheumatoid arthritis. To induce AIA, mice were immunized by subcutaneous injection of ovalbumin (OVA) emulsified with complete Freund's adjuvant into the base of the tail (day 0) followed by intraarticular injection of OVA on …
	44	Rovensky, J; Stancikova, M; Svik, K; Uteseny, J; Bauerova, K; Jurcovicova, J	Treatment of adjuvant-induced arthritis with the combination of methotrexate and probiotic bacteria Escherichia coli O83 (ColinfantA (R))	FOLIA MICROBIOLOGICA	2009	10.1007/s12223-009-0045-2	A certain relationship was observed between the gastrointestinal system, arthritis and immune system. Patients with rheumatoid arthritis have an altered microflora composition and disturbed intestinal defensive barrier. Effect of probiotic bacteria (ColinfantA (R); COL) with known favorable effect on intestinal microflora was determined on the methotrexate (MTX) treatment of adjuvant arthritis. R…
	45	Sonoyama, K; Miki, A; Sugita, R; Goto, H; Nakata, M; Yamaguchi, N	Gut colonization by Candida albicans aggravates inflammation in the gut and extra-gut tissues in mice	MEDICAL MYCOLOGY	2011	10.3109/13693786.2010.511284	We examined whether Candida albicans gut colonization aggravates immune diseases in mice. Chronic and latent C. albicans gut colonization was established by the intragastric inoculation of C. albicans in mice fed as part of a purified diet. Allergic diarrhea was induced by repetitive intragastric administration of ovalbumin in sensitized BALB/c mice. Contact hypersensitivity was evaluated by meas…
	46	Gomez, A; Luckey, D; Yeoman, CJ; Marietta, EV; Miller, MEB; Murray, JA; White, BA; Taneja, V	Loss of Sex and Age Driven Differences in the Gut Microbiome Characterize Arthritis-Susceptible*0401 Mice but Not Arthritis-Resistant*0402 Mice	PLOS ONE	2012	10.1371/journal.pone.0036095	Background: HLA-DRB1* 0401 is associated with susceptibility, while HLA-DRB1* 0402 is associated with resistance to developing rheumatoid arthritis (RA) and collagen-induced arthritis in humans and transgenic mice respectively. The influence of gut-joint axis has been suggested in RA, though not yet proven. Methodology/Principal Findings: We have used HLA transgenic mice carrying arthritis suscep…
	47	Dorozynska, I; Majewska-Szczepanik, M; Marcinska, K; Szczepanik, M	Partial depletion of natural gut flora by antibiotic aggravates collagen induced arthritis (CIA) in mice	PHARMACOLOGICAL REPORTS	2014	10.1016/j.pharep.2013.09.007	Background: Rheumatoid arthritis (RA) is a chronic inflammatory disease that affects about 1% of the adult population and occurs twice as frequently among women than men. At present it is accepted that pathogenesis of RA is based on inflammatory response mediated by CD4(+) Th1 and Th17 lymphocytes. The most commonly applied model imitating RA is the collagen induced arthritis (CIA). A growing evi…
	48	Liu, XF; Zeng, BH; Zhang, J; Li, WX; Mou, FX; Wang, H; Zou, QH; Zhong, B; Wu, LK; Wei, H; Fang, YF	Role of the Gut Microbiome in Modulating Arthritis Progression in Mice	SCIENTIFIC REPORTS	2016	10.1038/srep30594	Genetics alone cannot explain most cases of rheumatoid arthritis (RA). Thus, investigating environmental factors such as the gut microbiota may provide new insights into the initiation and progression of RA. In this study, we performed 16S rRNA sequencing to characterise the gut microbiota of DBA1 mice that did or did not develop arthritis after induction with collagen. We found that divergence i…
	49	Maeda, Y; Kurakawa, T; Umemoto, E; Motooka, D; Ito, Y; Gotoh, K; Hirota, K; Matsushita, M; Furuta, Y; Narazaki, M; Sakaguchi, N; Kayama, H; Nakamura, S; Iida, T; Saeki, Y; Kumanogoh, A; Sakaguchi, S; Takeda, K	Dysbiosis Contributes to Arthritis Development via Activation of Autoreactive T Cells in the Intestine	ARTHRITIS & RHEUMATOLOGY	2016	10.1002/art.39783	ObjectiveThe intestinal microbiota is involved in the pathogenesis of arthritis. Altered microbiota composition has been demonstrated in patients with rheumatoid arthritis (RA). However, it remains unclear how dysbiosis contributes to the development of arthritis. The aim of this study was to investigate whether altered composition of human intestinal microbiota in RA patients contributes to the …
	50	Marietta, EV; Murray, JA; Luckey, DH; Jeraldo, PR; Lamba, A; Patel, R; Luthra, HS; Mangalam, A; Taneja, V	Suppression of Inflammatory Arthritis by Human Gut-Derived Prevotella histicola in Humanized Mice	Arthritis & Rheumatology	2016	10.1002/art.39785	Objective. The gut microbiome regulates host immune homeostasis. Rheumatoid arthritis (RA) is associated with intestinal dysbiosis. This study was undertaken to test the ability of a human gut-derived commensal to modulate immune response and treat arthritis in a humanized mouse model. Methods. We isolated a commensal bacterium, Prevotella histicola, that is native to the human gut and has system…
	51	Liu, XF; Zhang, J; Zou, QH; Zhong, B; Wang, H; Mou, FX; Wu, LK; Fang, YF	Lactobacillus salivarius Isolated from Patients with Rheumatoid Arthritis Suppresses Collagen-Induced Arthritis and Increases Treg Frequency in Mice	JOURNAL OF INTERFERON AND CYTOKINE RESEARCH	2016	10.1089/jir.2016.0057	Previously, we demonstrated that Lactobacillus salivarius was more abundant in patients with rheumatoid arthritis (RA), an inflammatory autoimmune disease wherein the gut microbiota is altered, than in healthy individuals. However, the effect of L. salivarius in RA is unclear. Hence, we investigated the effect of L. salivarius isolated from patients with RA on collagen-induced arthritis (CIA) in …
	52	Tan, TG; Sefik, E; Geva-Zatorsky, N; Kua, L; Naskar, D; Teng, F; Pasman, L; Ortiz-Lopez, A; Jupp, R; Wu, HJJ; Kasper, DL; Benoist, C; Mathis, D	Identifying species of symbiont bacteria from the human gut that, alone, can induce intestinal Th17 cells in mice	PROCEEDINGS OF THE NATIONAL ACADEMY OF SCIENCES OF THE UNITED STATES OF AMERICA	2016	10.1073/pnas.1617460113	Th17 cells accrue in the intestine in response to particular microbes. In rodents, segmented filamentous bacteria (SFB) induce intestinal Th17 cells, but analogously functioning microbes in humans remain undefined. Here, we identified human symbiont bacterial species, in particular Bifidobacterium adolescentis, that could, alone, induce Th17 cells in the murine intestine. Similar to SFB, B. adole…
	53	Sato, K; Takahashi, N; Kato, T; Matsuda, Y; Yokoji, M; Yamada, M; Nakajima, T; Kondo, N; Endo, N; Yamamoto, R; Noiri, Y; Ohno, H; Yamazaki, K	Aggravation of collagen-induced arthritis by orally administered Porphyromonas gingivalis through modulation of the gut microbiota and gut immune system	SCIENTIFIC REPORTS	2017	10.1038/s41598-017-07196-7	Porhyromonas gingivalis, a causative bacterium of periodontitis, is implicated in the etiology of rheumatoid arthritis (RA), mainly because of expressing peptidyl arginine deiminase (PAD) that generates RA-related autoantigens. However, compared with other periodontopathic bacteria, the precise role of P. gingivalis in RA is largely unknown. We found that orally administered P. gingivalis changed…
	54	Teng, F; Felix, KM; Bradley, CP; Naskar, D; Ma, HQ; Raslan, WA; Wu, HJJ	The impact of age and gut microbiota on Th17 and Tfh cells in K/BxN autoimmune arthritis	ARTHRITIS RESEARCH & THERAPY	2017	10.1186/s13075-017-1398-6	Background: Age is an important risk factor for rheumatoid arthritis (RA), which often develops in middle age. However, how age-associated changes in immunity impact RA is poorly understood. Gut microbiota are known to be involved in the pathogenesis of RA, but the effects of microbiota in older subjects remain mostly unknown. Methods: We used segmented filamentous bacteria (SFB), a gut commensal…
	55	Rogier, R; Evans-Marin, H; Manasson, J; van der Kraan, PM; Walgreen, B; Helsen, MM; van den Bersselaar, LA; van de Loo, FA; Van Lent, PL; Abramson, SB; van den Berg, WB; Koenders, MI; Scher, JU; Abdollahi-Roodsaz, S	Alteration of the intestinal microbiome characterizes preclinical inflammatory arthritis in mice and its modulation attenuates established arthritis	SCIENTIFIC REPORTS	2017	10.1038/s41598-017-15802-x	Perturbations of the intestinal microbiome have been observed in patients with new-onset and chronic autoimmune inflammatory arthritis. However, it is currently unknown whether these alterations precede the development of arthritis or are rather a consequence of disease. Modulation of intestinal microbiota by oral antibiotics or germ-free condition can prevent arthritis in mice. Yet, the therapeu…
	56	Jubair, WK; Hendrickson, JD; Severs, EL; Schulz, HM; Adhikari, S; Ir, D; Pagan, JD; Anthony, RM; Robertson, CE; Frank, DN; Banda, NK; Kuhn, KA	Modulation of Inflammatory Arthritis in Mice by Gut Microbiota Through Mucosal Inflammation and Autoantibody Generation	ARTHRITIS & RHEUMATOLOGY	2018	10.1002/art.40490	Objective. Observations of microbial dysbiosis in patients with rheumatoid arthritis (RA) have raised interest in studying microbial-mucosal interactions as a potential trigger of RA. Using the murine collagen-induced arthritis (CIA) model, we undertook this study to test our hypothesis that microbiota modulate immune responses leading to autoimmune arthritis. Methods. CIA was induced by immuniza…
	57	Balakrishnan, B; Luckey, D; Taneja, V	Autoimmunity-Associated Gut Commensals Modulate Gut Permeability and Immunity in Humanized Mice	MILITARY MEDICINE	2019	10.1093/milmed/usy309	Objective Although the etiology of rheumatoid arthritis (RA) is unknown, recent studies have led to the concept that gut dysbiosis may be involved in onset. In this study, we aimed to determine if human gut commensals modulate the immune response and gut epithelial integrity in DQ8 mice. Methods DQ8 mice were orally gavaged with RA-associated (Eggerthella lenta or Collinsella aerofaciens) and non…
	58	Peng, JN; Lu, XR; Xie, KL; Xu, YS; He, R; Guo, L; Han, YX; Wu, S; Dong, XR; Lu, Y; Liu, ZY; Cao, W; Gong, MX	Dynamic Alterations in the Gut Microbiota of Collagen-Induced Arthritis Rats Following the Prolonged Administration of Total Glucosides of Paeony	FRONTIERS IN CELLULAR AND INFECTION MICROBIOLOGY	2019	10.3389/fcimb.2019.00204	Rheumatoid arthritis (RA) is a common autoimmune disease linked to chronic inflammation. Dysbiosis of the gut microbiota has been proposed to contribute to the risk of RA, and a large number of researchers have investigated the gut-joint axis hypothesis using the collagen-induced arthritis (CIA) rats. However, previous studies mainly involved short-term experiments; very few used the CIA model to…
	59	Pan, HD; Guo, RJ; Ju, YM; Wang, Q; Zhu, J; Xie, Y; Zheng, YF; Li, T; Liu, ZQ; Lu, LL; Li, F; Tong, B; Xiao, L; Xu, X; Leung, ELH; Li, RZ; Yang, HM; Wang, J; Zhou, H; Jia, HJ; Liu, L	A single bacterium restores the microbiome dysbiosis to protect bones from destruction in a rat model of rheumatoid arthritis	MICROBIOME	2019	10.1186/s40168-019-0719-1	Background: Early treatment is key for optimizing the therapeutic success of drugs, and the current initiating treatment that blocks the progression of bone destruction during the pre-arthritic stages remains unsatisfactory. The microbial disorder in rheumatoid arthritis (RA) patients is significantly reversed with effective treatment. Modulating aberrant gut microbiomes into a healthy state is a…
	60	Sredkova, P; Batsalova, T; Moten, D; Dzhambazov, B	Prebiotics can change immunomodulatory properties of probiotics	CENTRAL EUROPEAN JOURNAL OF IMMUNOLOGY	2020	10.5114/ceji.2020.101237	Beneficial effects of probiotics and prebiotics are mainly related to modulation of compositions and activities of gut microbiota as well as manipulation of immunological reactivity in autoimmune diseases. In the present study, we examined whether metabolic products from different strains of Lactobacillus brevis cultured with different prebiotics have similar immunomodulating properties on immune…
	61	Jin, ZL; Chen, XC	Changes in intestinal florae and serum inflammation in rheumatoid arthritis rats and the effects of probiotics	EUROPEAN REVIEW FOR MEDICAL AND PHARMACOLOGICAL SCIENCES	2020	10.26355/eurrev_202011_23839	OBJECTIVE: The aim of this study was to explore the changes in intestinal florae and serum inflammation in rats with rheumatoid arthritis (RA), and to investigate the effects of probiotics. MATERIALS AND METHODS: A total of 30 Sprague Dawley (SD) rats were randomly divided into three groups, namely, control group, model group, and probiotic group. The rats in the model group were prepared into mo…
	62	Fan, ZX; Yang, B; Ross, RP; Stanton, C; Shi, GX; Zhao, JX; Zhang, H; Chen, W	Protective effects of Bifidobacterium adolescentis on collagen-induced arthritis in rats depend on timing of administration	FOOD & FUNCTION	2020	10.1039/d0fo00077a	Emerging studies have addressed the role of probiotics in inflammation modulation via modifying gut microbiota. Perturbed gut microbiota is recognized as a pivotal trigger in the pathogenesis of rheumatoid arthritis (RA), and manipulating gut microbiota at the early phase may be helpful to alleviate the disease based on the fact that dysbiosis occurred prior to clinical arthritis. The current stu…
[truncated: 12 more rows]

## Sheet: Application of GM in RA
Subject	NO.	Authors	Article Title	Source Title	Publication Year	DOI	Abstract
[truncated: 61 more rows]
